# Supplementary material for: Single-cell transcriptomic analysis uncovers diverse and dynamic senescent cell populations
Source: Aging (Albany NY). 2023 Apr 19;15(8):2824–51. doi: 10.18632/aging.204666 (PMC10188353; doi:10.18632/aging.204666)
Supplement: Supplementary Table 1 [file aging-15-204666-s002.xlsx]

## Sheet: Sheet1
Supplementary Table 1. Marker genes differentially expressed in each sample versus all other samples in senescence models.
gene	avg_log2FC	pct.1	pct.2	p_val	p_val_adj	sample
ENO1	0.862601	0.999	0.865	0	0	CTRL
PGD	0.352029	0.848	0.594	0	0	CTRL
MFAP2	0.398867	0.549	0.276	0	0	CTRL
MRTO4	0.792515	0.868	0.44	0	0	CTRL
PINK1	-0.832767	0.279	0.61	0	0	CTRL
HP1BP3	0.406848	0.903	0.626	0	0	CTRL
CDC42	0.582708	0.998	0.831	0	0	CTRL
KDM1A	0.40882	0.648	0.384	0	0	CTRL
HNRNPR	1.26816	0.979	0.586	0	0	CTRL
ID3	1.30225	0.97	0.522	0	0	CTRL
SRSF10	0.582954	0.912	0.585	0	0	CTRL
SRRM1	0.626948	0.942	0.599	0	0	CTRL
STMN1	1.58322	0.997	0.757	0	0	CTRL
HMGN2	1.83676	0.997	0.737	0	0	CTRL
ARID1A	0.399891	0.757	0.478	0	0	CTRL
NUDC	0.662759	0.977	0.683	0	0	CTRL
WASF2	0.329259	0.851	0.562	0	0	CTRL
ATP5IF1	-1.01438	0.982	0.923	0	0	CTRL
SNHG3	0.689089	0.781	0.371	0	0	CTRL
SRSF4	0.528123	0.821	0.503	0	0	CTRL
SNRNP40	0.537663	0.795	0.449	0	0	CTRL
SERINC2	-0.904009	0.642	0.754	0	0	CTRL
KHDRBS1	1.21334	0.975	0.598	0	0	CTRL
MARCKSL1	0.570076	0.934	0.617	0	0	CTRL
RBBP4	0.504657	0.789	0.479	0	0	CTRL
SFPQ	1.29473	0.977	0.585	0	0	CTRL
PSMB2	0.331911	0.979	0.741	0	0	CTRL
CLSPN	0.644996	0.673	0.171	0	0	CTRL
THRAP3	0.614457	0.908	0.566	0	0	CTRL
MRPS15	0.322993	0.919	0.675	0	0	CTRL
CDCA8	0.70835	0.545	0.142	0	0	CTRL
C1orf122	-0.679937	0.899	0.833	0	0	CTRL
SF3A3	0.461362	0.764	0.464	0	0	CTRL
SMAP2	0.459348	0.754	0.453	0	0	CTRL
PPIH	0.437914	0.671	0.368	0	0	CTRL
YBX1	0.579479	1	0.914	0	0	CTRL
EBNA1BP2	0.780064	0.948	0.572	0	0	CTRL
CDC20	1.1087	0.724	0.15	0	0	CTRL
HYI	0.474243	0.78	0.457	0	0	CTRL
KIF2C	0.716722	0.582	0.126	0	0	CTRL
NASP	1.19607	0.915	0.414	0	0	CTRL
TXNDC12	0.386068	0.805	0.546	0	0	CTRL
BTF3L4	0.418784	0.937	0.637	0	0	CTRL
MAGOH	0.614938	0.881	0.508	0	0	CTRL
JUN	0.518384	0.817	0.523	0	0	CTRL
USP1	0.588079	0.679	0.302	0	0	CTRL
ITGB3BP	0.60737	0.71	0.249	0	0	CTRL
SERBP1	0.805813	0.996	0.788	0	0	CTRL
DEPDC1	0.741811	0.655	0.162	0	0	CTRL
SRSF11	0.660474	0.959	0.612	0	0	CTRL
TYW3	0.427919	0.765	0.485	0	0	CTRL
RABGGTB	0.401823	0.815	0.524	0	0	CTRL
FUBP1	0.448101	0.697	0.405	0	0	CTRL
LMO4	0.743134	0.805	0.5	0	0	CTRL
PKN2	0.324833	0.733	0.49	0	0	CTRL
ZNF326	0.346829	0.641	0.363	0	0	CTRL
PRPF38B	0.399884	0.717	0.429	0	0	CTRL
GNAI3	0.464005	0.913	0.601	0	0	CTRL
NRAS	0.399929	0.696	0.419	0	0	CTRL
PHGDH	0.363466	0.55	0.247	0	0	CTRL
RBM8A	0.814282	0.992	0.688	0	0	CTRL
TXNIP	-1.05626	0.115	0.525	0	0	CTRL
ANP32E	1.02771	0.925	0.506	0	0	CTRL
MRPL9	0.338994	0.703	0.47	0	0	CTRL
S100A11	-0.640924	1	0.994	0	0	CTRL
S100A6	-1.00844	1	0.999	0	0	CTRL
S100A16	0.424189	0.98	0.74	0	0	CTRL
S100A13	-0.609734	0.991	0.907	0	0	CTRL
ILF2	0.926559	0.979	0.65	0	0	CTRL
TPM3	0.665023	0.998	0.833	0	0	CTRL
CKS1B	1.27525	0.926	0.503	0	0	CTRL
SSR2	0.993013	0.996	0.725	0	0	CTRL
LMNA	0.418347	0.998	0.855	0	0	CTRL
CCT3	0.632943	0.986	0.732	0	0	CTRL
GPATCH4	0.584071	0.778	0.413	0	0	CTRL
HDGF	0.593503	0.901	0.6	0	0	CTRL
TAGLN2	0.564518	0.997	0.808	0	0	CTRL
PEA15	-0.69902	0.828	0.794	0	0	CTRL
UAP1	0.335579	0.83	0.547	0	0	CTRL
NUF2	0.709993	0.59	0.127	0	0	CTRL
ATP1B1	0.500428	0.749	0.419	0	0	CTRL
PRRX1	0.781276	0.829	0.404	0	0	CTRL
PRRC2C	0.832612	0.977	0.618	0	0	CTRL
PRDX6	-0.999215	0.996	0.97	0	0	CTRL
CACYBP	0.738602	0.947	0.594	0	0	CTRL
QSOX1	-1.75066	0.82	0.765	0	0	CTRL
DHX9	0.508722	0.824	0.528	0	0	CTRL
ARPC5	0.452212	0.996	0.78	0	0	CTRL
TSEN15	0.33345	0.715	0.478	0	0	CTRL
TPR	0.41509	0.84	0.537	0	0	CTRL
UCHL5	0.425733	0.666	0.358	0	0	CTRL
ASPM	1.22679	0.701	0.158	0	0	CTRL
KIF14	0.425735	0.448	0.119	0	0	CTRL
UBE2T	0.899933	0.799	0.312	0	0	CTRL
SNRPE	0.820458	0.995	0.739	0	0	CTRL
NUCKS1	1.16286	0.997	0.732	0	0	CTRL
NEK2	0.421372	0.413	0.093	0	0	CTRL
DTL	0.379202	0.454	0.131	0	0	CTRL
CENPF	1.63647	0.815	0.188	0	0	CTRL
RRP15	0.323806	0.679	0.438	0	0	CTRL
EPRS	0.477926	0.903	0.602	0	0	CTRL
LBR	0.582694	0.661	0.286	0	0	CTRL
SRP9	0.44436	0.996	0.828	0	0	CTRL
H3F3A	0.601674	0.999	0.852	0	0	CTRL
PARP1	0.748124	0.846	0.461	0	0	CTRL
GUK1	-0.615699	0.997	0.926	0	0	CTRL
NID1	0.348189	0.564	0.318	0	0	CTRL
FH	0.337113	0.659	0.37	0	0	CTRL
CEP170	0.538564	0.809	0.496	0	0	CTRL
HNRNPU	1.21309	0.986	0.656	0	0	CTRL
TMEM18	0.349314	0.681	0.443	0	0	CTRL
SOX11	0.937453	0.671	0.09	0	0	CTRL
ID2	0.644104	0.726	0.433	0	0	CTRL
RRM2	1.08878	0.844	0.205	0	0	CTRL
ODC1	0.497431	0.915	0.609	0	0	CTRL
PDIA6	0.612984	0.991	0.737	0	0	CTRL
SDC1	0.340675	0.526	0.29	0	0	CTRL
CENPA	0.626852	0.515	0.125	0	0	CTRL
OST4	-1.07747	0.999	0.968	0	0	CTRL
PPM1G	0.538394	0.919	0.615	0	0	CTRL
WDR43	0.339247	0.761	0.494	0	0	CTRL
SRSF7	1.1418	0.981	0.581	0	0	CTRL
GEMIN6	0.335652	0.666	0.427	0	0	CTRL
EPAS1	-1.02986	0.522	0.72	0	0	CTRL
MSH2	0.361416	0.506	0.231	0	0	CTRL
MSH6	0.40327	0.508	0.266	0	0	CTRL
XPO1	0.734859	0.918	0.544	0	0	CTRL
CCT4	0.724821	0.986	0.705	0	0	CTRL
ACTR2	0.497787	0.981	0.701	0	0	CTRL
C1D	0.374782	0.863	0.581	0	0	CTRL
PCBP1	0.651601	0.988	0.662	0	0	CTRL
SNRPG	0.598881	0.994	0.734	0	0	CTRL
TPRKB	0.65481	0.851	0.485	0	0	CTRL
MTHFD2	0.385167	0.699	0.474	0	0	CTRL
EVA1A	0.37275	0.697	0.435	0	0	CTRL
MRPL19	0.341396	0.756	0.507	0	0	CTRL
MAT2A	0.605969	0.872	0.513	0	0	CTRL
VAMP5	-1.07843	0.868	0.866	0	0	CTRL
IMMT	0.389319	0.761	0.503	0	0	CTRL
MRPL35	0.36645	0.701	0.447	0	0	CTRL
PDCL3	0.34622	0.701	0.425	0	0	CTRL
LIMS1	0.36078	0.86	0.587	0	0	CTRL
BUB1	0.520315	0.509	0.112	0	0	CTRL
CKAP2L	0.356056	0.431	0.121	0	0	CTRL
ACTR3	0.474602	0.991	0.736	0	0	CTRL
DDX18	0.513492	0.859	0.534	0	0	CTRL
NIFK	0.542361	0.877	0.537	0	0	CTRL
UBXN4	0.334451	0.899	0.624	0	0	CTRL
MCM6	0.396081	0.449	0.149	0	0	CTRL
DARS	0.390561	0.775	0.506	0	0	CTRL
MMADHC	0.320963	0.91	0.62	0	0	CTRL
RIF1	0.480806	0.696	0.396	0	0	CTRL
PRPF40A	0.595558	0.929	0.587	0	0	CTRL
PSMD14	0.367496	0.898	0.601	0	0	CTRL
DPP4	-0.456753	0.06	0.421	0	0	CTRL
SPC25	0.492416	0.538	0.125	0	0	CTRL
PPIG	0.449641	0.851	0.547	0	0	CTRL
SSB	0.337101	0.954	0.694	0	0	CTRL
HAT1	0.718668	0.86	0.435	0	0	CTRL
CDCA7	0.443497	0.44	0.086	0	0	CTRL
HNRNPA3	0.807807	0.987	0.741	0	0	CTRL
UBE2E3	0.661087	0.986	0.714	0	0	CTRL
ZC3H15	0.448617	0.935	0.627	0	0	CTRL
SF3B1	0.529051	0.92	0.594	0	0	CTRL
HSPD1	1.17315	0.996	0.759	0	0	CTRL
HSPE1	0.730793	0.999	0.831	0	0	CTRL
SGO2	0.607865	0.574	0.22	0	0	CTRL
BZW1	0.823165	0.997	0.741	0	0	CTRL
NOP58	0.499809	0.734	0.391	0	0	CTRL
BARD1	0.354411	0.498	0.203	0	0	CTRL
ATIC	0.32099	0.658	0.415	0	0	CTRL
XRCC5	1.09824	0.987	0.674	0	0	CTRL
IGFBP5	-1.86661	0.684	0.874	0	0	CTRL
ARPC2	0.396163	0.999	0.896	0	0	CTRL
CNOT9	0.382948	0.655	0.389	0	0	CTRL
SERPINE2	-1.28221	0.674	0.727	0	0	CTRL
PSMD1	0.532357	0.937	0.618	0	0	CTRL
NCL	1.1766	0.995	0.783	0	0	CTRL
PTMA	2.03508	1	0.87	0	0	CTRL
HJURP	0.331602	0.382	0.123	0	0	CTRL
COL6A3	0.711533	0.993	0.676	0	0	CTRL
LRRFIP1	0.469806	0.898	0.589	0	0	CTRL
COPS9	-0.580684	0.979	0.869	0	0	CTRL
DTYMK	1.0106	0.958	0.591	0	0	CTRL
BRK1	-0.671809	0.987	0.907	0	0	CTRL
LSM3	0.510496	0.983	0.749	0	0	CTRL
ANKRD28	0.520684	0.8	0.468	0	0	CTRL
DYNC1LI1	0.355066	0.747	0.491	0	0	CTRL
RPSA	0.453447	1	0.979	0	0	CTRL
CCDC12	0.354787	0.681	0.429	0	0	CTRL
SMARCC1	0.49024	0.788	0.494	0	0	CTRL
MANF	0.560821	0.918	0.606	0	0	CTRL
NT5DC2	0.399109	0.886	0.623	0	0	CTRL
PBRM1	0.478556	0.773	0.477	0	0	CTRL
GNL3	0.323763	0.71	0.476	0	0	CTRL
TKT	0.75689	0.976	0.663	0	0	CTRL
PSMD6	0.357442	0.78	0.496	0	0	CTRL
FOXP1	0.579607	0.873	0.542	0	0	CTRL
CMSS1	0.573811	0.739	0.335	0	0	CTRL
CIP2A	0.528417	0.576	0.157	0	0	CTRL
NECTIN3	0.612331	0.894	0.549	0	0	CTRL
NAA50	0.331316	0.869	0.596	0	0	CTRL
RUVBL1	0.422369	0.78	0.492	0	0	CTRL
CNBP	0.391188	0.943	0.664	0	0	CTRL
H1FX	0.859958	0.853	0.477	0	0	CTRL
MRPL3	0.606342	0.882	0.532	0	0	CTRL
CDV3	0.470011	0.969	0.689	0	0	CTRL
TOPBP1	0.326666	0.512	0.285	0	0	CTRL
ZBTB38	0.460543	0.863	0.552	0	0	CTRL
ATP1B3	0.357202	0.97	0.697	0	0	CTRL
U2SURP	0.4922	0.834	0.522	0	0	CTRL
HLTF	0.348921	0.646	0.407	0	0	CTRL
COMMD2	0.372903	0.678	0.416	0	0	CTRL
DHX36	0.436131	0.805	0.506	0	0	CTRL
GMPS	0.449447	0.69	0.379	0	0	CTRL
SSR3	0.462668	0.996	0.815	0	0	CTRL
PTX3	0.677457	0.637	0.276	0	0	CTRL
SMC4	1.30889	0.867	0.308	0	0	CTRL
TRIM59	0.771628	0.695	0.278	0	0	CTRL
CLDN11	0.557603	0.608	0.346	0	0	CTRL
RPL22L1	0.461201	0.995	0.751	0	0	CTRL
NCEH1	0.635968	0.802	0.437	0	0	CTRL
ECT2	0.657417	0.679	0.324	0	0	CTRL
GNB4	0.395729	0.71	0.435	0	0	CTRL
ACTL6A	0.616726	0.795	0.403	0	0	CTRL
MRPL47	0.67298	0.966	0.634	0	0	CTRL
PSMD2	0.367777	0.982	0.785	0	0	CTRL
IGF2BP2	0.361249	0.784	0.519	0	0	CTRL
TRA2B	0.605744	0.853	0.497	0	0	CTRL
RFC4	0.408841	0.501	0.165	0	0	CTRL
RPL39L	0.560182	0.728	0.322	0	0	CTRL
OSTN-AS1	-0.508369	0.09	0.396	0	0	CTRL
PAK2	0.329703	0.897	0.622	0	0	CTRL
SLBP	0.473641	0.768	0.491	0	0	CTRL
TACC3	0.543669	0.595	0.174	0	0	CTRL
NSD2	0.517857	0.65	0.306	0	0	CTRL
C4orf48	-0.802892	0.95	0.85	0	0	CTRL
LYAR	0.364301	0.667	0.405	0	0	CTRL
NCAPG	0.656584	0.63	0.14	0	0	CTRL
DHX15	0.405041	0.816	0.539	0	0	CTRL
RFC1	0.39687	0.689	0.427	0	0	CTRL
UGDH	0.525153	0.759	0.466	0	0	CTRL
UCHL1	-0.970608	0.981	0.96	0	0	CTRL
PAICS	0.895518	0.918	0.493	0	0	CTRL
SRP72	0.453826	0.899	0.611	0	0	CTRL
POLR2B	0.409134	0.766	0.492	0	0	CTRL
IGFBP7	-1.42906	0.986	0.896	0	0	CTRL
UBA6	0.329801	0.69	0.461	0	0	CTRL
G3BP2	0.326244	0.86	0.608	0	0	CTRL
NUP54	0.332633	0.588	0.339	0	0	CTRL
CCNI	0.654785	0.99	0.729	0	0	CTRL
MRPL1	0.332141	0.643	0.387	0	0	CTRL
FGF5	1.06863	0.947	0.558	0	0	CTRL
HNRNPD	1.28453	0.977	0.57	0	0	CTRL
HNRNPDL	1.10374	0.988	0.647	0	0	CTRL
MRPS18C	0.36634	0.907	0.612	0	0	CTRL
PYURF	0.419567	0.915	0.616	0	0	CTRL
TSPAN5	0.363733	0.774	0.521	0	0	CTRL
EIF4E	0.597017	0.951	0.607	0	0	CTRL
H2AFZ	1.97134	1	0.748	0	0	CTRL
UBE2D3	0.450855	0.983	0.713	0	0	CTRL
CISD2	0.370266	0.834	0.575	0	0	CTRL
CENPE	0.643789	0.54	0.152	0	0	CTRL
CASP6	0.336555	0.524	0.263	0	0	CTRL
GAR1	0.350032	0.642	0.382	0	0	CTRL
C4orf3	-0.780315	0.956	0.87	0	0	CTRL
MAD2L1	1.18453	0.838	0.234	0	0	CTRL
EXOSC9	0.535432	0.642	0.224	0	0	CTRL
CCNA2	1.04071	0.745	0.189	0	0	CTRL
NAA15	0.367075	0.657	0.4	0	0	CTRL
SMARCA5	0.493488	0.862	0.558	0	0	CTRL
ABCE1	0.726731	0.919	0.547	0	0	CTRL
LSM6	0.602215	0.877	0.524	0	0	CTRL
TMA16	0.418071	0.688	0.394	0	0	CTRL
HPF1	0.395832	0.686	0.389	0	0	CTRL
GALNT7	0.328736	0.574	0.352	0	0	CTRL
HMGB2	1.69755	0.833	0.353	0	0	CTRL
SAP30	0.504026	0.675	0.365	0	0	CTRL
CENPU	0.538391	0.627	0.175	0	0	CTRL
TRIP13	0.362927	0.522	0.177	0	0	CTRL
CCT5	0.945018	0.987	0.678	0	0	CTRL
SUB1	0.384458	0.999	0.884	0	0	CTRL
TARS	0.387259	0.819	0.545	0	0	CTRL
BRIX1	0.425495	0.736	0.429	0	0	CTRL
RPL37	-0.519181	1	0.99	0	0	CTRL
ITGA2	0.49526	0.8	0.497	0	0	CTRL
FST	1.01458	0.965	0.713	0	0	CTRL
GPX8	0.485482	0.991	0.74	0	0	CTRL
SMIM15	0.358425	0.785	0.52	0	0	CTRL
KIF2A	0.377339	0.684	0.415	0	0	CTRL
ADAMTS6	0.394655	0.426	0.112	0	0	CTRL
CENPK	0.634661	0.712	0.21	0	0	CTRL
CCNB1	1.67978	0.821	0.238	0	0	CTRL
CENPH	0.451805	0.568	0.16	0	0	CTRL
AK6	0.352885	0.779	0.524	0	0	CTRL
FOXD1	0.608003	0.913	0.559	0	0	CTRL
DHFR	0.529045	0.66	0.245	0	0	CTRL
VCAN	0.60464	0.853	0.491	0	0	CTRL
NR2F1	0.381766	0.889	0.588	0	0	CTRL
GLRX	-1.10641	0.729	0.796	0	0	CTRL
LMNB1	0.702453	0.609	0.099	0	0	CTRL
ADAMTS19	-0.426456	0.011	0.298	0	0	CTRL
UQCRQ	-0.700123	0.995	0.914	0	0	CTRL
PPP2CA	0.518776	0.885	0.552	0	0	CTRL
DDX46	0.751309	0.932	0.558	0	0	CTRL
H2AFY	0.492304	0.926	0.635	0	0	CTRL
TGFBI	-1.22826	0.835	0.777	0	0	CTRL
HNRNPA0	0.618409	0.869	0.533	0	0	CTRL
KIF20A	0.482765	0.481	0.084	0	0	CTRL
HSPA9	0.432423	0.898	0.599	0	0	CTRL
CYSTM1	-0.696166	0.384	0.658	0	0	CTRL
IK	0.344301	0.839	0.561	0	0	CTRL
LARS	0.383312	0.789	0.528	0	0	CTRL
TCERG1	0.430753	0.689	0.4	0	0	CTRL
TCOF1	0.331057	0.566	0.356	0	0	CTRL
ATOX1	-0.901942	0.979	0.899	0	0	CTRL
G3BP1	0.817736	0.944	0.583	0	0	CTRL
MRPL22	0.508598	0.865	0.53	0	0	CTRL
PTTG1	1.59266	0.923	0.4	0	0	CTRL
HMMR	0.919948	0.708	0.153	0	0	CTRL
RARS	0.349802	0.871	0.593	0	0	CTRL
SPDL1	0.442172	0.618	0.303	0	0	CTRL
NPM1	0.727922	0.999	0.939	0	0	CTRL
RPL26L1	0.439574	0.935	0.654	0	0	CTRL
ATP6V0E1	-0.949779	0.995	0.937	0	0	CTRL
PRELID1	0.479596	0.997	0.807	0	0	CTRL
NHP2	0.557014	0.985	0.731	0	0	CTRL
HNRNPAB	1.24012	0.987	0.623	0	0	CTRL
HNRNPH1	1.02801	0.982	0.681	0	0	CTRL
MGAT4B	-0.747046	0.672	0.759	0	0	CTRL
PRPF4B	0.320891	0.693	0.459	0	0	CTRL
EEF1E1	0.402761	0.915	0.623	0	0	CTRL
PAK1IP1	0.442582	0.648	0.329	0	0	CTRL
NOL7	0.515855	0.964	0.671	0	0	CTRL
DEK	1.22568	0.977	0.604	0	0	CTRL
GMNN	0.678007	0.733	0.284	0	0	CTRL
HIST1H1C	-1.09791	0.516	0.706	0	0	CTRL
HIST1H4C	0.957124	0.763	0.376	0	0	CTRL
HIST1H2AC	-1.01936	0.234	0.621	0	0	CTRL
HIST1H1D	0.595242	0.363	0.066	0	0	CTRL
HIST1H4H	-0.346285	0.06	0.356	0	0	CTRL
HIST1H1B	0.415545	0.303	0.07	0	0	CTRL
ABCF1	0.329537	0.837	0.578	0	0	CTRL
TUBB	1.05181	0.999	0.869	0	0	CTRL
IER3	0.382598	0.781	0.523	0	0	CTRL
DDX39B	0.586893	0.917	0.583	0	0	CTRL
CLIC1	0.532221	1	0.879	0	0	CTRL
LSM2	0.68999	0.895	0.536	0	0	CTRL
KIFC1	0.373138	0.431	0.104	0	0	CTRL
SNRPC	0.387003	0.946	0.689	0	0	CTRL
SRPK1	0.488178	0.784	0.481	0	0	CTRL
SRSF3	1.25193	0.994	0.659	0	0	CTRL
CDKN1A	-1.37698	0.589	0.731	0	0	CTRL
TOMM6	0.384823	0.995	0.785	0	0	CTRL
RPL7L1	0.474037	0.89	0.594	0	0	CTRL
RRP36	0.32848	0.832	0.577	0	0	CTRL
HSP90AB1	1.40844	0.999	0.847	0	0	CTRL
CDC5L	0.471628	0.707	0.393	0	0	CTRL
MCM3	0.60097	0.606	0.242	0	0	CTRL
HMGN3	0.449789	0.907	0.617	0	0	CTRL
TTK	0.453693	0.45	0.109	0	0	CTRL
TPBG	0.493155	0.792	0.462	0	0	CTRL
SYNCRIP	0.733906	0.964	0.621	0	0	CTRL
PNISR	0.335355	0.784	0.443	0	0	CTRL
AMD1	0.337991	0.789	0.517	0	0	CTRL
MARCKS	1.70506	0.997	0.65	0	0	CTRL
HDAC2	0.689041	0.944	0.579	0	0	CTRL
SERINC1	-0.980853	0.707	0.754	0	0	CTRL
CENPW	1.1683	0.899	0.305	0	0	CTRL
ECHDC1	0.320292	0.827	0.575	0	0	CTRL
ARHGAP18	0.418296	0.653	0.396	0	0	CTRL
ENPP1	0.459813	0.498	0.158	0	0	CTRL
BCLAF1	0.677145	0.92	0.564	0	0	CTRL
PERP	-0.990616	0.83	0.795	0	0	CTRL
UTRN	0.339329	0.662	0.426	0	0	CTRL
PCMT1	0.397767	0.926	0.632	0	0	CTRL
AKAP12	0.445758	0.58	0.326	0	0	CTRL
FBXO5	0.520238	0.528	0.168	0	0	CTRL
SYNJ2	0.574448	0.767	0.423	0	0	CTRL
EZR	0.647539	0.895	0.531	0	0	CTRL
SOD2	-1.1555	0.649	0.77	0	0	CTRL
ACAT2	0.37143	0.699	0.402	0	0	CTRL
TCP1	0.468567	0.954	0.689	0	0	CTRL
NUDT1	0.660856	0.882	0.531	0	0	CTRL
RAC1	0.743594	0.999	0.813	0	0	CTRL
RPA3	0.776928	0.889	0.497	0	0	CTRL
PHF14	0.423979	0.588	0.278	0	0	CTRL
BZW2	0.417873	0.736	0.453	0	0	CTRL
TWISTNB	0.343693	0.614	0.386	0	0	CTRL
TOMM7	-0.929152	0.993	0.93	0	0	CTRL
IGF2BP3	0.338518	0.789	0.543	0	0	CTRL
CYCS	0.357246	0.989	0.782	0	0	CTRL
HNRNPA2B1	1.18389	0.999	0.771	0	0	CTRL
CBX3	0.805922	0.989	0.7	0	0	CTRL
GGCT	0.334994	0.635	0.399	0	0	CTRL
LSM5	0.946803	0.987	0.694	0	0	CTRL
ANLN	1.10638	0.82	0.226	0	0	CTRL
RALA	0.326406	0.864	0.594	0	0	CTRL
INHBA	0.529236	0.764	0.494	0	0	CTRL
PSMA2	0.641132	0.997	0.825	0	0	CTRL
H2AFV	1.12287	0.989	0.673	0	0	CTRL
CCT6A	0.931411	0.99	0.684	0	0	CTRL
BAZ1B	0.490058	0.805	0.502	0	0	CTRL
ELN	0.393431	0.297	0.076	0	0	CTRL
RSBN1L	0.322401	0.53	0.308	0	0	CTRL
MAGI2-AS3	0.340336	0.832	0.595	0	0	CTRL
SEMA3A	0.49743	0.785	0.473	0	0	CTRL
DBF4	0.547503	0.58	0.201	0	0	CTRL
SRI	0.362952	0.973	0.713	0	0	CTRL
STEAP1	0.320167	0.388	0.095	0	0	CTRL
PDAP1	0.404953	0.981	0.765	0	0	CTRL
MCM7	0.877742	0.792	0.267	0	0	CTRL
PCOLCE	0.630422	0.887	0.475	0	0	CTRL
POP7	0.387306	0.837	0.549	0	0	CTRL
SRRT	0.435913	0.656	0.351	0	0	CTRL
SYPL1	0.505332	0.936	0.597	0	0	CTRL
LSM8	0.566704	0.9	0.564	0	0	CTRL
ATP6V1F	-0.826694	0.956	0.883	0	0	CTRL
PTN	1.00565	0.926	0.467	0	0	CTRL
CREB3L2	0.451278	0.778	0.495	0	0	CTRL
NDUFB2	-0.624358	0.993	0.906	0	0	CTRL
SSBP1	0.594235	0.993	0.782	0	0	CTRL
EZH2	0.455073	0.515	0.123	0	0	CTRL
PDIA4	0.504545	0.886	0.576	0	0	CTRL
NCAPG2	0.336863	0.444	0.133	0	0	CTRL
CNOT7	0.413812	0.869	0.586	0	0	CTRL
PCM1	0.3257	0.706	0.481	0	0	CTRL
CDCA2	0.422602	0.446	0.128	0	0	CTRL
CLU	-1.39349	0.5	0.714	0	0	CTRL
PBK	0.878014	0.745	0.167	0	0	CTRL
EIF4EBP1	0.580299	0.919	0.632	0	0	CTRL
PLAT	-0.916857	0.269	0.528	0	0	CTRL
VDAC3	0.480184	0.948	0.66	0	0	CTRL
PRKDC	0.972557	0.968	0.605	0	0	CTRL
MCM4	0.515284	0.583	0.231	0	0	CTRL
UBE2V2	0.362916	0.88	0.605	0	0	CTRL
TCEA1	0.42289	0.928	0.641	0	0	CTRL
MRPL15	0.48041	0.849	0.512	0	0	CTRL
GGH	0.708315	0.854	0.389	0	0	CTRL
RRS1	0.517654	0.7	0.375	0	0	CTRL
TRAM1	-0.773457	0.925	0.813	0	0	CTRL
RPL7	0.408753	1	0.944	0	0	CTRL
ZFHX4	0.385655	0.54	0.312	0	0	CTRL
FABP5	1.3434	0.947	0.426	0	0	CTRL
NBN	0.330967	0.589	0.364	0	0	CTRL
MTDH	0.558297	0.99	0.643	0	0	CTRL
YWHAZ	0.590759	0.998	0.82	0	0	CTRL
DCAF13	0.452538	0.831	0.512	0	0	CTRL
EIF3E	0.663668	0.993	0.772	0	0	CTRL
NUDCD1	0.342062	0.571	0.323	0	0	CTRL
ENY2	0.467931	0.99	0.742	0	0	CTRL
RAD21	1.07306	0.924	0.519	0	0	CTRL
MRPL13	0.513081	0.937	0.629	0	0	CTRL
HAS2	0.759139	0.445	0.135	0	0	CTRL
ATAD2	0.585421	0.653	0.244	0	0	CTRL
ASAP1	0.357507	0.842	0.566	0	0	CTRL
EEF1D	0.33054	0.999	0.914	0	0	CTRL
PUF60	0.33505	0.856	0.581	0	0	CTRL
PUM3	0.330772	0.643	0.402	0	0	CTRL
PSIP1	0.609447	0.797	0.392	0	0	CTRL
DNAJA1	0.451509	0.974	0.709	0	0	CTRL
STOML2	0.462886	0.939	0.654	0	0	CTRL
TLN1	0.595303	0.976	0.673	0	0	CTRL
MELK	0.376933	0.498	0.17	0	0	CTRL
EXOSC3	0.326902	0.634	0.404	0	0	CTRL
HNRNPK	0.782154	0.995	0.735	0	0	CTRL
SPIN1	0.322449	0.711	0.478	0	0	CTRL
CKS2	1.8021	0.947	0.542	0	0	CTRL
ANP32B	0.609502	0.984	0.728	0	0	CTRL
SMC2	0.922383	0.818	0.333	0	0	CTRL
CTNNAL1	0.51162	0.908	0.604	0	0	CTRL
SVEP1	-0.397186	0.068	0.351	0	0	CTRL
POLE3	0.468563	0.721	0.403	0	0	CTRL
ATP6V1G1	-0.668749	0.971	0.856	0	0	CTRL
PHF19	0.781207	0.859	0.459	0	0	CTRL
RAB14	0.353756	0.849	0.561	0	0	CTRL
PSMB7	0.327867	0.987	0.772	0	0	CTRL
HSPA5	0.432085	0.959	0.636	0	0	CTRL
C9orf16	-0.959673	0.85	0.837	0	0	CTRL
WDR34	0.392327	0.622	0.319	0	0	CTRL
SET	1.12237	0.998	0.793	0	0	CTRL
NTMT1	0.605104	0.966	0.665	0	0	CTRL
PRRX2	0.538976	0.746	0.45	0	0	CTRL
PHPT1	-0.563419	0.997	0.928	0	0	CTRL
NPDC1	-1.08718	0.417	0.745	0	0	CTRL
TUBB4B	1.24483	0.996	0.69	0	0	CTRL
GTPBP4	0.535805	0.85	0.525	0	0	CTRL
PFKP	0.499534	0.849	0.533	0	0	CTRL
KLF6	0.395783	0.814	0.534	0	0	CTRL
GDI2	0.427759	0.959	0.694	0	0	CTRL
RBM17	0.427613	0.867	0.573	0	0	CTRL
ATP5F1C	0.40422	0.974	0.717	0	0	CTRL
CDC123	0.348295	0.838	0.55	0	0	CTRL
MCM10	0.372687	0.399	0.096	0	0	CTRL
SEPHS1	0.334896	0.597	0.354	0	0	CTRL
VIM	0.349897	1	0.996	0	0	CTRL
KIF5B	0.352527	0.966	0.733	0	0	CTRL
NRP1	0.526913	0.691	0.379	0	0	CTRL
HNRNPF	0.740607	0.937	0.564	0	0	CTRL
ZNF22	0.610159	0.704	0.285	0	0	CTRL
DKK1	0.723399	0.766	0.411	0	0	CTRL
ZWINT	0.786921	0.768	0.241	0	0	CTRL
TFAM	0.451342	0.671	0.383	0	0	CTRL
CDK1	0.801106	0.578	0.153	0	0	CTRL
HNRNPH3	0.794478	0.967	0.653	0	0	CTRL
CCAR1	0.370938	0.781	0.523	0	0	CTRL
DDX21	0.609663	0.929	0.568	0	0	CTRL
SRGN	0.421154	0.433	0.163	0	0	CTRL
PSAP	-1.09267	0.722	0.718	0	0	CTRL
DNAJC9	0.688358	0.754	0.316	0	0	CTRL
PPIF	0.538234	0.77	0.457	0	0	CTRL
PLAC9	0.331031	0.7	0.418	0	0	CTRL
KIF20B	0.964471	0.723	0.213	0	0	CTRL
RPP30	0.396153	0.712	0.428	0	0	CTRL
PPP1R3C	-0.83528	0.083	0.426	0	0	CTRL
KIF11	0.715271	0.609	0.156	0	0	CTRL
CEP55	0.716442	0.669	0.169	0	0	CTRL
NOC3L	0.346205	0.632	0.378	0	0	CTRL
HELLS	0.696013	0.706	0.23	0	0	CTRL
PDLIM1	-0.939011	0.918	0.865	0	0	CTRL
NOLC1	0.352173	0.567	0.338	0	0	CTRL
ATP5MD	-0.692169	0.997	0.919	0	0	CTRL
SMNDC1	0.356707	0.677	0.433	0	0	CTRL
SMC3	0.741823	0.864	0.464	0	0	CTRL
EIF3A	0.56947	0.988	0.723	0	0	CTRL
BUB3	0.790039	0.919	0.567	0	0	CTRL
CTBP2	0.326587	0.707	0.477	0	0	CTRL
BCCIP	0.321242	0.659	0.433	0	0	CTRL
MKI67	1.12846	0.72	0.144	0	0	CTRL
ZNF511	0.455788	0.772	0.468	0	0	CTRL
IFITM3	-1.23322	0.922	0.905	0	0	CTRL
RPLP2	-0.471625	1	0.985	0	0	CTRL
POLR2L	-0.930829	0.997	0.958	0	0	CTRL
CD81	-0.799947	0.995	0.864	0	0	CTRL
RRM1	0.783392	0.846	0.421	0	0	CTRL
IPO7	0.393585	0.868	0.605	0	0	CTRL
DKK3	-1.05005	0.945	0.814	0	0	CTRL
COPB1	0.443331	0.942	0.618	0	0	CTRL
PSMA1	0.423777	0.987	0.769	0	0	CTRL
C11orf58	0.384691	0.986	0.746	0	0	CTRL
LDHA	0.614221	0.999	0.87	0	0	CTRL
CCDC34	0.42047	0.633	0.296	0	0	CTRL
KIF18A	0.35794	0.446	0.167	0	0	CTRL
EIF3M	0.458198	0.949	0.677	0	0	CTRL
CAPRIN1	0.403191	0.918	0.628	0	0	CTRL
CD44	-0.856727	0.993	0.887	0	0	CTRL
PAMR1	-0.602202	0.273	0.556	0	0	CTRL
FJX1	0.348314	0.603	0.361	0	0	CTRL
MDK	0.928369	0.968	0.637	0	0	CTRL
CKAP5	0.498696	0.738	0.485	0	0	CTRL
PSMC3	0.475109	0.965	0.682	0	0	CTRL
SSRP1	0.819683	0.868	0.453	0	0	CTRL
TIMM10	0.629628	0.961	0.655	0	0	CTRL
ZFP91	0.472998	0.826	0.525	0	0	CTRL
FEN1	0.387237	0.535	0.22	0	0	CTRL
FTH1	-1.3419	1	0.999	0	0	CTRL
AHNAK	0.701982	0.993	0.73	0	0	CTRL
GANAB	0.417364	0.9	0.593	0	0	CTRL
UQCC3	0.399966	0.905	0.625	0	0	CTRL
SNHG1	0.560806	0.776	0.404	0	0	CTRL
STIP1	0.468108	0.848	0.564	0	0	CTRL
PPP1R14B	0.921495	0.999	0.864	0	0	CTRL
PRDX5	-0.907502	0.966	0.911	0	0	CTRL
SF1	0.328209	0.849	0.576	0	0	CTRL
NEAT1	-0.960665	0.957	0.56	0	0	CTRL
EFEMP2	-0.713987	0.858	0.806	0	0	CTRL
FOSL1	0.732862	0.855	0.51	0	0	CTRL
BANF1	0.664673	0.996	0.8	0	0	CTRL
SF3B2	0.47027	0.906	0.607	0	0	CTRL
MRPL11	0.438807	0.885	0.601	0	0	CTRL
PPP1CA	0.500412	0.918	0.61	0	0	CTRL
CCND1	-1.83732	0.992	0.968	0	0	CTRL
SPCS2	0.676719	0.989	0.678	0	0	CTRL
SERPINH1	0.992574	0.976	0.589	0	0	CTRL
TMEM126A	0.418675	0.835	0.546	0	0	CTRL
TMEM123	0.399662	0.92	0.634	0	0	CTRL
DCUN1D5	0.492938	0.891	0.562	0	0	CTRL
CARD16	-0.576887	0.253	0.533	0	0	CTRL
POGLUT3	0.336961	0.525	0.269	0	0	CTRL
RBM7	0.367854	0.651	0.406	0	0	CTRL
ATP5MG	-0.612682	0.998	0.944	0	0	CTRL
H2AFX	0.838354	0.829	0.434	0	0	CTRL
HSPA8	0.825406	0.999	0.833	0	0	CTRL
NRGN	0.36831	0.534	0.193	0	0	CTRL
STT3A	0.464588	0.788	0.485	0	0	CTRL
CHEK1	0.449449	0.615	0.261	0	0	CTRL
NCAPD3	0.384932	0.524	0.241	0	0	CTRL
FOXM1	0.517742	0.594	0.161	0	0	CTRL
CCND2	-0.905723	0.005	0.3	0	0	CTRL
RAD51AP1	0.394327	0.526	0.148	0	0	CTRL
MRPL51	0.421967	0.998	0.826	0	0	CTRL
NCAPD2	0.557126	0.611	0.221	0	0	CTRL
CHD4	0.453321	0.841	0.567	0	0	CTRL
PTMS	0.761361	1	0.861	0	0	CTRL
CDCA3	0.824414	0.693	0.158	0	0	CTRL
PHB2	0.536391	0.951	0.66	0	0	CTRL
EMG1	0.513722	0.792	0.458	0	0	CTRL
C1S	-0.708054	0.211	0.498	0	0	CTRL
GABARAPL1	-0.918821	0.213	0.643	0	0	CTRL
MAGOHB	0.648239	0.89	0.519	0	0	CTRL
HEBP1	-0.752174	0.638	0.714	0	0	CTRL
EMP1	0.465839	0.795	0.486	0	0	CTRL
RECQL	0.391695	0.754	0.496	0	0	CTRL
LDHB	0.548628	0.999	0.882	0	0	CTRL
MED21	0.437608	0.775	0.479	0	0	CTRL
MRPS35	0.34264	0.751	0.506	0	0	CTRL
ERGIC2	0.397604	0.91	0.618	0	0	CTRL
TMTC1	-0.644824	0.22	0.553	0	0	CTRL
TUBA1B	1.53341	0.999	0.826	0	0	CTRL
TUBA1C	1.17705	0.997	0.725	0	0	CTRL
TROAP	0.511055	0.551	0.118	0	0	CTRL
RACGAP1	0.562293	0.617	0.214	0	0	CTRL
COX14	-0.893682	0.719	0.775	0	0	CTRL
LIMA1	0.564234	0.913	0.598	0	0	CTRL
SMAGP	0.354674	0.657	0.409	0	0	CTRL
PFDN5	-0.565754	0.999	0.981	0	0	CTRL
PCBP2	0.646802	0.995	0.757	0	0	CTRL
CBX5	0.834742	0.932	0.545	0	0	CTRL
HNRNPA1	0.923363	0.996	0.79	0	0	CTRL
PA2G4	0.864263	0.985	0.654	0	0	CTRL
RPL41	-0.541587	1	0.998	0	0	CTRL
PTGES3	1.0283	0.997	0.742	0	0	CTRL
CDK4	0.657649	0.941	0.614	0	0	CTRL
SRGAP1	0.341565	0.746	0.507	0	0	CTRL
RAP1B	0.455125	0.973	0.69	0	0	CTRL
NUP107	0.389592	0.538	0.222	0	0	CTRL
CCT2	0.896449	0.981	0.664	0	0	CTRL
KRR1	0.439153	0.819	0.516	0	0	CTRL
PHLDA1	0.463852	0.949	0.631	0	0	CTRL
NAP1L1	0.321264	0.998	0.889	0	0	CTRL
CSRP2	0.678528	0.896	0.545	0	0	CTRL
PPP1R12A	0.502468	0.851	0.535	0	0	CTRL
CCDC59	0.405633	0.735	0.442	0	0	CTRL
ATP2B1	0.666593	0.865	0.509	0	0	CTRL
BTG1	0.421716	0.872	0.555	0	0	CTRL
UBE2N	0.534725	0.974	0.68	0	0	CTRL
MRPL42	0.499096	0.949	0.663	0	0	CTRL
SOCS2	0.412747	0.558	0.297	0	0	CTRL
SNRPF	0.586275	0.985	0.712	0	0	CTRL
TMPO	1.17754	0.849	0.299	0	0	CTRL
SLC25A3	0.408005	0.999	0.908	0	0	CTRL
UTP20	0.421562	0.573	0.268	0	0	CTRL
NUP37	0.593045	0.771	0.351	0	0	CTRL
PARPBP	0.356243	0.47	0.154	0	0	CTRL
HSP90B1	0.825524	0.997	0.761	0	0	CTRL
C12orf75	0.72692	0.999	0.873	0	0	CTRL
PWP1	0.425398	0.803	0.515	0	0	CTRL
CORO1C	0.357036	0.947	0.698	0	0	CTRL
GPN3	0.367781	0.718	0.457	0	0	CTRL
PPP1CC	0.622432	0.931	0.579	0	0	CTRL
TBX3	0.38472	0.601	0.361	0	0	CTRL
CIT	0.326102	0.401	0.101	0	0	CTRL
RPLP0	0.334036	1	0.974	0	0	CTRL
SRSF9	0.357658	0.993	0.8	0	0	CTRL
MLEC	0.326647	0.93	0.656	0	0	CTRL
RSRC2	0.410097	0.795	0.521	0	0	CTRL
GTF2H3	0.420667	0.69	0.403	0	0	CTRL
RAN	0.92466	1	0.892	0	0	CTRL
SACS	0.703465	0.825	0.473	0	0	CTRL
HMGB1	1.87855	1	0.825	0	0	CTRL
HSPH1	0.592427	0.894	0.571	0	0	CTRL
BRCA2	0.320221	0.395	0.105	0	0	CTRL
RFC3	0.348828	0.476	0.16	0	0	CTRL
EXOSC8	0.729396	0.799	0.349	0	0	CTRL
RGCC	-0.796158	0.166	0.508	0	0	CTRL
ESD	0.436539	0.987	0.773	0	0	CTRL
KPNA3	0.36336	0.849	0.578	0	0	CTRL
DLEU2	0.342888	0.456	0.141	0	0	CTRL
CKAP2	0.888469	0.706	0.312	0	0	CTRL
SUGT1	0.34274	0.842	0.584	0	0	CTRL
DIAPH3	0.736611	0.764	0.306	0	0	CTRL
MZT1	0.648546	0.867	0.507	0	0	CTRL
COMMD6	-0.875211	0.982	0.905	0	0	CTRL
RBM26	0.351359	0.663	0.424	0	0	CTRL
IPO5	0.44224	0.862	0.586	0	0	CTRL
TEX30	0.462335	0.678	0.35	0	0	CTRL
ARGLU1	0.63603	0.911	0.542	0	0	CTRL
TFDP1	0.330443	0.811	0.574	0	0	CTRL
GAS6	-1.52056	0.955	0.902	0	0	CTRL
APEX1	0.598218	0.93	0.61	0	0	CTRL
HNRNPC	0.944706	0.995	0.76	0	0	CTRL
SUPT16H	0.719399	0.881	0.518	0	0	CTRL
ACIN1	0.336791	0.698	0.459	0	0	CTRL
PABPN1	0.375824	0.867	0.573	0	0	CTRL
G2E3	0.399311	0.542	0.303	0	0	CTRL
BAZ1A	0.604517	0.775	0.409	0	0	CTRL
PSMA6	0.376215	0.976	0.727	0	0	CTRL
PNN	0.620617	0.845	0.48	0	0	CTRL
MIS18BP1	0.471825	0.533	0.174	0	0	CTRL
LRR1	0.503448	0.677	0.315	0	0	CTRL
TMX1	0.371112	0.776	0.524	0	0	CTRL
PSMC6	0.608903	0.944	0.58	0	0	CTRL
GNPNAT1	0.427126	0.735	0.45	0	0	CTRL
CDKN3	1.12059	0.829	0.22	0	0	CTRL
DLGAP5	1.07474	0.724	0.143	0	0	CTRL
PSMA3	0.582485	0.985	0.709	0	0	CTRL
KIAA0586	0.429216	0.559	0.27	0	0	CTRL
SIX1	0.344808	0.532	0.324	0	0	CTRL
PPP2R5E	0.366986	0.757	0.506	0	0	CTRL
EIF2S1	0.505852	0.895	0.584	0	0	CTRL
ERH	0.560302	0.998	0.815	0	0	CTRL
MED6	0.382972	0.648	0.348	0	0	CTRL
RBM25	0.550273	0.9	0.562	0	0	CTRL
CALM1	0.631854	0.999	0.854	0	0	CTRL
CPSF2	0.351447	0.699	0.461	0	0	CTRL
IFI27L2	-1.07209	0.836	0.861	0	0	CTRL
PAPOLA	0.342902	0.913	0.651	0	0	CTRL
VRK1	0.365868	0.508	0.199	0	0	CTRL
YY1	0.443358	0.905	0.587	0	0	CTRL
HSP90AA1	0.967052	1	0.95	0	0	CTRL
EIF5	0.725541	0.982	0.661	0	0	CTRL
SIVA1	0.518334	0.979	0.697	0	0	CTRL
CDCA4	0.345767	0.511	0.234	0	0	CTRL
ARHGAP11A	0.422845	0.478	0.156	0	0	CTRL
GREM1	0.725471	0.96	0.652	0	0	CTRL
MEIS2	0.493981	0.549	0.267	0	0	CTRL
SRP14	-0.94125	0.999	0.98	0	0	CTRL
BUB1B	0.450662	0.478	0.117	0	0	CTRL
KNSTRN	0.437889	0.533	0.255	0	0	CTRL
KNL1	0.57579	0.56	0.127	0	0	CTRL
NUSAP1	1.08722	0.761	0.162	0	0	CTRL
TMEM87A	0.328791	0.679	0.448	0	0	CTRL
SERF2	-1.31469	1	0.995	0	0	CTRL
DUT	0.86353	0.958	0.649	0	0	CTRL
RSL24D1	0.525626	0.955	0.648	0	0	CTRL
TCF12	0.446677	0.692	0.425	0	0	CTRL
SLTM	0.356736	0.808	0.549	0	0	CTRL
CCNB2	0.846584	0.692	0.15	0	0	CTRL
PPIB	0.729114	0.998	0.848	0	0	CTRL
PCLAF	1.37223	0.922	0.252	0	0	CTRL
HACD3	0.614042	0.879	0.536	0	0	CTRL
TIPIN	0.364562	0.496	0.211	0	0	CTRL
ZWILCH	0.37445	0.564	0.263	0	0	CTRL
ANP32A	0.547767	0.85	0.489	0	0	CTRL
KIF23	0.740279	0.649	0.215	0	0	CTRL
COMMD4	0.521216	0.905	0.619	0	0	CTRL
PSMA4	0.809447	0.994	0.706	0	0	CTRL
MORF4L1	0.383209	0.998	0.793	0	0	CTRL
MESD	0.509943	0.89	0.59	0	0	CTRL
HDGFL3	0.358908	0.778	0.542	0	0	CTRL
SEC11A	0.578087	0.995	0.802	0	0	CTRL
MFGE8	-1.58774	0.874	0.813	0	0	CTRL
FANCI	0.395569	0.534	0.181	0	0	CTRL
IQGAP1	0.443184	0.927	0.622	0	0	CTRL
PRC1	1.23776	0.829	0.196	0	0	CTRL
NR2F2	0.850071	0.936	0.565	0	0	CTRL
ARRDC4	-0.804663	0.038	0.401	0	0	CTRL
SNRPA1	0.560824	0.887	0.544	0	0	CTRL
POLR3K	0.329331	0.782	0.545	0	0	CTRL
NME4	-0.690113	0.959	0.871	0	0	CTRL
UBE2I	0.656928	0.977	0.69	0	0	CTRL
MRPS34	0.515357	0.977	0.709	0	0	CTRL
HAGH	-0.667478	0.437	0.68	0	0	CTRL
RPS2	0.443923	1	0.991	0	0	CTRL
RNPS1	0.406025	0.875	0.581	0	0	CTRL
ATP6V0C	-0.596137	0.971	0.831	0	0	CTRL
SRRM2	0.68759	0.958	0.596	0	0	CTRL
ELOB	-0.839064	0.999	0.946	0	0	CTRL
TNFRSF12A	0.909967	0.996	0.676	0	0	CTRL
EMP2	0.517736	0.662	0.289	0	0	CTRL
RSL1D1	0.551767	0.918	0.61	0	0	CTRL
GSPT1	0.65437	0.96	0.643	0	0	CTRL
ARL6IP1	1.33811	0.886	0.534	0	0	CTRL
THUMPD1	0.368729	0.649	0.402	0	0	CTRL
PLK1	0.676931	0.559	0.144	0	0	CTRL
QPRT	-0.54454	0.102	0.393	0	0	CTRL
KIF22	0.332014	0.604	0.386	0	0	CTRL
MAZ	0.400097	0.772	0.489	0	0	CTRL
PAGR1	0.381461	0.643	0.384	0	0	CTRL
DCTPP1	0.367843	0.711	0.459	0	0	CTRL
BCL7C	0.393971	0.929	0.669	0	0	CTRL
ORAI3	-0.420207	0.094	0.43	0	0	CTRL
VKORC1	-0.764807	0.977	0.871	0	0	CTRL
FUS	0.939092	0.944	0.536	0	0	CTRL
TGFB1I1	0.413045	0.924	0.627	0	0	CTRL
SHCBP1	0.703569	0.68	0.171	0	0	CTRL
VPS35	0.341262	0.897	0.634	0	0	CTRL
ORC6	0.572454	0.634	0.218	0	0	CTRL
DNAJA2	0.377671	0.848	0.569	0	0	CTRL
NETO2	0.396559	0.5	0.18	0	0	CTRL
BRD7	0.32793	0.734	0.499	0	0	CTRL
CHD9	0.357908	0.748	0.493	0	0	CTRL
NUDT21	0.374998	0.74	0.485	0	0	CTRL
FAM192A	0.345401	0.699	0.458	0	0	CTRL
CDH11	0.341448	0.719	0.467	0	0	CTRL
NAE1	0.347822	0.741	0.491	0	0	CTRL
CTCF	0.402188	0.592	0.322	0	0	CTRL
NIP7	0.490534	0.739	0.417	0	0	CTRL
NQO1	0.738927	0.989	0.784	0	0	CTRL
SF3B3	0.32499	0.652	0.451	0	0	CTRL
PSMD7	0.623348	0.96	0.618	0	0	CTRL
GABARAPL2	-0.667127	0.921	0.84	0	0	CTRL
CMC2	0.350956	0.828	0.562	0	0	CTRL
CENPN	0.557444	0.67	0.216	0	0	CTRL
WFDC1	-0.710658	0.17	0.528	0	0	CTRL
GINS2	0.606063	0.64	0.184	0	0	CTRL
MAP1LC3B	-0.919954	0.878	0.864	0	0	CTRL
CYBA	-1.15009	0.71	0.762	0	0	CTRL
ANKRD11	0.436251	0.9	0.608	0	0	CTRL
TUBB3	0.49565	0.926	0.644	0	0	CTRL
RFLNB	0.406698	0.79	0.473	0	0	CTRL
YWHAE	0.523196	0.999	0.889	0	0	CTRL
PRPF8	0.421618	0.833	0.557	0	0	CTRL
C1QBP	0.7733	0.991	0.744	0	0	CTRL
PIMREG	0.497102	0.534	0.112	0	0	CTRL
TXNDC17	-0.722115	0.983	0.9	0	0	CTRL
RNASEK	-0.979121	0.999	0.955	0	0	CTRL
GABARAP	-0.489214	0.994	0.906	0	0	CTRL
ELP5	0.346456	0.902	0.642	0	0	CTRL
EIF5A	0.516552	0.998	0.851	0	0	CTRL
EIF4A1	1.00974	1	0.904	0	0	CTRL
AURKB	0.521096	0.534	0.134	0	0	CTRL
MYH10	0.402644	0.626	0.359	0	0	CTRL
CENPV	0.431907	0.657	0.354	0	0	CTRL
SNHG29	-0.723803	0.999	0.975	0	0	CTRL
COPS3	0.331189	0.731	0.489	0	0	CTRL
SUZ12	0.453806	0.712	0.427	0	0	CTRL
ZNF207	0.463877	0.909	0.597	0	0	CTRL
PSMD11	0.493725	0.903	0.582	0	0	CTRL
DDX52	0.338937	0.701	0.458	0	0	CTRL
CDC6	0.361025	0.413	0.131	0	0	CTRL
TOP2A	1.24849	0.766	0.197	0	0	CTRL
IGFBP4	-1.38477	0.938	0.886	0	0	CTRL
SMARCE1	0.404802	0.896	0.621	0	0	CTRL
KRTAP1-5	-0.463369	0.037	0.279	0	0	CTRL
DNAJC7	0.447645	0.884	0.586	0	0	CTRL
VPS25	0.328233	0.778	0.532	0	0	CTRL
UBTF	0.40192	0.662	0.419	0	0	CTRL
GRN	-1.06609	0.665	0.7	0	0	CTRL
GJC1	0.335124	0.512	0.27	0	0	CTRL
KPNB1	0.940293	0.987	0.658	0	0	CTRL
COPZ2	-1.01563	0.686	0.826	0	0	CTRL
CBX1	0.584833	0.851	0.535	0	0	CTRL
COL1A1	0.7266	0.997	0.704	0	0	CTRL
MRPL27	0.422333	0.941	0.643	0	0	CTRL
LRRC59	0.559498	0.965	0.632	0	0	CTRL
LUC7L3	0.373614	0.861	0.564	0	0	CTRL
NME1	0.534659	0.999	0.854	0	0	CTRL
UTP18	0.352476	0.594	0.335	0	0	CTRL
SRSF1	0.451164	0.844	0.542	0	0	CTRL
SKA2	0.467715	0.918	0.639	0	0	CTRL
PRR11	0.586136	0.605	0.179	0	0	CTRL
CLTC	0.429792	0.972	0.667	0	0	CTRL
DDX5	0.520071	0.985	0.67	0	0	CTRL
PSMD12	0.526507	0.892	0.553	0	0	CTRL
NOL11	0.435424	0.661	0.345	0	0	CTRL
BPTF	0.329502	0.766	0.519	0	0	CTRL
KPNA2	1.2852	0.92	0.512	0	0	CTRL
ATP5PD	-0.63719	0.962	0.88	0	0	CTRL
NT5C	0.393841	0.806	0.538	0	0	CTRL
JPT1	0.922596	0.998	0.798	0	0	CTRL
SUMO2	0.742286	0.999	0.862	0	0	CTRL
H3F3B	1.37318	0.998	0.696	0	0	CTRL
SRSF2	0.983232	0.984	0.649	0	0	CTRL
TK1	0.960552	0.869	0.235	0	0	CTRL
BIRC5	1.13233	0.872	0.214	0	0	CTRL
TIMP2	-0.781355	0.977	0.821	0	0	CTRL
EIF4A3	0.420904	0.775	0.46	0	0	CTRL
ACTG1	0.728983	1	0.978	0	0	CTRL
CCDC137	0.341807	0.66	0.426	0	0	CTRL
MRPL12	0.640767	0.957	0.63	0	0	CTRL
ARHGDIA	0.388198	0.986	0.761	0	0	CTRL
ALYREF	0.90806	0.951	0.56	0	0	CTRL
CENPX	0.331039	0.963	0.725	0	0	CTRL
METRNL	0.373496	0.719	0.461	0	0	CTRL
USP14	0.510946	0.929	0.623	0	0	CTRL
TYMS	0.923158	0.876	0.391	0	0	CTRL
NDC80	0.434247	0.464	0.102	0	0	CTRL
SMCHD1	0.570223	0.811	0.48	0	0	CTRL
VAPA	0.628555	0.983	0.666	0	0	CTRL
TUBB6	0.400634	0.981	0.691	0	0	CTRL
SNRPD1	1.03027	0.991	0.658	0	0	CTRL
CDH2	0.633139	0.787	0.346	0	0	CTRL
TCF4	0.442652	0.694	0.392	0	0	CTRL
LMAN1	0.58011	0.962	0.659	0	0	CTRL
CYB5A	-0.723121	0.683	0.761	0	0	CTRL
PTBP1	0.324081	0.767	0.523	0	0	CTRL
DAZAP1	0.379727	0.727	0.472	0	0	CTRL
UQCR11	-1.12658	0.992	0.935	0	0	CTRL
LSM7	0.372555	0.993	0.744	0	0	CTRL
LMNB2	0.4442	0.664	0.376	0	0	CTRL
UHRF1	0.552613	0.611	0.216	0	0	CTRL
NDUFA11	-0.68479	0.997	0.935	0	0	CTRL
KHSRP	0.422412	0.766	0.495	0	0	CTRL
ELAVL1	0.337407	0.827	0.584	0	0	CTRL
RPS28	-0.637368	1	0.994	0	0	CTRL
MARCH2	-0.390739	0.156	0.486	0	0	CTRL
HNRNPM	0.861983	0.962	0.601	0	0	CTRL
UBL5	-0.886548	0.998	0.946	0	0	CTRL
DNMT1	0.977454	0.91	0.471	0	0	CTRL
ILF3	0.780066	0.893	0.524	0	0	CTRL
SMARCA4	0.444014	0.78	0.509	0	0	CTRL
CALR	0.424734	0.997	0.833	0	0	CTRL
RAD23A	0.409342	0.949	0.686	0	0	CTRL
IER2	0.681713	0.798	0.44	0	0	CTRL
DDX39A	0.800502	0.817	0.312	0	0	CTRL
BRD4	0.399997	0.779	0.509	0	0	CTRL
TPM4	0.686685	0.999	0.925	0	0	CTRL
NDUFA13	-0.652155	0.998	0.942	0	0	CTRL
UQCRFS1	0.346093	0.965	0.709	0	0	CTRL
UBA2	0.450141	0.81	0.53	0	0	CTRL
COX6B1	-0.728822	0.997	0.931	0	0	CTRL
ACTN4	0.394622	0.986	0.74	0	0	CTRL
HNRNPL	0.377165	0.717	0.442	0	0	CTRL
FBL	0.660936	0.825	0.426	0	0	CTRL
SNRPA	0.527966	0.78	0.46	0	0	CTRL
AXL	0.881528	0.979	0.615	0	0	CTRL
HNRNPUL1	0.492577	0.802	0.513	0	0	CTRL
RPS19	-0.648702	1	0.998	0	0	CTRL
RABAC1	-0.949858	0.988	0.921	0	0	CTRL
PAFAH1B3	0.559226	0.822	0.479	0	0	CTRL
PLAUR	0.559091	0.902	0.572	0	0	CTRL
TOMM40	0.636698	0.869	0.504	0	0	CTRL
CD3EAP	0.363879	0.503	0.232	0	0	CTRL
SELENOW	-0.909233	0.944	0.876	0	0	CTRL
BAX	0.351738	0.986	0.774	0	0	CTRL
RRAS	-0.64871	0.879	0.815	0	0	CTRL
BCL2L12	0.444382	0.634	0.313	0	0	CTRL
PRMT1	0.591433	0.976	0.72	0	0	CTRL
NUP62	0.383012	0.61	0.353	0	0	CTRL
C19orf48	0.392388	0.588	0.312	0	0	CTRL
NDUFA3	-0.758361	0.774	0.798	0	0	CTRL
UBE2S	1.31092	0.989	0.707	0	0	CTRL
TRIM28	0.510254	0.901	0.586	0	0	CTRL
FKBP1A	-1.2965	0.99	0.943	0	0	CTRL
SNRPB	1.06799	0.996	0.679	0	0	CTRL
NOP56	0.608024	0.865	0.506	0	0	CTRL
ITPA	0.321931	0.796	0.548	0	0	CTRL
CDC25B	0.347074	0.55	0.339	0	0	CTRL
PCNA	0.648656	0.82	0.47	0	0	CTRL
SNRPB2	0.588716	0.953	0.623	0	0	CTRL
SNX5	0.480707	0.796	0.513	0	0	CTRL
DTD1	0.332531	0.816	0.56	0	0	CTRL
XRN2	0.411174	0.896	0.613	0	0	CTRL
NXT1	0.336618	0.602	0.366	0	0	CTRL
CST3	-1.53579	0.98	0.885	0	0	CTRL
ID1	1.08973	0.935	0.446	0	0	CTRL
TPX2	1.36036	0.815	0.24	0	0	CTRL
MAP1LC3A	-0.741236	0.517	0.721	0	0	CTRL
MMP24OS	-0.952263	0.614	0.781	0	0	CTRL
RBM39	0.422175	0.931	0.621	0	0	CTRL
MYL9	-0.949075	0.998	0.974	0	0	CTRL
FAM83D	0.456595	0.435	0.131	0	0	CTRL
TOP1	0.700329	0.967	0.635	0	0	CTRL
SRSF6	0.345381	0.775	0.495	0	0	CTRL
YWHAB	0.591728	0.998	0.796	0	0	CTRL
UBE2C	1.34229	0.725	0.196	0	0	CTRL
CSE1L	0.514188	0.763	0.447	0	0	CTRL
AURKA	0.821757	0.637	0.27	0	0	CTRL
APCDD1L	0.625647	0.735	0.367	0	0	CTRL
ATP5F1E	-0.68573	1	0.974	0	0	CTRL
PSMA7	0.649254	0.999	0.857	0	0	CTRL
BTG3	0.332322	0.799	0.547	0	0	CTRL
USP16	0.378618	0.792	0.525	0	0	CTRL
CCT8	0.436148	0.976	0.724	0	0	CTRL
MAP3K7CL	-0.44778	0.138	0.463	0	0	CTRL
SOD1	-0.637372	0.995	0.931	0	0	CTRL
MIS18A	0.539257	0.613	0.216	0	0	CTRL
SON	0.450084	0.921	0.59	0	0	CTRL
CBR1	0.394572	0.907	0.628	0	0	CTRL
PSMG1	0.386555	0.749	0.472	0	0	CTRL
HMGN1	0.678511	0.998	0.844	0	0	CTRL
CSTB	-0.703495	0.998	0.949	0	0	CTRL
FAM207A	0.36896	0.76	0.504	0	0	CTRL
RANBP1	1.06247	0.998	0.795	0	0	CTRL
SDF2L1	0.371838	0.852	0.593	0	0	CTRL
SMARCB1	0.400264	0.692	0.405	0	0	CTRL
DDT	-0.696945	0.95	0.865	0	0	CTRL
PITPNB	0.326511	0.659	0.442	0	0	CTRL
EWSR1	0.342941	0.775	0.521	0	0	CTRL
UQCR10	-0.559065	0.998	0.913	0	0	CTRL
SELENOM	-1.24802	0.955	0.938	0	0	CTRL
YWHAH	0.586563	0.974	0.672	0	0	CTRL
HMGXB4	0.380239	0.642	0.389	0	0	CTRL
MCM5	0.464953	0.58	0.196	0	0	CTRL
DDX17	0.372358	0.917	0.587	0	0	CTRL
TOMM22	0.432938	0.956	0.705	0	0	CTRL
SYNGR1	-0.65679	0.49	0.667	0	0	CTRL
XRCC6	0.497005	0.969	0.693	0	0	CTRL
CENPM	0.606631	0.684	0.174	0	0	CTRL
RRP7A	0.484666	0.81	0.487	0	0	CTRL
CYB5R3	-0.782699	0.946	0.851	0	0	CTRL
TSPO	-0.794805	0.995	0.952	0	0	CTRL
GTSE1	0.725673	0.616	0.155	0	0	CTRL
AP1S2	0.604048	0.947	0.67	0	0	CTRL
RBBP7	0.549	0.863	0.543	0	0	CTRL
EIF1AX	0.924618	0.996	0.757	0	0	CTRL
SMS	0.725832	0.996	0.781	0	0	CTRL
SAT1	-0.834097	0.397	0.639	0	0	CTRL
DYNLT3	-0.910867	0.631	0.777	0	0	CTRL
DDX3X	0.411713	0.911	0.613	0	0	CTRL
MIR222HG	0.489839	0.652	0.265	0	0	CTRL
TIMP1	-1.89283	0.999	0.958	0	0	CTRL
RBM3	0.847592	0.985	0.715	0	0	CTRL
PLP2	0.397917	0.948	0.633	0	0	CTRL
SMC1A	0.658138	0.8	0.453	0	0	CTRL
MSN	0.440207	0.981	0.714	0	0	CTRL
KIF4A	0.501736	0.528	0.123	0	0	CTRL
NONO	0.554066	0.949	0.658	0	0	CTRL
XIST	0.568834	0.864	0.366	0	0	CTRL
TMSB15A	0.647623	0.605	0.067	0	0	CTRL
BEX3	-0.880764	0.998	0.957	0	0	CTRL
MORF4L2	0.556804	0.992	0.694	0	0	CTRL
PLS3	0.35699	0.904	0.621	0	0	CTRL
SLC25A5	0.718497	0.988	0.744	0	0	CTRL
RPL39	-0.561425	1	0.989	0	0	CTRL
NDUFA1	-1.00462	0.915	0.876	0	0	CTRL
MCTS1	0.484588	0.932	0.635	0	0	CTRL
HPRT1	0.35097	0.743	0.465	0	0	CTRL
RTL8C	-0.599102	0.922	0.827	0	0	CTRL
RBMX	0.737783	0.899	0.522	0	0	CTRL
HMGB3	0.844162	0.805	0.341	0	0	CTRL
BGN	0.576997	0.675	0.339	0	0	CTRL
SSR4	-0.712252	0.996	0.891	0	0	CTRL
DKC1	0.687424	0.815	0.42	0	0	CTRL
MT-ND6	0.430864	0.576	0.245	0	0	CTRL
RPL35A	-0.424529	0.999	0.985	1.28675e-307	4.70965e-303	CTRL
MEST	-0.358114	0.081	0.347	3.25135e-307	1.19003e-302	CTRL
BNIP3L	-0.702808	0.558	0.695	1.39237e-305	5.09622e-301	CTRL
FAM162A	-0.65114	0.389	0.628	1.65493e-305	6.0572e-301	CTRL
TPM1	0.385984	1	0.897	6.19253e-305	2.26653e-300	CTRL
RGS4	0.557191	0.437	0.214	4.40319e-304	1.61161e-299	CTRL
LRP10	-0.665173	0.614	0.675	5.67193e-304	2.07598e-299	CTRL
RPS27L	-0.564936	0.999	0.955	1.68719e-301	6.17527e-297	CTRL
FBN1	0.359675	0.878	0.577	3.29381e-298	1.20557e-293	CTRL
DMPK	-0.335072	0.094	0.363	1.1133e-297	4.0748e-293	CTRL
DAP	-0.653477	0.74	0.777	8.90744e-296	3.26021e-291	CTRL
TXNRD1	0.412398	0.963	0.724	2.6359e-295	9.64764e-291	CTRL
NDUFA2	-0.61064	0.891	0.819	4.03821e-295	1.47803e-290	CTRL
NFIC	0.34818	0.897	0.61	9.91669e-295	3.62961e-290	CTRL
ATP5MF	-0.497043	0.997	0.912	1.32284e-294	4.84172e-290	CTRL
ZNHIT1	-0.578206	0.931	0.836	5.86832e-294	2.14786e-289	CTRL
NUPR1	-0.894408	0.573	0.745	4.0963e-293	1.49929e-288	CTRL
PGPEP1	-0.342368	0.105	0.378	8.69737e-293	3.18332e-288	CTRL
MXRA7	-0.686332	0.832	0.8	1.67096e-291	6.11588e-287	CTRL
RRBP1	0.382567	0.957	0.651	1.81883e-291	6.65709e-287	CTRL
COX7C	-0.463524	0.997	0.922	1.93962e-291	7.09922e-287	CTRL
FKBP8	-0.690738	0.815	0.818	3.87952e-291	1.41994e-286	CTRL
S100A4	0.638768	0.889	0.682	6.08436e-290	2.22694e-285	CTRL
HIST1H2BC	-0.353447	0.093	0.353	8.85508e-290	3.24105e-285	CTRL
MYBL1	0.34564	0.588	0.354	4.15847e-288	1.52204e-283	CTRL
HSPB6	-1.05749	0.719	0.78	7.93969e-288	2.90601e-283	CTRL
FTL	-1.08243	1	0.999	2.55775e-287	9.36163e-283	CTRL
RHEB	0.323486	0.987	0.759	2.1467e-286	7.85714e-282	CTRL
UQCRB	-0.541669	0.991	0.917	2.05066e-285	7.50561e-281	CTRL
CYB5R1	-0.561455	0.358	0.595	2.83121e-285	1.03625e-280	CTRL
PCBD1	-0.666242	0.674	0.743	1.00837e-284	3.69072e-280	CTRL
FCGRT	-0.657258	0.463	0.649	2.60052e-284	9.51815e-280	CTRL
BASP1	0.356823	0.99	0.742	4.77227e-282	1.7467e-277	CTRL
LMO7	0.337116	0.91	0.609	9.87622e-282	3.6148e-277	CTRL
SNRPN	-0.670093	0.606	0.73	2.81019e-281	1.02856e-276	CTRL
MGST3	-0.562181	0.996	0.93	5.17027e-281	1.89237e-276	CTRL
UBA52	-0.490647	1	0.986	2.7505e-279	1.00671e-274	CTRL
HMGA1	0.326223	0.997	0.88	1.67354e-278	6.12533e-274	CTRL
HSPB1	-0.549235	0.999	0.952	1.67356e-278	6.12538e-274	CTRL
RPS27	-0.547204	1	0.99	3.13497e-276	1.14743e-271	CTRL
SUGCT	-0.700793	0.312	0.561	1.00946e-275	3.69473e-271	CTRL
RPL34	-0.399161	1	0.984	2.67579e-273	9.79366e-269	CTRL
ITGA6	0.35159	0.614	0.392	3.87177e-273	1.41711e-268	CTRL
HLA-C	-0.834646	0.907	0.77	1.16009e-272	4.24604e-268	CTRL
SYNPO	-0.397257	0.071	0.313	1.37822e-270	5.04441e-266	CTRL
MICOS10	-0.432783	0.995	0.887	1.39505e-268	5.10603e-264	CTRL
PSG4	-0.45009	0.253	0.521	1.26259e-267	4.6212e-263	CTRL
VCL	0.330018	0.955	0.62	1.93226e-266	7.07226e-262	CTRL
RNF7	-0.486424	0.979	0.861	5.09707e-266	1.86558e-261	CTRL
F3	-1.21903	0.438	0.606	2.40573e-265	8.80523e-261	CTRL
MXD4	-0.601603	0.5	0.666	4.09871e-265	1.50017e-260	CTRL
COX6A1	-0.490161	0.997	0.927	1.51974e-264	5.56239e-260	CTRL
TPT1	-0.598655	1	0.996	1.00717e-262	3.68635e-258	CTRL
NDUFB1	-0.568325	0.935	0.826	5.86999e-262	2.14848e-257	CTRL
SMIM27	-0.331933	0.167	0.439	2.86455e-261	1.04845e-256	CTRL
CLTB	-0.562849	0.941	0.83	3.07936e-261	1.12708e-256	CTRL
C18orf32	-0.549174	0.823	0.774	1.10654e-260	4.05005e-256	CTRL
SNAI2	0.328293	0.595	0.407	3.35813e-260	1.22911e-255	CTRL
RPL28	-0.385531	1	0.998	8.99215e-259	3.29122e-254	CTRL
TP53INP2	-0.362838	0.107	0.361	1.32368e-258	4.84481e-254	CTRL
NBL1	-0.418113	0.283	0.538	1.16199e-251	4.25298e-247	CTRL
KIF1C	-0.885339	0.374	0.617	5.54764e-251	2.03049e-246	CTRL
DDA1	-0.57387	0.766	0.754	7.11905e-251	2.60564e-246	CTRL
CTHRC1	0.455492	0.907	0.717	8.79862e-251	3.22038e-246	CTRL
H2AFJ	-0.706731	0.829	0.803	1.1972e-250	4.38186e-246	CTRL
POLD4	-0.553006	0.556	0.674	3.5603e-250	1.3031e-245	CTRL
TMEM219	-0.589872	0.735	0.755	4.51012e-250	1.65075e-245	CTRL
ATP5ME	-0.500985	0.987	0.877	1.7769e-248	6.50363e-244	CTRL
TMEM159	-0.357884	0.244	0.502	7.67573e-246	2.80939e-241	CTRL
COX5B	-0.479718	0.99	0.892	8.49827e-246	3.11045e-241	CTRL
FMN1	0.346463	0.59	0.394	5.25373e-245	1.92292e-240	CTRL
OAZ1	-0.400398	1	0.981	6.10018e-237	2.23273e-232	CTRL
TP53I11	-0.423883	0.186	0.426	4.20515e-235	1.53913e-230	CTRL
NDUFAF8	-0.504791	0.973	0.852	2.01879e-232	7.38898e-228	CTRL
RPL37A	-0.485905	1	0.99	1.54157e-231	5.6423e-227	CTRL
NDUFA7	-0.581342	0.858	0.808	3.50189e-231	1.28173e-226	CTRL
AK3	-0.536231	0.545	0.674	3.55096e-229	1.29969e-224	CTRL
COL4A1	0.372431	0.861	0.595	6.17792e-229	2.26118e-224	CTRL
RPL36	-0.335898	1	0.991	8.14075e-229	2.97959e-224	CTRL
STOM	-0.908212	0.593	0.649	1.03306e-227	3.7811e-223	CTRL
LARP6	-0.613465	0.886	0.826	3.36406e-227	1.23128e-222	CTRL
CHCHD10	-0.650425	0.685	0.732	1.05608e-226	3.86537e-222	CTRL
CERCAM	-0.484764	0.378	0.583	2.54076e-226	9.29944e-222	CTRL
GSN	-0.665309	0.7	0.737	2.66566e-226	9.75658e-222	CTRL
HOXB-AS3	-0.637967	0.5	0.65	3.84145e-226	1.40601e-221	CTRL
APOE	-0.676797	0.068	0.277	3.165e-225	1.15842e-220	CTRL
PRNP	-0.732692	0.573	0.658	5.25446e-225	1.92319e-220	CTRL
USP53	-0.480043	0.191	0.424	1.43741e-224	5.26105e-220	CTRL
DYNLRB1	-0.480787	0.983	0.878	3.70872e-224	1.35743e-219	CTRL
METRN	-0.731122	0.722	0.762	1.14542e-221	4.19235e-217	CTRL
RPS21	-0.341364	1	0.981	1.80784e-221	6.61689e-217	CTRL
MYH9	0.355899	0.96	0.701	3.6098e-221	1.32122e-216	CTRL
MRPS21	-0.430177	0.968	0.859	1.52558e-220	5.58379e-216	CTRL
TMA7	-0.35306	0.999	0.925	1.72867e-220	6.32711e-216	CTRL
NEDD8	-0.369227	0.999	0.933	8.79636e-219	3.21955e-214	CTRL
MTRNR2L12	-0.967408	0.149	0.363	5.0339e-216	1.84246e-211	CTRL
TCEA2	-0.43912	0.334	0.556	2.15453e-215	7.88581e-211	CTRL
NDUFS5	-0.433471	0.999	0.941	5.15311e-214	1.88609e-209	CTRL
CPA4	-0.511686	0.169	0.393	5.94454e-213	2.17576e-208	CTRL
MMP2	-0.843539	0.798	0.7	1.84544e-212	6.75449e-208	CTRL
TMEM158	-0.804025	0.814	0.796	1.05467e-211	3.8602e-207	CTRL
EGFL7	-0.343932	0.189	0.429	1.87648e-210	6.8681e-206	CTRL
ITM2C	-0.657352	0.589	0.679	3.85731e-210	1.41182e-205	CTRL
LBH	-0.708907	0.376	0.559	1.41492e-209	5.17876e-205	CTRL
HLA-E	-0.51377	0.549	0.649	6.23764e-209	2.28304e-204	CTRL
SARAF	-0.648056	0.697	0.705	1.52177e-207	5.56982e-203	CTRL
JOSD2	-0.574348	0.773	0.749	1.58258e-206	5.79238e-202	CTRL
AK1	-0.569134	0.848	0.805	2.77122e-206	1.01429e-201	CTRL
EIF4G2	0.32077	0.997	0.821	4.71134e-206	1.7244e-201	CTRL
PDE5A	-0.852657	0.549	0.651	3.17727e-204	1.16291e-199	CTRL
NOP10	-0.41452	0.994	0.884	3.98228e-204	1.45756e-199	CTRL
ETFB	-0.67519	0.846	0.816	9.02239e-203	3.30229e-198	CTRL
PPP1R14B-AS1	-0.341122	0.277	0.51	3.67206e-199	1.34401e-194	CTRL
TMEM59	-0.854843	0.946	0.802	7.77338e-199	2.84513e-194	CTRL
CHPF	-0.530232	0.468	0.606	3.35709e-198	1.22873e-193	CTRL
TMEM134	-0.390767	0.353	0.562	8.83141e-198	3.23239e-193	CTRL
ALDH2	-0.392457	0.209	0.444	2.12921e-197	7.79313e-193	CTRL
SNX3	-0.425337	0.985	0.888	3.17647e-196	1.16262e-191	CTRL
KRTAP2-3	-0.573156	0.15	0.361	6.03115e-194	2.20746e-189	CTRL
ISG15	-0.75028	0.691	0.739	1.41384e-192	5.1748e-188	CTRL
PDLIM2	-0.480672	0.961	0.839	3.41553e-192	1.25012e-187	CTRL
PNPLA2	-0.403313	0.376	0.57	9.57229e-192	3.50356e-187	CTRL
GPRC5A	-0.397938	0.192	0.407	1.07279e-191	3.92654e-187	CTRL
ANXA5	-0.509617	0.999	0.982	1.3829e-190	5.06157e-186	CTRL
SNHG8	-0.595466	0.874	0.818	2.83699e-190	1.03837e-185	CTRL
APOL2	-0.4141	0.159	0.384	3.84836e-190	1.40854e-185	CTRL
CCL2	-0.984008	0.115	0.307	4.20582e-190	1.53937e-185	CTRL
PALLD	-0.974774	0.907	0.838	6.00345e-190	2.19732e-185	CTRL
ETHE1	-0.554758	0.762	0.749	9.58591e-190	3.50854e-185	CTRL
ZSCAN16-AS1	-0.423177	0.355	0.568	2.74397e-189	1.00432e-184	CTRL
CCPG1	-0.347263	0.27	0.508	5.97583e-189	2.18721e-184	CTRL
ITGB5	-0.526931	0.467	0.599	3.76202e-188	1.37694e-183	CTRL
PLD3	-0.761497	0.707	0.702	5.19332e-188	1.90081e-183	CTRL
CTSD	-0.722215	0.816	0.723	6.38001e-187	2.33515e-182	CTRL
ISCU	-0.611505	0.825	0.771	1.45508e-184	5.32575e-180	CTRL
PAM	-0.523243	0.489	0.597	2.35733e-184	8.62805e-180	CTRL
HSBP1L1	-0.430047	0.444	0.616	4.9992e-184	1.82976e-179	CTRL
TRAPPC1	-0.428752	0.98	0.86	1.03144e-182	3.77519e-178	CTRL
GDE1	-0.44861	0.471	0.634	1.18414e-182	4.33407e-178	CTRL
ATP6V1E1	-0.500106	0.799	0.765	1.84347e-181	6.74728e-177	CTRL
CTSB	-0.71281	0.917	0.752	1.20029e-180	4.3932e-176	CTRL
BSG	-0.612627	0.979	0.808	5.75677e-180	2.10703e-175	CTRL
RRM2B	-0.348785	0.294	0.511	9.24742e-180	3.38465e-175	CTRL
CTTN	-0.481376	0.911	0.819	1.33988e-178	4.90408e-174	CTRL
EDF1	-0.367858	0.999	0.941	9.14859e-178	3.34847e-173	CTRL
LGALS3BP	-0.448708	0.311	0.512	2.87599e-177	1.05264e-172	CTRL
VAMP2	-0.488299	0.613	0.661	5.01559e-176	1.83576e-171	CTRL
FHL1	-0.432992	0.352	0.553	9.15995e-176	3.35263e-171	CTRL
RASSF3	-0.870209	0.355	0.57	3.50888e-175	1.28429e-170	CTRL
CCDC68	-0.380919	0.3	0.515	2.11546e-174	7.74281e-170	CTRL
MFAP4	-0.408552	0.203	0.421	6.26378e-169	2.29261e-164	CTRL
NIBAN2	-0.804162	0.708	0.742	6.32311e-169	2.31432e-164	CTRL
UQCRH	-0.339608	0.999	0.931	9.68012e-169	3.54302e-164	CTRL
PITX1	-0.401837	0.284	0.5	4.49745e-168	1.64611e-163	CTRL
IFI6	-0.402878	0.187	0.396	4.88363e-168	1.78746e-163	CTRL
DSTN	-0.402223	0.999	0.944	2.02764e-167	7.42135e-163	CTRL
TPM2	-0.62996	1	0.997	6.62742e-167	2.4257e-162	CTRL
TMEM8A	-0.341503	0.342	0.542	7.36439e-165	2.69544e-160	CTRL
YIPF3	-0.520787	0.758	0.723	2.17082e-163	7.94543e-159	CTRL
CCN1	0.341778	0.82	0.564	2.67343e-162	9.78501e-158	CTRL
CYTOR	-0.561299	0.975	0.826	3.77374e-162	1.38123e-157	CTRL
COX7B	-0.411541	0.979	0.866	5.10351e-162	1.86794e-157	CTRL
A1BG	-0.488934	0.552	0.643	1.57231e-161	5.75482e-157	CTRL
PAPPA	-0.439825	0.192	0.384	6.15527e-160	2.25289e-155	CTRL
RPS10	-0.343094	0.996	0.904	6.38784e-160	2.33801e-155	CTRL
VAT1	-0.467989	0.518	0.636	6.75468e-159	2.47228e-154	CTRL
LDOC1	-0.330185	0.262	0.485	1.52904e-158	5.59642e-154	CTRL
AP2M1	-0.386086	0.994	0.908	3.31127e-158	1.21196e-153	CTRL
G0S2	1.26097	0.324	0.168	3.78005e-158	1.38354e-153	CTRL
DNAJC4	-0.335993	0.32	0.531	1.92467e-157	7.04449e-153	CTRL
YPEL5	-0.364932	0.406	0.586	8.33181e-157	3.04952e-152	CTRL
CTSA	-0.621315	0.686	0.689	9.77546e-157	3.57791e-152	CTRL
TMEM230	-0.452481	0.897	0.812	1.77832e-156	6.50884e-152	CTRL
FADS3	-0.383584	0.323	0.517	7.58194e-155	2.77506e-150	CTRL
GNG11	-0.546605	0.969	0.877	2.71634e-154	9.94208e-150	CTRL
GAMT	-0.519671	0.66	0.717	2.72467e-153	9.97256e-149	CTRL
GDF15	-1.16865	0.168	0.35	3.23963e-153	1.18574e-148	CTRL
SNHG32	-0.522364	0.704	0.748	3.83332e-153	1.40303e-148	CTRL
MPC2	-0.524265	0.927	0.804	8.0368e-153	2.94155e-148	CTRL
PHLDA2	-0.570086	0.994	0.904	2.26583e-152	8.29318e-148	CTRL
RHOC	-0.376294	0.992	0.903	1.772e-151	6.48569e-147	CTRL
MRPL33	-0.431655	0.947	0.834	4.6439e-151	1.69971e-146	CTRL
LAMA4	-0.466271	0.296	0.477	5.47268e-151	2.00306e-146	CTRL
RIDA	-0.356701	0.271	0.476	1.3195e-150	4.82952e-146	CTRL
NENF	-0.503643	0.892	0.794	1.91026e-150	6.99175e-146	CTRL
TGM2	-0.522632	0.413	0.564	7.72615e-150	2.82785e-145	CTRL
PRDX2	-0.580007	0.982	0.906	1.30608e-149	4.7804e-145	CTRL
SMPD1	-0.429512	0.479	0.592	2.95949e-147	1.0832e-142	CTRL
DPM3	-0.446117	0.512	0.62	8.6207e-146	3.15526e-141	CTRL
JCAD	-0.584611	0.489	0.609	6.66183e-145	2.4383e-140	CTRL
EEF1G	-0.495844	0.999	0.961	3.47797e-144	1.27297e-139	CTRL
CTSK	-0.491593	0.157	0.336	6.79263e-144	2.48617e-139	CTRL
LAMTOR2	-0.461975	0.815	0.76	1.58971e-141	5.81851e-137	CTRL
COX6C	-0.370031	0.999	0.922	4.41516e-141	1.61599e-136	CTRL
CAV2	-0.457132	0.947	0.823	1.95075e-140	7.13993e-136	CTRL
NDUFA4	-0.359423	0.999	0.946	9.58454e-139	3.50804e-134	CTRL
NAA38	-0.46557	0.925	0.8	3.2451e-138	1.18774e-133	CTRL
DPP7	-0.493752	0.564	0.665	2.06717e-137	7.56606e-133	CTRL
MAPK3	-0.32382	0.321	0.517	3.48134e-136	1.27421e-131	CTRL
GSTP1	-0.456073	1	0.974	2.63087e-132	9.62925e-128	CTRL
RPS12	-0.335856	1	0.996	5.59645e-132	2.04836e-127	CTRL
VAMP3	-0.47627	0.721	0.747	2.00811e-130	7.34989e-126	CTRL
SEC62	-0.465544	0.911	0.749	6.60664e-129	2.41809e-124	CTRL
CCDC80	-0.983896	0.875	0.809	2.53929e-127	9.29407e-123	CTRL
CDIPT	-0.338868	0.434	0.59	1.31558e-126	4.81514e-122	CTRL
MAN1B1	-0.334937	0.356	0.528	9.84077e-126	3.60182e-121	CTRL
TLE5	-0.372692	0.932	0.815	1.15267e-125	4.21889e-121	CTRL
LGALS3	-0.621854	0.957	0.873	4.06813e-124	1.48898e-119	CTRL
TRAK2	-0.584048	0.309	0.504	2.31292e-123	8.46553e-119	CTRL
NPC2	-0.514796	0.94	0.805	8.21837e-123	3.00801e-118	CTRL
ZFAS1	-0.416859	0.984	0.866	1.09503e-122	4.0079e-118	CTRL
EPHX1	-0.375214	0.278	0.461	9.27818e-122	3.39591e-117	CTRL
IDS	-0.365581	0.439	0.593	1.23759e-121	4.52969e-117	CTRL
MYL12A	-0.497763	0.999	0.958	1.3726e-120	5.02386e-116	CTRL
ATP5F1D	-0.329855	0.994	0.895	1.75852e-120	6.43636e-116	CTRL
LINC02802	-0.471644	0.837	0.767	1.4103e-118	5.16183e-114	CTRL
RPL30	-0.364866	0.999	0.99	4.93534e-117	1.80639e-112	CTRL
TMSB4X	-0.499882	1	0.998	3.30314e-116	1.20898e-111	CTRL
CD59	-0.459737	0.998	0.887	1.87399e-115	6.85901e-111	CTRL
RHOQ	-0.438846	0.548	0.634	1.74538e-113	6.38826e-109	CTRL
DCN	-1.01466	0.888	0.801	2.95125e-113	1.08019e-108	CTRL
PVR	-0.358603	0.295	0.46	1.25286e-112	4.5856e-108	CTRL
TMEM205	-0.344893	0.416	0.564	1.27492e-112	4.66634e-108	CTRL
TMEM258	-0.380229	0.979	0.846	1.18061e-111	4.32115e-107	CTRL
BSCL2	-0.344784	0.413	0.577	2.08281e-110	7.62329e-106	CTRL
COX4I1	-0.379099	0.996	0.95	2.47147e-110	9.04582e-106	CTRL
GTF2H5	-0.36121	0.959	0.829	1.32336e-109	4.84365e-105	CTRL
SNHG6	-0.438425	0.933	0.819	4.81438e-108	1.76211e-103	CTRL
SH3BGRL3	-0.355947	1	0.986	7.44588e-108	2.72527e-103	CTRL
SHC1	-0.439072	0.826	0.726	5.52156e-107	2.02095e-102	CTRL
B2M	-0.512887	0.999	0.934	7.68094e-107	2.8113e-102	CTRL
PNRC1	-0.321235	0.271	0.43	3.2805e-105	1.2007e-100	CTRL
NDUFC1	-0.381638	0.941	0.809	1.40157e-104	5.12989e-100	CTRL
GAS5	-0.562649	0.93	0.841	2.25477e-104	8.25268e-100	CTRL
NORAD	-0.487151	0.63	0.639	1.00389e-103	3.67432e-99	CTRL
SAP18	-0.444494	0.989	0.9	7.72126e-102	2.82606e-97	CTRL
MICOS13	-0.344215	0.959	0.832	3.57779e-101	1.30951e-96	CTRL
IFT20	-0.387118	0.533	0.624	6.72704e-101	2.46217e-96	CTRL
REEP5	-0.543617	0.934	0.781	1.95092e-100	7.14055e-96	CTRL
PGAM1	-0.363348	0.958	0.845	7.73677e-99	2.83174e-94	CTRL
CAPN2	-0.401592	0.918	0.789	4.84602e-98	1.77369e-93	CTRL
ZMAT3	-0.406113	0.56	0.609	1.02356e-97	3.74634e-93	CTRL
TNFRSF11B	-0.529236	0.473	0.592	1.04256e-97	3.81589e-93	CTRL
FGF7	-0.585274	0.561	0.621	1.5078e-97	5.5187e-93	CTRL
PALM2-AKAP2	-0.865249	0.909	0.794	4.94098e-97	1.80845e-92	CTRL
NCSTN	-0.356027	0.47	0.568	1.27945e-96	4.6829e-92	CTRL
ANTXR1	-0.38047	0.475	0.579	3.01202e-96	1.10243e-91	CTRL
TP53TG1	-0.329217	0.457	0.58	5.94992e-94	2.17773e-89	CTRL
ROMO1	-0.418096	0.957	0.83	1.36632e-92	5.00087e-88	CTRL
PPDPF	-0.425615	0.999	0.949	3.56144e-92	1.30352e-87	CTRL
CAMK2N1	-0.349447	0.961	0.847	4.66095e-92	1.70596e-87	CTRL
BCAP31	-0.447961	0.91	0.76	1.47058e-91	5.38246e-87	CTRL
SURF1	-0.324011	0.426	0.564	3.03039e-91	1.10915e-86	CTRL
RAB13	-1.9536	0.92	0.87	4.57992e-90	1.6763e-85	CTRL
NUCB1	-0.397736	0.539	0.621	1.1967e-89	4.38004e-85	CTRL
GALNT5	-0.635924	0.587	0.627	2.10292e-89	7.69689e-85	CTRL
LAMP1	-0.527006	0.785	0.696	4.39489e-89	1.60857e-84	CTRL
ABLIM3	-0.461641	0.349	0.517	7.4521e-89	2.72754e-84	CTRL
FAM177A1	-0.375494	0.854	0.759	1.68809e-88	6.17859e-84	CTRL
RNF181	-0.36435	0.92	0.797	1.88607e-88	6.90321e-84	CTRL
MBOAT7	-0.383876	0.653	0.649	3.03636e-88	1.11134e-83	CTRL
TMEM47	-0.485969	0.485	0.564	1.53833e-87	5.63044e-83	CTRL
TMED3	-0.454468	0.782	0.725	3.91781e-86	1.43396e-81	CTRL
GDF11	-0.341422	0.237	0.405	6.10382e-86	2.23406e-81	CTRL
TGFBR2	-0.405142	0.592	0.613	2.47713e-84	9.06656e-80	CTRL
FILIP1L	-0.496559	0.49	0.565	7.96273e-84	2.91444e-79	CTRL
CAMLG	-0.342842	0.66	0.668	1.00839e-82	3.69079e-78	CTRL
ANXA4	-0.423522	0.487	0.607	1.67471e-82	6.12959e-78	CTRL
TNFRSF10D	-0.412162	0.454	0.552	4.79934e-82	1.7566e-77	CTRL
OPTN	-0.500609	0.697	0.712	6.90532e-82	2.52742e-77	CTRL
NIPAL3	-0.324204	0.479	0.583	7.14761e-82	2.6161e-77	CTRL
COMT	-0.459797	0.888	0.774	3.19896e-81	1.17085e-76	CTRL
TWSG1	-0.429427	0.739	0.674	2.31447e-80	8.47119e-76	CTRL
DAB2	-0.789281	0.778	0.671	2.87503e-80	1.05229e-75	CTRL
MTLN	-0.388651	0.736	0.693	6.19435e-80	2.26719e-75	CTRL
PCYOX1	-0.440563	0.605	0.605	2.47647e-79	9.06411e-75	CTRL
AC010642.2	-0.356472	0.574	0.63	4.28713e-79	1.56913e-74	CTRL
NME3	-0.363683	0.653	0.662	1.27279e-78	4.65856e-74	CTRL
OS9	-0.354597	0.53	0.611	3.60059e-78	1.31785e-73	CTRL
SGIP1	-0.513291	0.444	0.556	2.78419e-77	1.01904e-72	CTRL
HEG1	-0.346496	0.349	0.47	1.01723e-76	3.72316e-72	CTRL
MYL12B	-0.413904	0.999	0.964	1.41808e-76	5.1903e-72	CTRL
IGFBP6	-0.668075	0.88	0.772	6.62444e-76	2.42461e-71	CTRL
UBE2H	-0.369075	0.526	0.591	1.16601e-75	4.26771e-71	CTRL
MPV17	-0.398186	0.681	0.713	1.32609e-74	4.85363e-70	CTRL
MGAT5	-0.3548	0.43	0.518	1.91243e-72	6.9997e-68	CTRL
MYLK	-0.463162	0.922	0.774	1.32013e-71	4.83182e-67	CTRL
ARMCX3	-0.508708	0.689	0.695	7.36638e-71	2.69617e-66	CTRL
TMEM256	-0.386384	0.758	0.725	1.15849e-69	4.2402e-65	CTRL
SH3PXD2A	-0.523089	0.487	0.596	2.01824e-69	7.38697e-65	CTRL
OGFRL1	-0.372071	0.486	0.567	1.49427e-68	5.46917e-64	CTRL
SCP2	-0.409183	0.881	0.809	1.59156e-68	5.82525e-64	CTRL
C1R	-0.385571	0.244	0.372	7.5997e-68	2.78157e-63	CTRL
MVP	-0.404072	0.573	0.623	3.00825e-67	1.10105e-62	CTRL
SERINC3	-0.416343	0.766	0.707	5.12384e-67	1.87538e-62	CTRL
MTCH1	-0.32214	0.959	0.834	7.83717e-67	2.86848e-62	CTRL
CHCHD7	-0.406979	0.485	0.601	1.56034e-66	5.71101e-62	CTRL
NGRN	-0.362713	0.801	0.746	2.72649e-65	9.97922e-61	CTRL
PRSS23	-0.592875	0.903	0.751	1.29232e-63	4.73001e-59	CTRL
ASAH1	-0.366718	0.572	0.627	1.29096e-62	4.72503e-58	CTRL
TIMP3	-0.683137	0.798	0.675	1.13329e-61	4.14794e-57	CTRL
HLA-B	-0.470765	0.535	0.588	4.30696e-61	1.57639e-56	CTRL
CDKN2A	-0.548162	0.607	0.654	1.50467e-60	5.50724e-56	CTRL
SLC25A39	-0.32799	0.632	0.676	2.0967e-60	7.67414e-56	CTRL
NDUFV3	-0.377203	0.717	0.7	2.25661e-60	8.25941e-56	CTRL
LRPAP1	-0.589609	0.822	0.715	2.97387e-60	1.08847e-55	CTRL
CHID1	-0.401825	0.61	0.645	9.33234e-60	3.41573e-55	CTRL
SHISA5	-0.320765	0.662	0.657	1.70103e-58	6.22593e-54	CTRL
RAI14	-0.55237	0.869	0.761	2.14599e-58	7.85454e-54	CTRL
ITM2B	-0.616372	0.96	0.781	2.5358e-58	9.28127e-54	CTRL
UBB	-0.341986	0.999	0.958	1.48229e-57	5.42533e-53	CTRL
TMEM179B	-0.38439	0.708	0.66	3.15106e-56	1.15332e-51	CTRL
CLIC4	-0.360438	0.948	0.78	1.01438e-55	3.71273e-51	CTRL
ATP6AP2	-0.559028	0.792	0.697	1.63292e-55	5.97664e-51	CTRL
CSNK2B	-0.324866	0.922	0.791	3.29773e-54	1.207e-49	CTRL
GAL	-0.339781	0.206	0.317	4.11525e-54	1.50622e-49	CTRL
GSTM3	-0.459073	0.763	0.752	4.33699e-53	1.58738e-48	CTRL
TNS3	-0.514138	0.473	0.565	7.50719e-53	2.7477e-48	CTRL
STC2	-0.436795	0.473	0.542	2.53497e-52	9.27825e-48	CTRL
FKBP10	-0.386778	0.735	0.682	1.371e-50	5.01801e-46	CTRL
PLXNB2	-0.338657	0.494	0.546	2.89493e-50	1.05957e-45	CTRL
MEG3	-1.19799	0.838	0.591	1.6107e-49	5.89534e-45	CTRL
LY6E	-0.391052	0.887	0.773	1.87426e-48	6.85998e-44	CTRL
SDF4	-0.344953	0.871	0.715	2.12759e-48	7.78719e-44	CTRL
NBDY	-0.320198	0.822	0.745	1.78324e-45	6.52685e-41	CTRL
SVIL	-0.401382	0.482	0.553	4.43854e-45	1.62455e-40	CTRL
ADAM9	-0.409583	0.855	0.699	4.68558e-45	1.71497e-40	CTRL
NNMT	-0.412825	0.404	0.5	4.71299e-44	1.725e-39	CTRL
ATP6AP1	-0.334037	0.623	0.607	8.19003e-44	2.99763e-39	CTRL
MIR4435-2HG	-0.373503	0.8	0.705	2.46176e-43	9.01031e-39	CTRL
DCTN1	-0.477632	0.66	0.669	5.1658e-43	1.89074e-38	CTRL
SCOC	-0.370027	0.803	0.752	2.64035e-42	9.66393e-38	CTRL
HEXA	-0.341674	0.466	0.555	5.09869e-42	1.86617e-37	CTRL
ELL2	-0.329771	0.591	0.591	4.43035e-39	1.62155e-34	CTRL
VEGFB	-0.327499	0.65	0.668	5.82081e-38	2.13047e-33	CTRL
EHD2	-0.342607	0.74	0.657	4.45275e-37	1.62975e-32	CTRL
FHL2	-0.383185	0.843	0.701	9.09862e-36	3.33019e-31	CTRL
THY1	-0.456503	0.96	0.807	1.06854e-35	3.91098e-31	CTRL
AKR1B1	-0.591768	0.866	0.792	1.44292e-35	5.28123e-31	CTRL
CD63	-0.522813	0.999	0.938	2.40457e-34	8.80095e-30	CTRL
LOX	-0.520469	0.731	0.662	1.65151e-32	6.04468e-28	CTRL
CD9	-0.564255	0.864	0.711	7.84612e-32	2.87176e-27	CTRL
ITPRIPL2	-0.371312	0.571	0.612	9.68685e-32	3.54548e-27	CTRL
EDIL3	-0.329048	0.584	0.588	1.03107e-31	3.77382e-27	CTRL
MT-ND1	-0.334688	0.967	0.809	2.19162e-31	8.02154e-27	CTRL
LRP1	-0.409609	0.767	0.619	3.91016e-31	1.43116e-26	CTRL
EFEMP1	-0.407056	0.655	0.624	1.40969e-27	5.15961e-23	CTRL
SAMD4A	-0.413538	0.453	0.543	1.62165e-26	5.93541e-22	CTRL
ZEB1	-0.362579	0.801	0.698	2.3828e-26	8.72127e-22	CTRL
DYNC1LI2	-0.75128	0.773	0.75	1.34822e-25	4.93461e-21	CTRL
SQSTM1	-0.616262	0.948	0.82	5.98453e-24	2.1904e-19	CTRL
ZNF106	-0.650496	0.755	0.701	4.5679e-23	1.6719e-18	CTRL
MDM2	-0.374851	0.507	0.546	2.41636e-22	8.84412e-18	CTRL
ZFAND5	-0.49501	0.743	0.615	1.67983e-21	6.14833e-17	CTRL
NABP1	-0.889225	0.659	0.605	3.0746e-20	1.12533e-15	CTRL
TMEM30A	-0.32631	0.844	0.691	4.81216e-20	1.7613e-15	CTRL
LUM	-0.465448	0.565	0.58	2.37286e-18	8.68489e-14	CTRL
HIPK2	-0.569318	0.782	0.712	1.10163e-17	4.03207e-13	CTRL
MT-CYB	-0.356413	0.996	0.912	2.17695e-16	7.96785e-12	CTRL
HLA-A	-0.420395	0.847	0.699	2.98304e-14	1.09182e-09	CTRL
SH3BGRL	-0.361935	0.848	0.77	1.78462e-11	6.53189e-07	CTRL
TRPA1	-0.394775	0.448	0.476	3.54473e-11	1.29741e-06	CTRL
TFPI2	-0.668691	0.765	0.623	3.95061e-11	1.44596e-06	CTRL
FLNC	-0.333225	0.815	0.64	2.8643e-09	0.000104836	CTRL
MT2A	-0.542083	1	0.981	2.91897e-07	0.0106837	CTRL
CEBPD	-0.324907	0.486	0.497	4.95548e-07	0.0181376	CTRL
MAP4	-0.476781	0.914	0.79	6.21252e-07	0.0227384	CTRL
CENPB	-0.359135	0.481	0.544	1.28379e-06	0.0469879	CTRL
ENO1	-0.658007	0.951	0.999	0	0	RS
MRTO4	-0.547108	0.697	0.868	0	0	RS
MICOS10	0.452868	0.96	0.995	0	0	RS
NBL1	0.383889	0.676	0.283	0	0	RS
HNRNPR	-0.865105	0.832	0.979	0	0	RS
CLIC4	0.750653	0.935	0.948	0	0	RS
STMN1	-0.866407	0.953	0.997	0	0	RS
HMGN2	-1.38388	0.895	0.997	0	0	RS
NUDC	-0.465139	0.871	0.977	0	0	RS
ATP5IF1	0.815773	0.972	0.982	0	0	RS
SNHG3	-0.539133	0.576	0.781	0	0	RS
SERINC2	0.933077	0.889	0.642	0	0	RS
KHDRBS1	-0.921655	0.825	0.975	0	0	RS
MARCKSL1	-0.710149	0.755	0.934	0	0	RS
SFPQ	-0.975563	0.812	0.977	0	0	RS
YBX1	-0.481085	0.971	1	0	0	RS
EBNA1BP2	-0.495346	0.799	0.948	0	0	RS
CDC20	-0.771533	0.379	0.724	0	0	RS
NASP	-0.916194	0.647	0.915	0	0	RS
MAGOH	-0.492467	0.705	0.881	0	0	RS
TMEM59	0.78816	0.916	0.946	0	0	RS
SERBP1	-0.423191	0.937	0.996	0	0	RS
RPL5	-0.613804	0.984	1	0	0	RS
F3	1.46073	0.81	0.438	0	0	RS
PHGDH	-0.463972	0.248	0.55	0	0	RS
RBM8A	-0.468232	0.894	0.992	0	0	RS
TXNIP	0.806583	0.657	0.115	0	0	RS
ANP32E	-0.70332	0.774	0.925	0	0	RS
MLLT11	0.723768	0.81	0.585	0	0	RS
S100A11	0.67498	0.996	1	0	0	RS
S100A6	1.04111	1	1	0	0	RS
S100A13	0.683908	0.975	0.991	0	0	RS
ILF2	-0.779007	0.826	0.979	0	0	RS
CKS1B	-0.674415	0.747	0.926	0	0	RS
SSR2	-0.751207	0.867	0.996	0	0	RS
PEA15	0.72077	0.935	0.828	0	0	RS
MPC2	0.645042	0.923	0.927	0	0	RS
PRRX1	-0.534516	0.659	0.829	0	0	RS
PRRC2C	-0.534637	0.836	0.977	0	0	RS
PRDX6	0.700873	0.987	0.996	0	0	RS
QSOX1	0.655041	0.861	0.82	0	0	RS
ASPM	-0.828813	0.392	0.701	0	0	RS
CYB5R1	0.442787	0.725	0.358	0	0	RS
SNRPE	-0.470803	0.915	0.995	0	0	RS
NUCKS1	-0.64295	0.933	0.997	0	0	RS
CENPF	-1.14111	0.433	0.815	0	0	RS
CAPN2	0.55435	0.923	0.918	0	0	RS
SRP9	-0.391513	0.948	0.996	0	0	RS
PARP1	-0.493799	0.689	0.846	0	0	RS
GUK1	0.461081	0.975	0.997	0	0	RS
HNRNPU	-0.886315	0.871	0.986	0	0	RS
RPS7	-0.391664	0.992	1	0	0	RS
SOX11	-0.94403	0.084	0.671	0	0	RS
HPCAL1	0.412775	0.723	0.356	0	0	RS
PDIA6	-0.482443	0.894	0.991	0	0	RS
OST4	0.725651	0.984	0.999	0	0	RS
SRSF7	-0.834903	0.802	0.981	0	0	RS
CALM2	0.555227	0.993	0.999	0	0	RS
CCT4	-0.445248	0.887	0.986	0	0	RS
TPRKB	-0.466379	0.706	0.851	0	0	RS
VAMP5	0.598901	0.929	0.868	0	0	RS
CYTOR	0.722413	0.928	0.975	0	0	RS
MTLN	0.587111	0.888	0.736	0	0	RS
LIMS2	0.419617	0.7	0.314	0	0	RS
DPP4	0.377298	0.482	0.06	0	0	RS
HNRNPA3	-0.698379	0.9	0.987	0	0	RS
HSPD1	-0.874151	0.903	0.996	0	0	RS
XRCC5	-0.797653	0.873	0.987	0	0	RS
IGFBP5	1.65078	0.912	0.684	0	0	RS
SERPINE2	1.26194	0.874	0.674	0	0	RS
NCL	-0.908287	0.923	0.995	0	0	RS
PTMA	-1.47142	0.978	1	0	0	RS
COPS9	0.499558	0.955	0.979	0	0	RS
DTYMK	-0.630085	0.816	0.958	0	0	RS
BRK1	0.462633	0.961	0.987	0	0	RS
LSM3	-0.43471	0.901	0.983	0	0	RS
RPL15	-0.4981	0.991	1	0	0	RS
RPSA	-0.6204	0.99	1	0	0	RS
TMEM158	1.02276	0.917	0.814	0	0	RS
TKT	-0.98523	0.782	0.976	0	0	RS
MYLK	0.957623	0.941	0.922	0	0	RS
ITGB5	0.756064	0.811	0.467	0	0	RS
MGLL	0.672675	0.866	0.682	0	0	RS
MRPL3	-0.453437	0.736	0.882	0	0	RS
RNF7	0.520217	0.951	0.979	0	0	RS
PTX3	-0.954703	0.239	0.637	0	0	RS
SMC4	-0.880787	0.537	0.867	0	0	RS
SEC62	0.540033	0.888	0.911	0	0	RS
MRPL47	-0.499749	0.824	0.966	0	0	RS
OSTN-AS1	0.80295	0.641	0.09	0	0	RS
CCDC50	0.92414	0.919	0.907	0	0	RS
C4orf48	0.813164	0.951	0.95	0	0	RS
RPL9	-0.327776	0.992	1	0	0	RS
PAICS	-0.683776	0.713	0.918	0	0	RS
IGFBP7	1.71017	0.953	0.986	0	0	RS
CCNI	-0.433632	0.904	0.99	0	0	RS
HNRNPD	-0.899608	0.815	0.977	0	0	RS
HNRNPDL	-0.765476	0.853	0.988	0	0	RS
ADH5	-0.457033	0.84	0.954	0	0	RS
H2AFZ	-1.16342	0.918	1	0	0	RS
USP53	0.533812	0.568	0.191	0	0	RS
C4orf3	0.735776	0.949	0.956	0	0	RS
MAD2L1	-0.744899	0.505	0.838	0	0	RS
RPS3A	-0.468315	0.992	0.999	0	0	RS
HMGB2	-1.13804	0.524	0.833	0	0	RS
CCT5	-0.684157	0.864	0.987	0	0	RS
DAP	0.640258	0.908	0.74	0	0	RS
CCNB1	-1.20548	0.469	0.821	0	0	RS
EDIL3	0.690434	0.827	0.584	0	0	RS
GLRX	0.648597	0.872	0.729	0	0	RS
PAM	0.575239	0.769	0.489	0	0	RS
MAN2A1	0.51407	0.785	0.513	0	0	RS
LMNB1	-0.584785	0.254	0.609	0	0	RS
UQCRQ	0.519188	0.97	0.995	0	0	RS
DDX46	-0.528071	0.782	0.932	0	0	RS
TGFBI	1.49963	0.913	0.835	0	0	RS
SMIM3	0.368051	0.666	0.284	0	0	RS
ATOX1	0.854523	0.971	0.979	0	0	RS
PTTG1	-1.00441	0.667	0.923	0	0	RS
NPM1	-1.01837	0.971	0.999	0	0	RS
ATP6V0E1	0.820954	0.969	0.995	0	0	RS
CLTB	0.726003	0.946	0.941	0	0	RS
HNRNPAB	-0.609575	0.879	0.987	0	0	RS
RACK1	-0.492352	0.985	1	0	0	RS
DEK	-0.581002	0.855	0.977	0	0	RS
HIST1H2AC	0.673983	0.641	0.234	0	0	RS
TUBB	-0.542848	0.943	0.999	0	0	RS
HLA-C	0.837342	0.9	0.907	0	0	RS
DDX39B	-0.559376	0.747	0.917	0	0	RS
SRSF3	-0.780642	0.866	0.994	0	0	RS
HSP90AB1	-1.05824	0.958	0.999	0	0	RS
OGFRL1	0.693766	0.786	0.486	0	0	RS
EEF1A1	-0.340394	0.998	1	0	0	RS
MARCKS	-1.402	0.854	0.997	0	0	RS
SERINC1	0.635074	0.867	0.707	0	0	RS
CENPW	-0.704318	0.575	0.899	0	0	RS
PERP	0.776362	0.895	0.83	0	0	RS
NUDT1	-0.536643	0.706	0.882	0	0	RS
RPA3	-0.539549	0.692	0.889	0	0	RS
NDUFA4	0.473194	0.982	0.999	0	0	RS
TOMM7	0.641975	0.97	0.993	0	0	RS
HNRNPA2B1	-0.787592	0.934	0.999	0	0	RS
LSM5	-0.519238	0.903	0.987	0	0	RS
PSMA2	-0.413868	0.944	0.997	0	0	RS
H2AFV	-0.787919	0.87	0.989	0	0	RS
SEC61G	0.54972	0.988	1	0	0	RS
CCT6A	-0.599095	0.88	0.99	0	0	RS
SBDS	0.540048	0.927	0.931	0	0	RS
MCM7	-0.576143	0.478	0.792	0	0	RS
PCOLCE	-0.579915	0.644	0.887	0	0	RS
CAV2	0.732208	0.94	0.947	0	0	RS
WNT16	0.33791	0.469	0.091	0	0	RS
ATP6V1F	0.579541	0.953	0.956	0	0	RS
CALD1	0.912001	0.99	0.999	0	0	RS
PTN	-0.652088	0.725	0.926	0	0	RS
NDUFB2	0.607757	0.969	0.993	0	0	RS
SSBP1	-0.505801	0.903	0.993	0	0	RS
CLU	0.973306	0.829	0.5	0	0	RS
PLAT	0.936516	0.69	0.269	0	0	RS
PRKDC	-0.561564	0.824	0.968	0	0	RS
GGH	-0.469897	0.65	0.854	0	0	RS
TRAM1	0.681848	0.916	0.925	0	0	RS
RPL7	-0.534551	0.98	1	0	0	RS
FABP5	-1.27088	0.564	0.947	0	0	RS
EIF3E	-0.576199	0.904	0.993	0	0	RS
RAD21	-0.621938	0.777	0.924	0	0	RS
MRPL13	-0.430054	0.813	0.937	0	0	RS
EEF1D	-0.443001	0.972	0.999	0	0	RS
RPL8	-0.369135	0.993	1	0	0	RS
DNAJA1	-0.426392	0.872	0.974	0	0	RS
HNRNPK	-0.465446	0.919	0.995	0	0	RS
CKS2	-1.09158	0.776	0.947	0	0	RS
ANP32B	-0.865698	0.852	0.984	0	0	RS
TBC1D2	0.53979	0.684	0.271	0	0	RS
GABBR2	0.419086	0.639	0.221	0	0	RS
SMC2	-0.669834	0.554	0.818	0	0	RS
ATP6V1G1	0.817474	0.954	0.971	0	0	RS
ENG	0.506726	0.826	0.645	0	0	RS
C9orf16	0.659613	0.93	0.85	0	0	RS
SET	-0.751299	0.939	0.998	0	0	RS
RPL7A	-0.525009	0.991	1	0	0	RS
NPDC1	0.866439	0.836	0.417	0	0	RS
TUBB4B	-0.655367	0.875	0.996	0	0	RS
ITGB1	0.58283	0.947	0.998	0	0	RS
CSGALNACT2	0.419372	0.65	0.252	0	0	RS
HNRNPF	-0.524967	0.781	0.937	0	0	RS
ZNF22	-0.495075	0.418	0.704	0	0	RS
HNRNPH3	-0.697229	0.838	0.967	0	0	RS
PSAP	0.766007	0.864	0.722	0	0	RS
PLAC9	-0.531912	0.389	0.7	0	0	RS
KIF20B	-0.621338	0.452	0.723	0	0	RS
PDLIM1	0.734912	0.94	0.918	0	0	RS
ATP5MD	0.683745	0.976	0.997	0	0	RS
SMC3	-0.493004	0.694	0.864	0	0	RS
MKI67	-0.743848	0.38	0.72	0	0	RS
POLR2L	0.876749	0.985	0.997	0	0	RS
CTSD	0.678068	0.877	0.816	0	0	RS
CD81	0.788485	0.927	0.995	0	0	RS
PHLDA2	0.996406	0.983	0.994	0	0	RS
DKK3	1.01066	0.917	0.945	0	0	RS
LDHA	-0.424837	0.952	0.999	0	0	RS
EIF3M	-0.450628	0.814	0.949	0	0	RS
CD44	0.949087	0.934	0.993	0	0	RS
PAMR1	0.611858	0.722	0.273	0	0	RS
MDK	-1.07773	0.749	0.968	0	0	RS
SSRP1	-0.543242	0.704	0.868	0	0	RS
PPP1R14B	-0.405892	0.977	0.999	0	0	RS
PPP1R14B-AS1	0.361689	0.67	0.277	0	0	RS
EFEMP2	0.573553	0.912	0.858	0	0	RS
BANF1	-0.504883	0.931	0.996	0	0	RS
POLD4	0.498331	0.818	0.556	0	0	RS
CCND1	0.99264	0.986	0.992	0	0	RS
RPS3	-0.450909	0.99	1	0	0	RS
SERPINH1	-0.817979	0.814	0.976	0	0	RS
MMP1	1.0927	0.781	0.343	0	0	RS
MMP3	0.842605	0.422	0.022	0	0	RS
ATP5MG	0.519687	0.982	0.998	0	0	RS
HSPA8	-0.555502	0.943	0.999	0	0	RS
CD9	0.931364	0.894	0.864	0	0	RS
MRPL51	-0.412725	0.929	0.998	0	0	RS
PHB2	-0.420706	0.836	0.951	0	0	RS
GABARAPL1	0.601109	0.69	0.213	0	0	RS
MAGOHB	-0.455411	0.74	0.89	0	0	RS
LDHB	-0.743021	0.94	0.999	0	0	RS
TMTC1	0.664287	0.705	0.22	0	0	RS
TUBA1B	-0.815424	0.931	0.999	0	0	RS
COX14	0.603774	0.883	0.719	0	0	RS
HNRNPA1	-0.902788	0.911	0.996	0	0	RS
RPL41	0.512562	0.999	1	0	0	RS
MYL6	0.461221	0.997	1	0	0	RS
PTGES3	-0.559353	0.925	0.997	0	0	RS
NACA	-0.483446	0.985	1	0	0	RS
CDK4	-0.605426	0.793	0.941	0	0	RS
CCT2	-0.600043	0.863	0.981	0	0	RS
NAP1L1	-0.37575	0.967	0.998	0	0	RS
CSRP2	-0.682858	0.678	0.896	0	0	RS
TMPO	-0.773533	0.567	0.849	0	0	RS
SLC25A3	-0.387318	0.97	0.999	0	0	RS
NUP37	-0.466601	0.528	0.771	0	0	RS
HSP90B1	-0.52371	0.908	0.997	0	0	RS
RPL6	-0.321621	0.992	1	0	0	RS
RPLP0	-0.353651	0.993	1	0	0	RS
RAN	-0.585203	0.968	1	0	0	RS
HMGB1	-1.24605	0.971	1	0	0	RS
EXOSC8	-0.565105	0.545	0.799	0	0	RS
RGCC	0.639508	0.592	0.166	0	0	RS
COMMD6	0.663931	0.966	0.982	0	0	RS
FAM155A	0.410675	0.684	0.323	0	0	RS
GAS6	1.1165	0.947	0.955	0	0	RS
APEX1	-0.489274	0.793	0.93	0	0	RS
HNRNPC	-0.714106	0.913	0.995	0	0	RS
SUPT16H	-0.505174	0.737	0.881	0	0	RS
LRP10	0.66256	0.838	0.614	0	0	RS
FAM177A1	0.495534	0.911	0.854	0	0	RS
PNN	-0.520956	0.667	0.845	0	0	RS
CDKN3	-0.824964	0.433	0.829	0	0	RS
DLGAP5	-0.769314	0.367	0.724	0	0	RS
ERH	-0.382904	0.941	0.998	0	0	RS
RBM25	-0.437188	0.771	0.9	0	0	RS
NDUFB1	0.600564	0.95	0.935	0	0	RS
IFI27L2	0.842313	0.943	0.836	0	0	RS
HSP90AA1	-0.806671	0.983	1	0	0	RS
NOP10	0.460075	0.964	0.994	0	0	RS
SRP14	0.681554	0.989	0.999	0	0	RS
NUSAP1	-0.695849	0.414	0.761	0	0	RS
SERF2	0.918283	0.997	1	0	0	RS
DUT	-0.539094	0.844	0.958	0	0	RS
CCNB2	-0.620909	0.352	0.692	0	0	RS
PPIB	-0.71566	0.927	0.998	0	0	RS
PCLAF	-0.650637	0.551	0.922	0	0	RS
HACD3	-0.51982	0.719	0.879	0	0	RS
RPL4	-0.370247	0.96	1	0	0	RS
ANP32A	-0.590512	0.649	0.85	0	0	RS
COMMD4	-0.458259	0.781	0.905	0	0	RS
SEC11A	-0.460506	0.922	0.995	0	0	RS
MFGE8	1.5651	0.926	0.874	0	0	RS
PRC1	-0.723972	0.467	0.829	0	0	RS
ARRDC4	0.358187	0.407	0.038	0	0	RS
UBE2I	-0.524303	0.864	0.977	0	0	RS
HAGH	0.488701	0.789	0.437	0	0	RS
RPS2	-0.784227	0.995	1	0	0	RS
ATP6V0C	0.620887	0.926	0.971	0	0	RS
ELOB	0.550649	0.976	0.999	0	0	RS
VKORC1	0.625173	0.94	0.977	0	0	RS
FUS	-0.623957	0.768	0.944	0	0	RS
MMP2	1.019	0.877	0.798	0	0	RS
MT2A	1.29061	0.999	1	0	0	RS
NQO1	-1.00937	0.884	0.989	0	0	RS
WFDC1	1.13767	0.789	0.17	0	0	RS
RPL13	-0.388082	0.999	1	0	0	RS
TUBB3	-0.597752	0.778	0.926	0	0	RS
C1QBP	-0.587079	0.896	0.991	0	0	RS
TXNDC17	0.649322	0.962	0.983	0	0	RS
RNASEK	0.71882	0.975	0.999	0	0	RS
EIF4A1	-0.822359	0.97	1	0	0	RS
VAMP2	0.580874	0.849	0.613	0	0	RS
KRTAP1-5	0.414252	0.323	0.037	0	0	RS
KRTAP2-3	0.714136	0.492	0.15	0	0	RS
GRN	0.896843	0.854	0.665	0	0	RS
COPZ2	0.627048	0.89	0.686	0	0	RS
DDX5	-0.424077	0.863	0.985	0	0	RS
JPT1	-0.574567	0.931	0.998	0	0	RS
SUMO2	-0.427279	0.964	0.999	0	0	RS
H3F3B	-0.819068	0.877	0.998	0	0	RS
SRSF2	-0.583294	0.876	0.984	0	0	RS
SYNGR2	0.43849	0.647	0.197	0	0	RS
TK1	-0.617951	0.511	0.869	0	0	RS
BIRC5	-0.59512	0.505	0.872	0	0	RS
TIMP2	0.915987	0.927	0.977	0	0	RS
ALYREF	-0.656543	0.778	0.951	0	0	RS
TYMS	-0.589883	0.545	0.876	0	0	RS
MYL12A	0.668483	0.991	0.999	0	0	RS
SNRPD1	-0.627921	0.865	0.991	0	0	RS
C18orf32	0.59518	0.913	0.823	0	0	RS
RPL17	-0.366912	0.992	1	0	0	RS
CCDC68	0.585708	0.706	0.3	0	0	RS
HSBP1L1	0.463266	0.789	0.444	0	0	RS
FSTL3	0.606808	0.781	0.439	0	0	RS
UQCR11	0.866163	0.975	0.992	0	0	RS
NDUFA11	0.491216	0.973	0.997	0	0	RS
RPS28	0.484699	0.996	1	0	0	RS
HNRNPM	-0.669936	0.807	0.962	0	0	RS
UBL5	0.746048	0.982	0.998	0	0	RS
DNMT1	-0.580115	0.742	0.91	0	0	RS
ILF3	-0.544557	0.748	0.893	0	0	RS
DDX39A	-0.600272	0.532	0.817	0	0	RS
DDA1	0.651403	0.909	0.766	0	0	RS
COX6B1	0.590566	0.975	0.997	0	0	RS
RPS16	-0.329598	0.989	1	0	0	RS
FBL	-0.527984	0.628	0.825	0	0	RS
PAFAH1B3	-0.441797	0.671	0.822	0	0	RS
PSG4	0.351634	0.648	0.253	0	0	RS
ETHE1	0.763918	0.899	0.762	0	0	RS
SELENOW	0.831862	0.957	0.944	0	0	RS
RRAS	0.516444	0.918	0.879	0	0	RS
PRMT1	-0.575997	0.864	0.976	0	0	RS
RPS9	-0.461888	0.992	1	0	0	RS
A1BG	0.529642	0.815	0.552	0	0	RS
FKBP1A	1.39013	0.985	0.99	0	0	RS
SNRPB	-0.673245	0.869	0.996	0	0	RS
DSTN	0.633711	0.985	0.999	0	0	RS
CST3	1.39651	0.936	0.98	0	0	RS
TPX2	-0.832174	0.516	0.815	0	0	RS
MAP1LC3A	0.549718	0.817	0.517	0	0	RS
MYL9	1.1325	0.995	0.998	0	0	RS
TGM2	0.676988	0.759	0.413	0	0	RS
TOP1	-0.594473	0.837	0.967	0	0	RS
ATP5F1E	0.747337	0.992	1	0	0	RS
PSMA7	-0.458026	0.955	0.999	0	0	RS
MAP3K7CL	0.541692	0.64	0.138	0	0	RS
HMGN1	-0.51567	0.959	0.998	0	0	RS
CSTB	0.633508	0.979	0.998	0	0	RS
RANBP1	-0.631259	0.946	0.998	0	0	RS
CHCHD10	0.842619	0.902	0.685	0	0	RS
UQCR10	0.52599	0.969	0.998	0	0	RS
SELENOM	0.74898	0.962	0.955	0	0	RS
TIMP3	0.969077	0.859	0.798	0	0	RS
RPL3	-0.407438	0.99	1	0	0	RS
SYNGR1	0.581591	0.789	0.49	0	0	RS
CYB5R3	0.65543	0.927	0.946	0	0	RS
EIF1AX	-0.429789	0.936	0.996	0	0	RS
DYNLT3	1.011	0.912	0.631	0	0	RS
TIMP1	1.74934	0.969	0.999	0	0	RS
RBM3	-0.600548	0.906	0.985	0	0	RS
RPS4X	-0.55194	0.99	1	0	0	RS
XIST	-0.496527	0.54	0.864	0	0	RS
TMSB15A	-0.608311	0.136	0.605	0	0	RS
BEX3	0.678617	0.98	0.998	0	0	RS
SLC25A5	-0.580612	0.891	0.988	0	0	RS
RPL39	0.60198	0.995	1	0	0	RS
NDUFA1	0.833133	0.952	0.915	0	0	RS
RTL8C	0.514068	0.939	0.922	0	0	RS
RBMX	-0.494963	0.747	0.899	0	0	RS
HMGB3	-0.784336	0.47	0.805	0	0	RS
RPL10	-0.448677	0.998	1	0	0	RS
MT-ATP6	-0.64895	0.933	0.994	0	0	RS
NDUFA3	0.521945	0.909	0.774	1.57214e-307	5.75421e-303	RS
H1FX	-0.592448	0.699	0.853	4.35756e-305	1.59491e-300	RS
PICALM	0.524923	0.85	0.716	3.76042e-304	1.37635e-299	RS
MT-CO1	-0.498037	0.956	0.998	7.44763e-303	2.72591e-298	RS
XRCC6	-0.438577	0.844	0.969	4.38521e-302	1.60503e-297	RS
UBE2S	-0.635737	0.912	0.989	9.30851e-302	3.40701e-297	RS
PHF14	-0.401837	0.356	0.588	2.83766e-301	1.03861e-296	RS
CCT3	-0.435129	0.892	0.986	7.15745e-301	2.6197e-296	RS
SAT1	0.540191	0.735	0.397	2.87908e-300	1.05377e-295	RS
MT-CO3	-0.538738	0.933	0.996	2.43246e-299	8.90304e-295	RS
RABAC1	0.619828	0.955	0.988	5.33269e-299	1.95182e-294	RS
SFRP1	-0.715155	0.847	0.979	1.26984e-298	4.64772e-294	RS
CBX3	-0.398626	0.911	0.989	3.91507e-297	1.43295e-292	RS
CLDN1	0.339555	0.512	0.167	4.92582e-297	1.8029e-292	RS
ACTL6A	-0.427237	0.637	0.795	1.29796e-296	4.75065e-292	RS
HLA-E	0.460999	0.805	0.549	4.61693e-296	1.68984e-291	RS
PSMA3	-0.421103	0.866	0.985	1.56619e-295	5.73242e-291	RS
KRR1	-0.414144	0.677	0.819	1.70604e-294	6.24429e-290	RS
PTGS1	0.386745	0.66	0.298	2.19502e-294	8.034e-290	RS
TOMM22	-0.391604	0.867	0.956	8.42198e-293	3.08253e-288	RS
KPNA2	-0.681637	0.781	0.92	3.82688e-292	1.40068e-287	RS
PSIP1	-0.428107	0.586	0.797	6.14713e-292	2.24991e-287	RS
VIM	-0.362841	0.998	1	6.56556e-291	2.40306e-286	RS
TOMM40	-0.433559	0.729	0.869	1.4195e-290	5.1955e-286	RS
ARGLU1	-0.39738	0.769	0.911	6.78348e-290	2.48282e-285	RS
HINT1	0.415103	0.991	1	2.44854e-289	8.96191e-285	RS
ARF4	0.408816	0.979	0.998	4.4352e-289	1.62333e-284	RS
CCNA2	-0.615291	0.445	0.745	5.73265e-289	2.09821e-284	RS
H3F3A	-0.335369	0.96	0.999	1.17845e-288	4.31324e-284	RS
PITX1	0.440457	0.654	0.284	1.4039e-287	5.13842e-283	RS
GABARAPL2	0.486855	0.932	0.921	1.88804e-287	6.91041e-283	RS
TWSG1	0.497763	0.857	0.739	5.29874e-287	1.93939e-282	RS
EDN1	0.382378	0.448	0.127	8.68904e-287	3.18028e-282	RS
SPOCD1	0.514714	0.791	0.535	9.01535e-286	3.29971e-281	RS
DDT	0.501366	0.946	0.95	2.32317e-284	8.50304e-280	RS
SH3BGRL3	0.445109	0.996	1	2.67746e-284	9.79978e-280	RS
HMMR	-0.571017	0.392	0.708	2.97931e-284	1.09046e-279	RS
SNRPC	-0.391856	0.838	0.946	3.65639e-283	1.33828e-278	RS
TUBA1C	-0.508546	0.895	0.997	9.76379e-283	3.57365e-278	RS
NME1	-0.368779	0.949	0.999	2.78888e-282	1.02076e-277	RS
STOML2	-0.402792	0.833	0.939	4.10465e-282	1.50234e-277	RS
EIF3F	-0.39079	0.9	0.976	5.73592e-282	2.09941e-277	RS
RSL1D1	-0.420425	0.807	0.918	7.05671e-281	2.58283e-276	RS
CHPF	0.475006	0.762	0.468	1.4277e-280	5.22553e-276	RS
ACTA2	0.859557	0.924	0.826	3.09885e-280	1.13421e-275	RS
ZNHIT1	0.461511	0.936	0.931	3.24671e-280	1.18833e-275	RS
MGAT4B	0.506651	0.86	0.672	9.10217e-280	3.33148e-275	RS
SNRNP40	-0.398287	0.655	0.795	5.74788e-279	2.10378e-274	RS
PSMA4	-0.371298	0.914	0.994	2.49484e-278	9.13138e-274	RS
MRPS24	-0.379176	0.93	0.994	2.56353e-278	9.38278e-274	RS
TAGLN	0.594588	0.997	1	4.36887e-278	1.59905e-273	RS
DCAF13	-0.388755	0.691	0.831	5.71083e-276	2.09022e-271	RS
SAP30	-0.45463	0.487	0.675	7.77472e-276	2.84562e-271	RS
MYH10	-0.425523	0.43	0.626	2.68412e-275	9.82415e-271	RS
RAC1	-0.3258	0.952	0.999	3.54443e-275	1.2973e-270	RS
ENPP1	-0.416642	0.232	0.498	5.70403e-274	2.08773e-269	RS
DKC1	-0.432863	0.681	0.815	1.0529e-273	3.85371e-269	RS
CDCA3	-0.512049	0.385	0.693	4.91537e-273	1.79908e-268	RS
FCGRT	0.503092	0.762	0.463	7.28893e-273	2.66782e-268	RS
MRPS21	0.411496	0.955	0.968	1.21695e-271	4.45415e-267	RS
MRPL22	-0.400874	0.728	0.865	9.8992e-271	3.62321e-266	RS
ATP5ME	0.461624	0.962	0.987	2.41918e-270	8.85445e-266	RS
CYSTM1	0.41875	0.726	0.384	3.69322e-270	1.35175e-265	RS
DRAP1	-0.349359	0.972	1	3.7869e-270	1.38604e-265	RS
HNRNPA0	-0.425407	0.759	0.869	8.85423e-270	3.24074e-265	RS
TSPO	0.600707	0.981	0.995	3.02165e-269	1.10595e-264	RS
LMAN1	-0.427642	0.853	0.962	3.24994e-269	1.18951e-264	RS
SMURF2	0.703457	0.883	0.871	5.29884e-269	1.93943e-264	RS
SF3B1	-0.386441	0.798	0.92	1.75518e-268	6.42415e-264	RS
BAZ1A	-0.426882	0.629	0.775	4.58709e-268	1.67892e-263	RS
ZMAT3	0.527041	0.795	0.56	3.17225e-267	1.16108e-262	RS
PIMREG	-0.390071	0.27	0.534	9.5006e-267	3.47731e-262	RS
STC1	1.08933	0.8	0.573	1.45002e-265	5.30723e-261	RS
CACYBP	-0.404539	0.827	0.947	3.2426e-265	1.18682e-260	RS
SNRPA	-0.410465	0.642	0.78	1.70157e-264	6.22792e-260	RS
HTRA1	0.557262	0.835	0.669	1.79384e-264	6.56562e-260	RS
RTRAF	-0.355773	0.908	0.984	5.67044e-264	2.07544e-259	RS
PRNP	0.464915	0.808	0.573	5.70528e-263	2.08819e-258	RS
SLC16A3	0.482955	0.847	0.827	1.58334e-262	5.7952e-258	RS
SRRM2	-0.436922	0.81	0.958	1.77888e-262	6.5109e-258	RS
AREG	0.399613	0.389	0.097	1.83187e-262	6.70483e-258	RS
ARL3	-0.362292	0.804	0.898	8.09523e-262	2.96294e-257	RS
C1orf122	0.46345	0.927	0.899	1.34206e-261	4.91207e-257	RS
PBK	-0.472518	0.425	0.745	3.17825e-261	1.16327e-256	RS
SMARCC1	-0.417002	0.675	0.788	3.29703e-261	1.20674e-256	RS
PDLIM2	0.462337	0.938	0.961	8.22154e-260	3.00917e-255	RS
SLC25A6	-0.343332	0.948	0.997	1.73133e-259	6.33682e-255	RS
ATP5MF	0.408381	0.966	0.997	1.96889e-259	7.20633e-255	RS
TGFBR2	0.471709	0.799	0.592	4.57066e-259	1.67291e-254	RS
PFN2	0.429542	0.926	0.936	5.0515e-259	1.8489e-254	RS
STOM	0.584485	0.801	0.593	6.72821e-259	2.46259e-254	RS
BGN	-0.510098	0.469	0.675	2.19105e-257	8.01948e-253	RS
UBE2T	-0.492638	0.585	0.799	1.18304e-256	4.33004e-252	RS
SMPD1	0.388602	0.759	0.479	1.24271e-256	4.54844e-252	RS
CERCAM	0.377047	0.708	0.378	2.137e-256	7.82163e-252	RS
MCTS1	-0.367273	0.82	0.932	4.27569e-256	1.56494e-251	RS
CFL2	0.387942	0.951	0.962	1.05455e-255	3.85974e-251	RS
EXOSC9	-0.380837	0.42	0.642	1.08261e-255	3.96246e-251	RS
PRPF40A	-0.391172	0.804	0.929	2.96471e-255	1.08511e-250	RS
FLNC	0.566544	0.835	0.815	1.11249e-254	4.07182e-250	RS
LBR	-0.428644	0.476	0.661	3.45019e-254	1.2628e-249	RS
MAP3K20	0.548097	0.898	0.872	3.52582e-254	1.29048e-249	RS
DNAJC9	-0.428482	0.562	0.754	4.94197e-253	1.80881e-248	RS
CMSS1	-0.39376	0.572	0.739	3.08799e-252	1.13023e-247	RS
HSPB1	0.545026	0.986	0.999	3.12984e-252	1.14555e-247	RS
MIS18A	-0.402292	0.405	0.613	3.99261e-252	1.46133e-247	RS
CTSB	0.577021	0.895	0.917	9.52598e-252	3.48661e-247	RS
ITGAE	0.464574	0.925	0.927	1.64457e-251	6.01931e-247	RS
SRSF11	-0.375103	0.842	0.959	1.90816e-251	6.98405e-247	RS
PGD	-0.423631	0.746	0.848	3.00637e-251	1.10036e-246	RS
MRPL11	-0.374365	0.776	0.885	3.33975e-251	1.22238e-246	RS
SLC20A1	0.666414	0.796	0.683	1.1433e-250	4.1846e-246	RS
PNPLA2	0.334123	0.703	0.376	2.03251e-250	7.43919e-246	RS
DYNLRB1	0.445443	0.963	0.983	4.31791e-249	1.5804e-244	RS
PLCB4	0.469821	0.729	0.437	6.58913e-249	2.41169e-244	RS
CAP1	0.409245	0.947	0.994	1.00651e-248	3.68394e-244	RS
SNRPA1	-0.385794	0.753	0.887	2.31267e-248	8.46459e-244	RS
HAT1	-0.393094	0.697	0.86	4.15399e-248	1.5204e-243	RS
CTTN	0.440669	0.925	0.911	8.26205e-248	3.02399e-243	RS
MANF	-0.422097	0.803	0.918	1.70024e-246	6.22304e-242	RS
ATP6AP1	0.460445	0.811	0.623	3.75667e-246	1.37498e-241	RS
IGFBP6	0.756707	0.91	0.88	5.5693e-246	2.03842e-241	RS
SARAF	0.525747	0.845	0.697	1.20569e-245	4.41293e-241	RS
SLC3A2	-0.447612	0.644	0.784	2.09123e-245	7.6541e-241	RS
RPL26L1	-0.372074	0.834	0.935	2.39822e-245	8.77773e-241	RS
FBLN5	0.445674	0.793	0.568	3.26678e-245	1.19567e-240	RS
SPCS2	-0.381724	0.873	0.989	3.81237e-245	1.39537e-240	RS
NEDD8	0.350448	0.976	0.999	4.65334e-245	1.70317e-240	RS
LBH	0.589233	0.67	0.376	9.52232e-245	3.48526e-240	RS
RPL36	0.320508	0.995	1	1.47963e-244	5.41561e-240	RS
MYADM	0.566481	0.819	0.717	2.67293e-244	9.78318e-240	RS
SLC20A2	0.351284	0.665	0.345	7.34597e-243	2.6887e-238	RS
PSMD7	-0.377876	0.827	0.96	1.07598e-242	3.9382e-238	RS
EIF3A	-0.405277	0.884	0.988	1.30695e-242	4.78358e-238	RS
KIF20A	-0.378059	0.216	0.481	1.56269e-242	5.71959e-238	RS
SHC1	0.474095	0.871	0.826	4.07221e-242	1.49047e-237	RS
DDAH1	0.478291	0.823	0.655	5.23762e-242	1.91702e-237	RS
TNFRSF11B	0.672033	0.765	0.473	9.78901e-242	3.58288e-237	RS
ABCE1	-0.394884	0.807	0.919	2.42926e-241	8.89134e-237	RS
MRPS15	-0.351539	0.828	0.919	3.84221e-241	1.40629e-236	RS
TROAP	-0.3675	0.299	0.551	8.65865e-241	3.16915e-236	RS
SYNCRIP	-0.393482	0.849	0.964	1.65295e-240	6.04997e-236	RS
HDGF	-0.401638	0.809	0.901	4.39245e-240	1.60768e-235	RS
NUF2	-0.48962	0.334	0.59	5.73477e-240	2.09898e-235	RS
RGMB	0.700949	0.803	0.764	1.77391e-239	6.49268e-235	RS
SF3A3	-0.363529	0.644	0.764	2.8731e-239	1.05159e-234	RS
MESD	-0.361332	0.795	0.89	1.05899e-237	3.876e-233	RS
PPIH	-0.373626	0.513	0.671	1.98064e-237	7.24934e-233	RS
BAZ1B	-0.395649	0.687	0.805	4.54748e-237	1.66442e-232	RS
MBOAT7	0.413355	0.821	0.653	5.46152e-237	1.99897e-232	RS
NOL7	-0.352854	0.861	0.964	8.94881e-237	3.27535e-232	RS
CDC5L	-0.370079	0.571	0.707	1.48279e-236	5.42716e-232	RS
MCFD2	0.423449	0.901	0.924	1.72751e-236	6.32285e-232	RS
TMEM47	0.455286	0.744	0.485	2.34545e-236	8.5846e-232	RS
SRSF4	-0.374693	0.704	0.821	3.37188e-236	1.23414e-231	RS
RPLP2	0.35247	0.993	1	3.79215e-236	1.38797e-231	RS
TPR	-0.375771	0.714	0.84	1.32455e-235	4.84798e-231	RS
PLOD1	0.476064	0.833	0.723	2.2078e-235	8.08077e-231	RS
MMP24OS	0.47632	0.837	0.614	2.80593e-235	1.027e-230	RS
ZFAS1	0.452438	0.959	0.984	2.93664e-235	1.07484e-230	RS
EPRS	-0.407412	0.779	0.903	5.1863e-235	1.89824e-230	RS
DNAJB6	0.397945	0.904	0.92	2.67837e-234	9.80311e-230	RS
SNX5	-0.375333	0.686	0.796	6.34434e-234	2.32209e-229	RS
SNHG6	0.454262	0.938	0.933	1.61789e-233	5.92165e-229	RS
TXNRD1	-0.555662	0.867	0.963	1.71758e-233	6.28653e-229	RS
SRSF10	-0.364608	0.809	0.912	2.25351e-233	8.24808e-229	RS
TAF13	0.380872	0.773	0.494	3.55468e-233	1.30105e-228	RS
WNT5B	0.407987	0.755	0.528	4.83022e-233	1.76791e-228	RS
DUSP3	0.349017	0.734	0.457	7.3824e-233	2.70203e-228	RS
NIPAL3	0.381495	0.76	0.479	2.3564e-232	8.62467e-228	RS
CD151	0.507323	0.922	0.99	3.74598e-232	1.37107e-227	RS
XPO1	-0.401735	0.79	0.918	4.82531e-232	1.76611e-227	RS
EMG1	-0.370452	0.667	0.792	5.51197e-232	2.01744e-227	RS
EPAS1	0.469909	0.783	0.522	2.23528e-231	8.18136e-227	RS
RRM2	-0.445556	0.487	0.844	4.91027e-231	1.79721e-226	RS
BSG	0.514133	0.912	0.979	4.97401e-231	1.82054e-226	RS
CCND3	0.39538	0.801	0.562	1.35544e-230	4.96105e-226	RS
ADAM19	0.393135	0.657	0.345	3.43828e-230	1.25844e-225	RS
EIF3I	-0.342929	0.878	0.971	3.65112e-230	1.33635e-225	RS
TM2D1	0.402657	0.826	0.64	6.34514e-230	2.32239e-225	RS
LSM6	-0.378071	0.751	0.877	6.81655e-230	2.49493e-225	RS
YPEL5	0.338589	0.726	0.406	2.61169e-229	9.55904e-225	RS
BZW1	-0.343914	0.939	0.997	2.90967e-229	1.06497e-224	RS
PPIF	-0.407407	0.65	0.77	5.80263e-229	2.12382e-224	RS
H2AFX	-0.463144	0.666	0.829	8.02461e-229	2.93709e-224	RS
KIF2C	-0.4896	0.328	0.582	1.34482e-228	4.92219e-224	RS
FHL2	0.513169	0.852	0.843	4.0674e-228	1.48871e-223	RS
BRI3	0.346174	0.966	0.998	4.60811e-228	1.68661e-223	RS
GREM1	-0.647889	0.843	0.96	1.04683e-227	3.83151e-223	RS
LRRC17	0.586733	0.865	0.837	1.06226e-227	3.88797e-223	RS
BAX	-0.377098	0.918	0.986	1.97043e-227	7.21197e-223	RS
MAT2A	-0.330399	0.746	0.872	4.99386e-227	1.8278e-222	RS
SMCHD1	-0.380603	0.691	0.811	1.13936e-226	4.17017e-222	RS
KIF11	-0.480772	0.367	0.609	1.74647e-226	6.39227e-222	RS
AP2M1	0.36457	0.974	0.994	2.49617e-226	9.13625e-222	RS
LSM2	-0.398344	0.767	0.895	3.32102e-226	1.21553e-221	RS
TSPAN4	0.450833	0.906	0.947	1.29284e-225	4.73191e-221	RS
MGAT5	0.370745	0.711	0.43	2.18407e-225	7.99392e-221	RS
ARL6IP1	-0.77056	0.768	0.886	3.01606e-225	1.10391e-220	RS
CDCA7	-0.365297	0.197	0.44	2.99506e-224	1.09622e-219	RS
PDE5A	0.583199	0.785	0.549	3.17054e-224	1.16045e-219	RS
CENPN	-0.349371	0.455	0.67	7.09776e-224	2.59785e-219	RS
XRN2	-0.374746	0.791	0.896	9.86256e-224	3.60979e-219	RS
FTH1	-0.370973	0.996	1	2.92868e-223	1.07193e-218	RS
G3BP1	-0.407228	0.834	0.944	3.91688e-223	1.43362e-218	RS
SNX3	0.362074	0.959	0.985	6.40468e-223	2.34418e-218	RS
PCNA	-0.436095	0.64	0.82	2.65156e-222	9.70498e-218	RS
CSRP1	0.432863	0.945	0.952	6.57398e-222	2.40614e-217	RS
ZWINT	-0.415777	0.526	0.768	1.54571e-221	5.65747e-217	RS
FSTL1	0.494238	0.901	0.977	1.78883e-220	6.5473e-216	RS
IK	-0.328632	0.731	0.839	7.20512e-220	2.63714e-215	RS
MAP1LC3B	0.479592	0.932	0.878	1.12689e-219	4.12453e-215	RS
EIF4EBP1	-0.456344	0.816	0.919	3.46973e-219	1.26996e-214	RS
RRM1	-0.394824	0.666	0.846	3.6354e-219	1.33059e-214	RS
ITGA1	0.403638	0.771	0.488	4.3572e-219	1.59478e-214	RS
ANTXR1	0.441618	0.752	0.475	6.53867e-219	2.39322e-214	RS
CDH11	-0.409133	0.594	0.719	9.60136e-219	3.5142e-214	RS
EZH2	-0.335949	0.278	0.515	2.38226e-218	8.71929e-214	RS
TRA2B	-0.353459	0.733	0.853	9.59865e-218	3.5132e-213	RS
NAA38	0.417895	0.925	0.925	9.992e-218	3.65717e-213	RS
DUSP1	0.613892	0.781	0.625	1.03977e-217	3.80567e-213	RS
RHOC	0.386994	0.962	0.992	2.25263e-217	8.24487e-213	RS
ITGB3BP	-0.347479	0.477	0.71	2.37894e-217	8.70717e-213	RS
MIR222HG	-0.347478	0.446	0.652	3.15822e-217	1.15594e-212	RS
MT-ND1	-0.418408	0.841	0.967	4.20738e-217	1.53994e-212	RS
P3H2	0.428914	0.699	0.427	1.12122e-216	4.10378e-212	RS
ZNF511	-0.331352	0.667	0.772	1.1543e-216	4.22485e-212	RS
MRPL33	0.385436	0.945	0.947	3.18092e-216	1.16425e-211	RS
CENPM	-0.340845	0.419	0.684	7.05328e-216	2.58157e-211	RS
SMARCB1	-0.331509	0.567	0.692	7.33051e-216	2.68304e-211	RS
SELENOT	0.359994	0.914	0.92	2.34982e-215	8.60058e-211	RS
TRAPPC1	0.398329	0.951	0.98	3.11372e-214	1.13965e-209	RS
IGFBP4	0.548979	0.919	0.938	6.74546e-214	2.46891e-209	RS
CNN1	0.530196	0.77	0.542	1.05435e-213	3.85901e-209	RS
ANLN	-0.459088	0.524	0.82	1.65719e-213	6.06549e-209	RS
PCBD1	0.434882	0.846	0.674	1.70375e-213	6.23588e-209	RS
TMA7	0.320091	0.976	0.999	2.11603e-213	7.74489e-209	RS
EIF4A3	-0.340247	0.642	0.775	2.71536e-212	9.93847e-208	RS
[truncated: 4,167 more rows]
