# Supplementary material for: Single-cell transcriptomic analysis uncovers diverse and dynamic senescent cell populations
Source: Aging (Albany NY). 2023 Apr 19;15(8):2824–51. doi: 10.18632/aging.204666 (PMC10188353; doi:10.18632/aging.204666)
Supplement: Supplementary Table 4 [file aging-15-204666-s004.xlsx]

## Sheet: Sheet1
Supplementary Table 4. Marker genes differentially expressed in each cluster versus all other clusters in senescence models.
gene	p_val	avg_log2FC	pct.1	pct.2	p_val_adj	cluster
HIST1H4C	0	2.10703	0.836	0.371	0	0
H2AFZ	0	1.85281	0.999	0.759	0	0
PTMA	0	1.65819	0.999	0.876	0	0
PCLAF	0	1.6352	0.981	0.264	0	0
HMGB1	0	1.62917	1	0.833	0	0
HMGN2	0	1.55725	0.998	0.748	0	0
STMN1	0	1.49957	0.998	0.768	0	0
TUBA1B	0	1.47156	0.999	0.834	0	0
PTTG1	0	1.43941	0.98	0.405	0	0
DEK	0	1.39072	0.994	0.615	0	0
RRM2	0	1.38888	0.942	0.204	0	0
HMGB2	0	1.28935	0.919	0.348	0	0
ID3	0	1.2829	0.977	0.54	0	0
HNRNPAB	0	1.27646	0.991	0.638	0	0
CKS2	0	1.23448	0.972	0.552	0	0
NASP	0	1.23444	0.96	0.423	0	0
ID1	0	1.21183	0.945	0.466	0	0
H3F3B	0	1.19667	0.999	0.709	0	0
CKS1B	0	1.18155	0.984	0.504	0	0
ANLN	0	1.16482	0.913	0.224	0	0
UBE2S	0	1.15954	0.997	0.717	0	0
CCNB1	0	1.15935	0.891	0.242	0	0
TUBB4B	0	1.15478	0.997	0.704	0	0
HSP90AB1	0	1.15205	0.999	0.854	0	0
CENPF	0	1.14825	0.904	0.189	0	0
MAD2L1	0	1.14701	0.931	0.232	0	0
SMC4	0	1.14682	0.941	0.31	0	0
MARCKS	0	1.14654	0.997	0.666	0	0
TPX2	0	1.13978	0.906	0.237	0	0
PRC1	0	1.13482	0.924	0.195	0	0
HNRNPD	0	1.12683	0.982	0.587	0	0
TYMS	0	1.11914	0.948	0.391	0	0
HNRNPR	0	1.11756	0.987	0.602	0	0
CENPW	0	1.10092	0.956	0.314	0	0
TMPO	0	1.09736	0.927	0.3	0	0
SRSF7	0	1.08786	0.988	0.597	0	0
BIRC5	0	1.08533	0.945	0.221	0	0
SRSF3	0	1.08214	0.996	0.674	0	0
RANBP1	0	1.07769	0.998	0.804	0	0
TUBA1C	0	1.06783	0.998	0.737	0	0
HSPD1	0	1.06578	0.996	0.77	0	0
NCL	0	1.05784	0.995	0.793	0	0
SNRPB	0	1.05486	0.996	0.694	0	0
DNMT1	0	1.0476	0.948	0.479	0	0
HNRNPU	0	1.04636	0.989	0.67	0	0
MCM7	0	1.04366	0.892	0.259	0	0
FABP5	0	1.03422	0.905	0.463	0	0
SNRPD1	0	1.03193	0.997	0.671	0	0
TNFRSF12A	0	1.03102	0.996	0.69	0	0
HNRNPA2B1	0	1.01649	0.999	0.781	0	0
TUBB	0	1.01244	0.999	0.875	0	0
DUT	0	1.00261	0.975	0.657	0	0
PTGES3	0	0.99434	0.998	0.754	0	0
UBE2T	0	0.994064	0.886	0.307	0	0
NUCKS1	0	0.993791	0.998	0.744	0	0
H2AFV	0	0.989249	0.993	0.686	0	0
DTYMK	0	0.988591	0.984	0.599	0	0
TK1	0	0.987176	0.923	0.247	0	0
SFPQ	0	0.986227	0.979	0.603	0	0
PCNA	0	0.982247	0.907	0.458	0	0
HNRNPH1	0	0.981723	0.985	0.694	0	0
KPNB1	0	0.97326	0.989	0.673	0	0
FST	0	0.964849	0.968	0.724	0	0
RRM1	0	0.963181	0.902	0.423	0	0
PRKDC	0	0.960884	0.974	0.62	0	0
KHDRBS1	0	0.960163	0.975	0.616	0	0
HELLS	0	0.959903	0.826	0.214	0	0
SRSF2	0	0.954343	0.99	0.662	0	0
FGF5	0	0.953099	0.958	0.572	0	0
SET	0	0.952773	0.999	0.802	0	0
RAD21	0	0.951787	0.949	0.53	0	0
EIF1AX	0	0.947368	0.997	0.768	0	0
CDKN3	0	0.947213	0.891	0.228	0	0
PA2G4	0	0.946002	0.989	0.668	0	0
XRCC5	0	0.945182	0.989	0.688	0	0
CLSPN	0	0.930893	0.806	0.151	0	0
HNRNPDL	0	0.919744	0.992	0.662	0	0
ATAD2	0	0.914284	0.788	0.22	0	0
PBK	0	0.908654	0.853	0.159	0	0
GMNN	0	0.907945	0.841	0.271	0	0
KPNA2	0	0.904966	0.958	0.518	0	0
LSM5	0	0.902928	0.994	0.705	0	0
TOP2A	0	0.90104	0.862	0.193	0	0
NUSAP1	0	0.888032	0.856	0.16	0	0
RAN	0	0.87633	0.999	0.897	0	0
DLGAP5	0	0.87383	0.796	0.147	0	0
ZWINT	0	0.87179	0.857	0.237	0	0
CCT6A	0	0.867865	0.992	0.697	0	0
CCNA2	0	0.865944	0.833	0.187	0	0
SMC2	0	0.864389	0.878	0.337	0	0
FUS	0	0.863607	0.957	0.551	0	0
ANP32E	0	0.862453	0.951	0.517	0	0
CBX5	0	0.855825	0.954	0.556	0	0
EIF4A1	0	0.852639	1	0.908	0	0
ALYREF	0	0.852368	0.968	0.572	0	0
CDC20	0	0.850863	0.806	0.15	0	0
HAT1	0	0.850382	0.913	0.438	0	0
HMMR	0	0.843494	0.802	0.148	0	0
MKI67	0	0.840544	0.814	0.141	0	0
CCT5	0	0.824875	0.989	0.691	0	0
PAICS	0	0.81907	0.934	0.508	0	0
ILF2	0	0.818966	0.985	0.663	0	0
BZW1	0	0.818249	0.998	0.753	0	0
HNRNPF	0	0.815166	0.954	0.575	0	0
HSP90AA1	0	0.812945	1	0.952	0	0
CBX3	0	0.808795	0.992	0.713	0	0
MCM3	0	0.801636	0.739	0.217	0	0
H2AFX	0	0.800374	0.9	0.43	0	0
RPA3	0	0.79889	0.934	0.501	0	0
DKK1	0	0.797246	0.811	0.413	0	0
ENO1	0	0.796813	0.999	0.871	0	0
CCT2	0	0.794893	0.981	0.679	0	0
PHF19	0	0.791847	0.928	0.455	0	0
ARL6IP1	0	0.787129	0.918	0.54	0	0
HIST1H1D	0	0.786617	0.471	0.045	0	0
SNRPE	0	0.786028	0.997	0.75	0	0
H1FX	0	0.785597	0.88	0.486	0	0
CENPK	0	0.785213	0.809	0.202	0	0
DNAJC9	0	0.780937	0.831	0.312	0	0
ASPM	0	0.78055	0.783	0.157	0	0
SERBP1	0	0.778897	0.997	0.797	0	0
USP1	0	0.778146	0.775	0.288	0	0
SSRP1	0	0.776127	0.895	0.463	0	0
PPP1R14B	0	0.775926	0.999	0.871	0	0
CACYBP	0	0.774993	0.966	0.604	0	0
KIF20B	0	0.77276	0.808	0.209	0	0
YWHAH	0	0.772511	0.985	0.682	0	0
PTN	0	0.770788	0.908	0.493	0	0
DIAPH3	0	0.769164	0.83	0.306	0	0
PARP1	0	0.767941	0.883	0.467	0	0
AXL	0	0.766497	0.984	0.63	0	0
SMC3	0	0.766445	0.897	0.472	0	0
GINS2	0	0.766345	0.762	0.166	0	0
UBE2C	0	0.765536	0.816	0.192	0	0
HSPE1	0	0.765378	0.999	0.839	0	0
HNRNPC	0	0.764341	0.996	0.771	0	0
JPT1	0	0.758129	0.998	0.807	0	0
BUB3	0	0.750884	0.944	0.576	0	0
MRTO4	0	0.750448	0.895	0.452	0	0
HNRNPM	0	0.747091	0.971	0.615	0	0
HNRNPA1	0	0.74614	0.997	0.799	0	0
FOSL1	0	0.74361	0.89	0.515	0	0
G3BP1	0	0.742883	0.953	0.596	0	0
SUPT16H	0	0.742571	0.911	0.525	0	0
SSR2	0	0.734437	0.996	0.737	0	0
RBM8A	0	0.732853	0.994	0.701	0	0
DDX39A	0	0.731965	0.856	0.323	0	0
NR2F2	0	0.731617	0.943	0.58	0	0
CENPU	0	0.729347	0.748	0.157	0	0
PSMA4	0	0.726503	0.992	0.72	0	0
SNHG3	0	0.725342	0.801	0.383	0	0
EBNA1BP2	0	0.721556	0.958	0.586	0	0
NOP56	0	0.719801	0.907	0.509	0	0
SLC25A5	0	0.717629	0.99	0.755	0	0
SHCBP1	0	0.716203	0.771	0.165	0	0
EIF5	0	0.715785	0.987	0.674	0	0
ABCE1	0	0.714197	0.935	0.559	0	0
NCEH1	0	0.713687	0.849	0.439	0	0
LSM2	0	0.712822	0.932	0.541	0	0
CDCA3	0	0.708627	0.775	0.156	0	0
IER2	0	0.706871	0.834	0.445	0	0
CEP55	0	0.706201	0.767	0.16	0	0
ORC6	0	0.699524	0.736	0.205	0	0
SRRM1	0	0.699011	0.961	0.609	0	0
RPL22L1	0	0.697439	0.996	0.762	0	0
SUMO2	0	0.695142	0.999	0.868	0	0
CCT4	0	0.694768	0.989	0.717	0	0
SMC1A	0	0.693238	0.842	0.456	0	0
SLBP	0	0.693135	0.842	0.48	0	0
CENPM	0	0.690715	0.774	0.168	0	0
HSPA8	0	0.690144	0.999	0.84	0	0
EXOSC8	0	0.688542	0.841	0.356	0	0
SMS	0	0.687783	0.997	0.791	0	0
HNRNPK	0	0.687462	0.996	0.747	0	0
CCNB2	0	0.687106	0.755	0.155	0	0
UHRF1	0	0.68497	0.71	0.203	0	0
DDX21	0	0.684629	0.945	0.579	0	0
PLP2	0	0.68242	0.965	0.642	0	0
SYNCRIP	0	0.68128	0.971	0.635	0	0
EZR	0	0.679765	0.92	0.54	0	0
ILF3	0	0.6791	0.906	0.537	0	0
NCAPG	0	0.678577	0.723	0.133	0	0
PRRC2C	0	0.678147	0.978	0.634	0	0
SNRPG	0	0.677952	0.995	0.746	0	0
GGH	0	0.67724	0.877	0.403	0	0
DEPDC1	0	0.677179	0.743	0.157	0	0
CDK1	0	0.673964	0.665	0.145	0	0
XPO1	0	0.673863	0.93	0.557	0	0
PPM1G	0	0.672952	0.943	0.621	0	0
DDX46	0	0.672233	0.94	0.572	0	0
HNRNPA3	0	0.671629	0.99	0.751	0	0
HNRNPH3	0	0.671216	0.975	0.664	0	0
RAC1	0	0.669462	0.999	0.821	0	0
PLAUR	0	0.668097	0.923	0.581	0	0
ITGB3BP	0	0.666515	0.798	0.242	0	0
RBMX	0	0.665182	0.922	0.532	0	0
FOXD1	0	0.664708	0.927	0.571	0	0
C12orf75	0	0.66359	0.998	0.879	0	0
SPCS2	0	0.657511	0.99	0.692	0	0
CKAP2	0	0.657085	0.779	0.307	0	0
MCM4	0	0.655484	0.703	0.209	0	0
PSIP1	0	0.652648	0.843	0.396	0	0
TPM3	0	0.651123	0.998	0.841	0	0
UBE2E3	0	0.651082	0.989	0.726	0	0
HDAC2	0	0.650387	0.947	0.595	0	0
HAS2	0	0.64977	0.469	0.142	0	0
CDH2	0	0.64881	0.813	0.358	0	0
BCLAF1	0	0.648458	0.931	0.576	0	0
SNHG1	0	0.648455	0.841	0.4	0	0
TOMM40	0	0.647251	0.901	0.51	0	0
DKC1	0	0.646146	0.84	0.43	0	0
C1QBP	0	0.64549	0.991	0.755	0	0
HMGB3	0	0.645183	0.821	0.357	0	0
DHFR	0	0.642615	0.763	0.231	0	0
RPL39L	0	0.642543	0.804	0.316	0	0
KIF23	0	0.638245	0.723	0.211	0	0
MZT1	0	0.633024	0.91	0.51	0	0
PCBP1	0	0.632048	0.99	0.676	0	0
LSM8	0	0.629472	0.926	0.571	0	0
SACS	0	0.626934	0.843	0.484	0	0
ACTG1	0	0.624618	1	0.979	0	0
PPP1CC	0	0.623976	0.945	0.591	0	0
PRRX1	0	0.617387	0.824	0.425	0	0
HIST1H1B	0	0.616965	0.431	0.039	0	0
PNN	0	0.615836	0.879	0.486	0	0
GSPT1	0	0.615461	0.964	0.656	0	0
SIVA1	0	0.612858	0.987	0.707	0	0
FBXO5	0	0.609863	0.619	0.156	0	0
CDC6	0	0.609243	0.591	0.087	0	0
CBX1	0	0.608135	0.894	0.536	0	0
TPRKB	0	0.607586	0.884	0.491	0	0
NUDC	0	0.605285	0.982	0.696	0	0
MTDH	0	0.604314	0.99	0.659	0	0
ARGLU1	0	0.603076	0.92	0.556	0	0
LSM6	0	0.602824	0.903	0.533	0	0
MCM5	0	0.599028	0.697	0.177	0	0
HSP90B1	0	0.598844	0.998	0.772	0	0
ODC1	0	0.597962	0.95	0.612	0	0
TIMM10	0	0.597355	0.973	0.666	0	0
FEN1	0	0.597075	0.678	0.189	0	0
NUDT1	0	0.596974	0.913	0.537	0	0
MAGOHB	0	0.596274	0.908	0.53	0	0
PCBP2	0	0.593755	0.995	0.768	0	0
SRRM2	0	0.593487	0.963	0.611	0	0
MRPL12	0	0.593284	0.966	0.642	0	0
EIF4E	0	0.593168	0.958	0.621	0	0
DTL	0	0.593088	0.601	0.099	0	0
ECT2	0	0.590924	0.746	0.319	0	0
FBL	0	0.590382	0.849	0.436	0	0
LDHA	0	0.588962	1	0.875	0	0
ATP1B1	0	0.587722	0.785	0.422	0	0
RBM3	0	0.586777	0.98	0.729	0	0
RBBP7	0	0.585465	0.89	0.549	0	0
PSMC6	0	0.585418	0.946	0.596	0	0
SNRPF	0	0.583979	0.987	0.724	0	0
NTMT1	0	0.582148	0.973	0.676	0	0
PTMS	0	0.582108	0.999	0.868	0	0
ANP32B	0	0.581927	0.992	0.737	0	0
NPM1	0	0.581077	0.999	0.941	0	0
CDK4	0	0.580769	0.947	0.627	0	0
PSMA2	0	0.580654	0.995	0.833	0	0
BANF1	0	0.580606	0.996	0.809	0	0
HACD3	0	0.579941	0.901	0.545	0	0
TRA2B	0	0.579613	0.878	0.506	0	0
GTSE1	0	0.578594	0.697	0.15	0	0
EMP2	0	0.57787	0.739	0.282	0	0
LRRC59	0	0.577344	0.971	0.645	0	0
CSE1L	0	0.577155	0.822	0.443	0	0
MRPL47	0	0.576612	0.968	0.648	0	0
MDK	0	0.574456	0.932	0.664	0	0
MAGOH	0	0.574433	0.898	0.52	0	0
SRSF11	0	0.574336	0.961	0.627	0	0
SRSF10	0	0.573324	0.93	0.594	0	0
ACTL6A	0	0.570137	0.826	0.411	0	0
RACGAP1	0	0.568453	0.704	0.205	0	0
UBE2N	0	0.567915	0.98	0.692	0	0
SNRPA1	0	0.567872	0.911	0.552	0	0
TAGLN2	0	0.566688	0.998	0.817	0	0
TUBB6	0	0.566506	0.985	0.703	0	0
EXOSC9	0	0.565357	0.701	0.224	0	0
C19orf48	0	0.562515	0.713	0.285	0	0
ATP2B1	0	0.561744	0.873	0.523	0	0
UBE2I	0	0.560988	0.98	0.703	0	0
LMNB1	0	0.560899	0.635	0.114	0	0
TEX30	0	0.559638	0.757	0.34	0	0
KIF11	0	0.558733	0.674	0.157	0	0
TOP1	0	0.558399	0.965	0.651	0	0
JUN	0	0.55806	0.848	0.526	0	0
VAPA	0	0.556529	0.984	0.68	0	0
HMGN1	0	0.555597	0.999	0.851	0	0
CENPN	0	0.554904	0.734	0.217	0	0
THRAP3	0	0.554561	0.917	0.578	0	0
VCAN	0	0.554111	0.861	0.505	0	0
SERPINH1	0	0.553462	0.972	0.608	0	0
HSPH1	0	0.552447	0.913	0.579	0	0
PSMA7	0	0.551089	0.999	0.864	0	0
BAZ1A	0	0.550872	0.794	0.42	0	0
CCT3	0	0.550183	0.987	0.744	0	0
RIF1	0	0.549156	0.75	0.392	0	0
YWHAZ	0	0.548916	0.998	0.828	0	0
PSMD12	0	0.547326	0.908	0.564	0	0
HNRNPA0	0	0.54645	0.891	0.541	0	0
PSMD1	0	0.542472	0.946	0.63	0	0
CTNNAL1	0	0.542397	0.927	0.612	0	0
POLE3	0	0.542074	0.787	0.396	0	0
RAD51AP1	0	0.540868	0.638	0.13	0	0
SYPL1	0	0.539296	0.947	0.609	0	0
SMCHD1	0	0.538755	0.832	0.489	0	0
TRIM28	0	0.534885	0.92	0.594	0	0
EIF2S1	0	0.532712	0.917	0.591	0	0
NONO	0	0.531593	0.956	0.669	0	0
USP14	0	0.531243	0.942	0.633	0	0
TACC3	0	0.531237	0.684	0.166	0	0
SNRPB2	0	0.530982	0.958	0.637	0	0
CALM1	0	0.529887	0.998	0.861	0	0
CMSS1	0	0.52905	0.774	0.343	0	0
RBBP4	0	0.527833	0.821	0.483	0	0
UBA2	0	0.5275	0.854	0.529	0	0
SSR3	0	0.526289	0.997	0.824	0	0
DDX18	0	0.524616	0.893	0.538	0	0
ID2	0	0.524031	0.751	0.439	0	0
FOXM1	0	0.523718	0.667	0.158	0	0
NIFK	0	0.522796	0.898	0.546	0	0
NUF2	0	0.522292	0.651	0.129	0	0
MORF4L2	0	0.521738	0.993	0.707	0	0
MRPS34	0	0.521334	0.983	0.72	0	0
ERH	0	0.520299	0.998	0.823	0	0
MRPL3	0	0.519837	0.886	0.547	0	0
RECQL	0	0.519635	0.807	0.491	0	0
TMSB15A	0	0.519631	0.545	0.111	0	0
SNRNP40	0	0.518692	0.827	0.454	0	0
LRR1	0	0.517176	0.743	0.31	0	0
MAT2A	0	0.517155	0.888	0.525	0	0
H3F3A	0	0.51683	0.999	0.859	0	0
RFC1	0	0.516637	0.764	0.415	0	0
GTPBP4	0	0.51571	0.868	0.534	0	0
AURKA	0	0.515661	0.7	0.267	0	0
EIF3A	0	0.515414	0.99	0.735	0	0
PPIF	0	0.515355	0.804	0.461	0	0
PSMD7	0	0.515143	0.96	0.634	0	0
NUP37	0	0.513875	0.781	0.367	0	0
NCAPD2	0	0.513809	0.676	0.218	0	0
MIS18A	0	0.513548	0.679	0.213	0	0
PRR11	0	0.513098	0.661	0.181	0	0
PRPF40A	0	0.512544	0.933	0.602	0	0
AHNAK	0	0.512303	0.995	0.741	0	0
COL6A3	0	0.51108	0.992	0.691	0	0
MCM10	0	0.509496	0.541	0.065	0	0
PSMA3	0	0.509392	0.981	0.723	0	0
GPATCH4	0	0.509304	0.79	0.426	0	0
GREM1	0	0.508206	0.963	0.665	0	0
CIP2A	0	0.507557	0.645	0.155	0	0
SPDL1	0	0.507308	0.686	0.296	0	0
LIMA1	0	0.506814	0.915	0.612	0	0
RFC4	0	0.506591	0.617	0.143	0	0
APEX1	0	0.506558	0.937	0.622	0	0
PPP2CA	0	0.506287	0.9	0.563	0	0
NOP58	0	0.50581	0.778	0.393	0	0
RSL1D1	0	0.505126	0.929	0.621	0	0
YWHAB	0	0.50512	0.998	0.806	0	0
COMMD4	0	0.50291	0.926	0.626	0	0
SNRPA	0	0.502726	0.813	0.464	0	0
DHX9	0	0.502409	0.857	0.532	0	0
CENPX	0	0.50048	0.975	0.732	0	0
U2SURP	0	0.498983	0.864	0.527	0	0
SOX11	0	0.498718	0.53	0.161	0	0
MSH6	0	0.497901	0.608	0.245	0	0
GMPS	0	0.497629	0.743	0.376	0	0
LSM3	0	0.496883	0.987	0.758	0	0
SYNJ2	0	0.496088	0.782	0.434	0	0
TPM4	0	0.495058	1	0.928	0	0
PSMD11	0	0.494904	0.912	0.593	0	0
CEP170	0	0.492682	0.823	0.506	0	0
FAM107B	0	0.492079	0.836	0.525	0	0
RFC3	0	0.491833	0.603	0.134	0	0
SNX5	0	0.491441	0.834	0.514	0	0
KIF2C	0	0.490665	0.639	0.128	0	0
ACTN4	0	0.490657	0.987	0.751	0	0
SPC25	0	0.490269	0.62	0.118	0	0
NSD2	0	0.489617	0.712	0.303	0	0
FANCI	0	0.489615	0.631	0.167	0	0
TFAM	0	0.489258	0.732	0.376	0	0
CCNI	0	0.488743	0.988	0.742	0	0
SEC11A	0	0.488573	0.996	0.81	0	0
LMO4	0	0.488127	0.815	0.511	0	0
YBX1	0	0.486664	0.999	0.918	0	0
MCM6	0	0.486393	0.552	0.13	0	0
SUZ12	0	0.486208	0.759	0.425	0	0
VDAC3	0	0.485764	0.955	0.671	0	0
BRIX1	0	0.485551	0.794	0.424	0	0
ARL6IP6	0	0.485421	0.707	0.353	0	0
CISD2	0	0.485379	0.875	0.573	0	0
CLDN11	0	0.484727	0.627	0.352	0	0
NECTIN3	0	0.483862	0.896	0.564	0	0
CDT1	0	0.482381	0.566	0.105	0	0
MSN	0	0.481601	0.982	0.726	0	0
IPO5	0	0.481542	0.884	0.592	0	0
PFKP	0	0.481168	0.866	0.543	0	0
KNL1	0	0.480816	0.617	0.129	0	0
EIF3E	0	0.480699	0.989	0.784	0	0
SRSF4	0	0.479764	0.84	0.511	0	0
ZNF22	0	0.479685	0.649	0.322	0	0
PRELID1	0	0.478531	0.998	0.816	0	0
CENPH	0	0.477438	0.643	0.155	0	0
CHEK1	0	0.477015	0.672	0.259	0	0
CKLF	0	0.476918	0.87	0.592	0	0
BAZ1B	0	0.475773	0.831	0.508	0	0
TCP1	0	0.475389	0.962	0.698	0	0
UAP1	0	0.475179	0.859	0.55	0	0
PAFAH1B3	0	0.47482	0.828	0.493	0	0
KIF4A	0	0.474091	0.601	0.118	0	0
BTG3	0	0.473863	0.846	0.544	0	0
FOXP1	0	0.473826	0.878	0.556	0	0
POP7	0	0.473786	0.875	0.55	0	0
RFLNB	0	0.472818	0.828	0.476	0	0
PHB2	0	0.472178	0.955	0.672	0	0
AP1S2	0	0.47013	0.952	0.682	0	0
H2AFY	0	0.46987	0.941	0.643	0	0
SEMA3A	0	0.469266	0.807	0.48	0	0
CSRP2	0	0.469215	0.873	0.568	0	0
AURKB	0	0.468993	0.599	0.132	0	0
DDX39B	0	0.468266	0.921	0.597	0	0
YWHAE	0	0.467889	0.999	0.894	0	0
MT1E	0	0.466568	0.982	0.697	0	0
CDCA7	0	0.466549	0.489	0.087	0	0
RDX	0	0.465831	0.934	0.657	0	0
ACTR3	0	0.465831	0.991	0.748	0	0
HSPA9	0	0.46574	0.912	0.608	0	0
TRIM59	0	0.465615	0.708	0.292	0	0
DHX15	0	0.465095	0.847	0.542	0	0
NHP2	0	0.464293	0.987	0.741	0	0
MANF	0	0.463812	0.927	0.618	0	0
RBM17	0	0.4638	0.893	0.578	0	0
LBR	0	0.462304	0.669	0.301	0	0
PSMC3	0	0.461002	0.967	0.695	0	0
HNRNPUL1	0	0.460989	0.837	0.515	0	0
TFDP1	0	0.460171	0.859	0.569	0	0
ENY2	0	0.460159	0.992	0.753	0	0
HDGF	0	0.46008	0.914	0.61	0	0
PSMD14	0	0.459908	0.916	0.609	0	0
SGO2	0	0.459868	0.639	0.215	0	0
RAP1B	0	0.459817	0.977	0.701	0	0
XRCC6	0	0.459519	0.971	0.705	0	0
EMG1	0	0.459089	0.805	0.468	0	0
MRPL42	0	0.458857	0.958	0.674	0	0
TPBG	0	0.458617	0.807	0.473	0	0
CDC42	0	0.458154	0.998	0.838	0	0
KLF6	0	0.457269	0.818	0.545	0	0
RNPS1	0	0.457031	0.901	0.586	0	0
IPO7	0	0.455959	0.891	0.609	0	0
RRP7A	0	0.455876	0.833	0.494	0	0
IQGAP1	0	0.455489	0.932	0.634	0	0
BARD1	0	0.454534	0.586	0.189	0	0
SSBP1	0	0.454305	0.991	0.792	0	0
DCK	0	0.45429	0.677	0.293	0	0
ITGA2	0	0.451989	0.818	0.505	0	0
WDR76	0	0.451816	0.512	0.088	0	0
CDCA4	0	0.451036	0.608	0.216	0	0
ZBTB38	0	0.450668	0.877	0.562	0	0
TLN1	0	0.449847	0.976	0.686	0	0
UCHL5	0	0.449684	0.725	0.354	0	0
ACTR2	0	0.449558	0.982	0.714	0	0
NOL7	0	0.449514	0.971	0.683	0	0
WDR34	0	0.449425	0.696	0.31	0	0
EIF5A	0	0.449293	0.998	0.858	0	0
NIP7	0	0.448936	0.763	0.424	0	0
APCDD1L	0	0.448162	0.709	0.392	0	0
LMNB2	0	0.447774	0.723	0.37	0	0
NME1	0	0.447667	0.998	0.861	0	0
SRSF1	0	0.447354	0.866	0.549	0	0
RBM25	0	0.446914	0.907	0.575	0	0
MIR222HG	0	0.446394	0.656	0.281	0	0
TKT	0	0.445305	0.968	0.68	0	0
PRMT1	0	0.445132	0.972	0.733	0	0
EZH2	0	0.444825	0.571	0.123	0	0
RAD23A	0	0.444675	0.958	0.696	0	0
CLIC1	0	0.443515	0.999	0.884	0	0
DCTPP1	0	0.443345	0.773	0.451	0	0
TIPIN	0	0.44331	0.592	0.193	0	0
PRRX2	0	0.442873	0.755	0.461	0	0
CYCS	0	0.442095	0.99	0.791	0	0
ARPC5	0	0.442052	0.996	0.79	0	0
SF3B2	0	0.441728	0.923	0.615	0	0
CDC5L	0	0.44156	0.744	0.396	0	0
KHSRP	0	0.441459	0.798	0.497	0	0
GGCT	0	0.440697	0.72	0.383	0	0
PPP1CA	0	0.44056	0.922	0.623	0	0
ZFP91	0	0.440319	0.838	0.535	0	0
BCL2L12	0	0.440141	0.696	0.309	0	0
CENPE	0	0.439041	0.591	0.154	0	0
ZNF207	0	0.43666	0.921	0.607	0	0
MESD	0	0.435942	0.896	0.602	0	0
MSH2	0	0.435237	0.599	0.214	0	0
YY1	0	0.435045	0.919	0.597	0	0
PSMC3IP	0	0.434405	0.628	0.18	0	0
CCDC34	0	0.434078	0.694	0.292	0	0
MRPL15	0	0.433851	0.856	0.525	0	0
SRPK1	0	0.433571	0.803	0.489	0	0
STIP1	0	0.433371	0.871	0.57	0	0
MRPL22	0	0.433182	0.872	0.543	0	0
INHBA	0	0.432446	0.776	0.503	0	0
SKA2	0	0.432393	0.935	0.647	0	0
HYI	0	0.431679	0.802	0.464	0	0
EIF4A3	0	0.431577	0.807	0.464	0	0
LMAN1	0	0.431564	0.96	0.673	0	0
BRCA1	0	0.431525	0.529	0.125	0	0
MRPL13	0	0.431061	0.941	0.641	0	0
RHEB	0	0.430961	0.991	0.768	0	0
SF3A3	0	0.430533	0.791	0.469	0	0
RBBP8	0	0.430471	0.584	0.226	0	0
CREB3L2	0	0.430382	0.801	0.5	0	0
VRK1	0	0.430346	0.603	0.183	0	0
SMARCA5	0	0.430258	0.87	0.57	0	0
EIF4EBP1	0	0.429871	0.931	0.642	0	0
NOL11	0	0.429765	0.701	0.346	0	0
MYBL1	0	0.429408	0.662	0.341	0	0
SMAP2	0	0.429269	0.775	0.46	0	0
NCAPD3	0	0.428996	0.6	0.23	0	0
PSMD2	0	0.428508	0.986	0.793	0	0
PBRM1	0	0.426624	0.792	0.485	0	0
PPIG	0	0.426196	0.873	0.554	0	0
NUP62	0	0.426082	0.667	0.347	0	0
ANKRD28	0	0.425902	0.803	0.482	0	0
POLR3K	0	0.425767	0.839	0.538	0	0
AKAP12	0	0.425041	0.604	0.33	0	0
LRRFIP1	0	0.424434	0.903	0.601	0	0
PDIA6	0	0.424425	0.992	0.748	0	0
RFC2	0	0.423026	0.592	0.19	0	0
ARPC5L	0	0.423023	0.935	0.651	0	0
PLK1	0	0.4213	0.612	0.147	0	0
IER3	0	0.420721	0.802	0.528	0	0
CMC2	0	0.420663	0.863	0.563	0	0
GPX8	0	0.419642	0.99	0.752	0	0
LYAR	0	0.418687	0.722	0.4	0	0
BTF3L4	0	0.41766	0.943	0.649	0	0
PSMA1	0	0.417381	0.989	0.779	0	0
CAPRIN1	0	0.41704	0.928	0.638	0	0
HSPB11	0	0.41626	0.905	0.619	0	0
CKAP5	0	0.415519	0.778	0.484	0	0
RRS1	0	0.41466	0.711	0.387	0	0
ZC3H15	0	0.414145	0.95	0.636	0	0
CCDC137	0	0.413843	0.723	0.417	0	0
CTPS1	0	0.413627	0.708	0.385	0	0
E2F7	0	0.413336	0.609	0.25	0	0
TRIP13	0	0.41194	0.607	0.166	0	0
ZWILCH	0	0.411883	0.637	0.253	0	0
PLS3	0	0.411862	0.917	0.63	0	0
NUDT21	0	0.410999	0.787	0.482	0	0
TMA16	0	0.410578	0.728	0.394	0	0
BUB1	0	0.410076	0.558	0.115	0	0
DHX36	0	0.410011	0.827	0.512	0	0
PCOLCE	0	0.409486	0.865	0.501	0	0
MELK	0	0.409294	0.573	0.162	0	0
RPP30	0	0.408922	0.761	0.426	0	0
PDIA4	0	0.408858	0.885	0.591	0	0
TCEA1	0	0.408745	0.941	0.651	0	0
RBM39	0	0.40822	0.939	0.633	0	0
PSMG1	0	0.407844	0.796	0.47	0	0
GDI2	0	0.407212	0.962	0.705	0	0
DCUN1D5	0	0.406852	0.895	0.576	0	0
PCMT1	0	0.406843	0.936	0.643	0	0
PPIB	0	0.406779	0.998	0.855	0	0
CCT8	0	0.405838	0.977	0.735	0	0
SF3B1	0	0.405447	0.921	0.609	0	0
ERGIC2	0	0.403752	0.923	0.628	0	0
CDCA8	0	0.403283	0.599	0.144	0	0
PPIH	0	0.402834	0.709	0.37	0	0
LDHB	0	0.402345	0.998	0.888	0	0
NXT1	0	0.402161	0.675	0.354	0	0
CNOT9	0	0.401451	0.706	0.385	0	0
ANP32A	0	0.401314	0.832	0.512	0	0
HPF1	0	0.401294	0.728	0.389	0	0
RSL24D1	0	0.401273	0.957	0.661	0	0
RPL7L1	0	0.401007	0.903	0.603	0	0
RSRC2	0	0.400774	0.82	0.525	0	0
MBNL1	0	0.39946	0.911	0.623	0	0
MAZ	0	0.398384	0.806	0.491	0	0
HMGXB4	0	0.397971	0.697	0.384	0	0
SMARCC1	0	0.397425	0.799	0.504	0	0
TMX1	0	0.39741	0.807	0.526	0	0
SON	0	0.397006	0.928	0.603	0	0
NRGN	0	0.396875	0.605	0.186	0	0
ITGA6	0	0.396509	0.665	0.386	0	0
HIST1H1E	0	0.395972	0.372	0.046	0	0
PAGR1	0	0.395781	0.693	0.38	0	0
UGDH	0	0.395566	0.759	0.479	0	0
EEF1E1	0	0.395329	0.928	0.632	0	0
TOPBP1	0	0.394435	0.599	0.268	0	0
PAK1IP1	0	0.394391	0.661	0.339	0	0
UTP20	0	0.394281	0.597	0.274	0	0
XIST	0	0.393862	0.831	0.399	0	0
PYURF	0	0.393668	0.923	0.628	0	0
GOLIM4	0	0.393449	0.93	0.641	0	0
GNPNAT1	0	0.393253	0.762	0.454	0	0
MRPL11	0	0.393251	0.9	0.609	0	0
NRP1	0	0.391401	0.691	0.393	0	0
GNAI3	0	0.391381	0.915	0.614	0	0
NOLC1	0	0.391005	0.628	0.329	0	0
FAM111A	0	0.39046	0.566	0.254	0	0
HPRT1	0	0.390392	0.783	0.465	0	0
NAA50	0	0.390268	0.892	0.601	0	0
BZW2	0	0.389927	0.769	0.456	0	0
ESD	0	0.389755	0.987	0.783	0	0
UQCC3	0	0.38964	0.921	0.633	0	0
CHAF1A	0	0.389389	0.521	0.144	0	0
ARID1A	0	0.388992	0.78	0.483	0	0
WBP11	0	0.388629	0.751	0.475	0	0
MEIS2	0	0.387721	0.539	0.283	0	0
STOML2	0	0.387593	0.948	0.664	0	0
CNBP	0	0.387375	0.95	0.675	0	0
BUB1B	0	0.387091	0.544	0.113	0	0
DBF4	0	0.386817	0.605	0.21	0	0
MED21	0	0.386677	0.794	0.487	0	0
DDX3X	0	0.386603	0.923	0.623	0	0
MYBL2	0	0.385712	0.494	0.084	0	0
MMS22L	0	0.385028	0.52	0.139	0	0
MCTS1	0	0.384614	0.928	0.65	0	0
TROAP	0	0.384107	0.566	0.133	0	0
PRPF4	0	0.383909	0.653	0.347	0	0
NETO2	0	0.383754	0.536	0.184	0	0
ZNF511	0	0.383318	0.784	0.479	0	0
SRP72	0	0.382905	0.908	0.622	0	0
FANCB	0	0.382771	0.514	0.132	0	0
SRRT	0	0.382579	0.683	0.357	0	0
MCMBP	0	0.381647	0.61	0.296	0	0
DNAJA1	0	0.381243	0.976	0.721	0	0
XRN2	0	0.380919	0.913	0.621	0	0
PIMREG	0	0.38035	0.548	0.126	0	0
GPN3	0	0.379927	0.768	0.453	0	0
MARCKSL1	0	0.379509	0.918	0.636	0	0
STT3A	0	0.379469	0.787	0.5	0	0
NUP107	0	0.37942	0.589	0.22	0	0
EMP1	0	0.37924	0.804	0.497	0	0
TCERG1	0	0.379081	0.709	0.407	0	0
CD3EAP	0	0.37903	0.559	0.227	0	0
FUBP1	0	0.379017	0.712	0.414	0	0
IMMT	0	0.378944	0.789	0.506	0	0
HMGN3	0	0.378683	0.911	0.629	0	0
TCF4	0	0.378332	0.705	0.402	0	0
DDX5	0	0.3782	0.986	0.684	0	0
EIF3M	0	0.377982	0.945	0.691	0	0
GNB4	0	0.377657	0.738	0.439	0	0
CNOT7	0	0.377025	0.886	0.593	0	0
HLTF	0	0.376699	0.692	0.403	0	0
ATP1B3	0	0.37666	0.975	0.708	0	0
UBE2D3	0	0.375826	0.984	0.725	0	0
TPR	0	0.375299	0.857	0.545	0	0
ADAMTS6	0	0.37521	0.433	0.124	0	0
NAP1L4	0	0.374912	0.899	0.635	0	0
PRPF8	0	0.374678	0.848	0.565	0	0
TOMM6	0	0.374544	0.997	0.794	0	0
GANAB	0	0.374534	0.91	0.604	0	0
SAC3D1	0	0.373899	0.698	0.409	0	0
TYW3	0	0.373647	0.779	0.493	0	0
CHD4	0	0.373549	0.849	0.577	0	0
PRIM2	0	0.373423	0.652	0.33	0	0
PPP1R12A	0	0.372747	0.85	0.549	0	0
KPNA3	0	0.372221	0.861	0.586	0	0
EIF3J	0	0.371467	0.918	0.622	0	0
BRCA2	0	0.370021	0.471	0.095	0	0
SRSF6	0	0.369803	0.803	0.499	0	0
DNAJC7	0	0.369586	0.88	0.601	0	0
FJX1	0	0.368664	0.657	0.355	0	0
ARPC2	0	0.36777	0.998	0.901	0	0
AMD1	0	0.367699	0.816	0.521	0	0
PGP	0	0.367558	0.876	0.594	0	0
ARHGAP18	0	0.367115	0.676	0.401	0	0
CENPV	0	0.366481	0.661	0.367	0	0
MTAP	0	0.3662	0.657	0.363	0	0
PTBP1	0	0.365729	0.805	0.522	0	0
CCDC59	0	0.365533	0.757	0.449	0	0
DDX24	0	0.365437	0.936	0.647	0	0
CEBPZ	0	0.365252	0.73	0.44	0	0
RPA1	0	0.364863	0.64	0.361	0	0
MED31	0	0.364506	0.837	0.549	0	0
CBR1	0	0.363955	0.911	0.64	0	0
SAP30	0	0.363457	0.702	0.371	0	0
TMEM18	0	0.36291	0.721	0.441	0	0
PDAP1	0	0.362869	0.984	0.774	0	0
HDGFL3	0	0.362728	0.816	0.541	0	0
MIS18BP1	0	0.36263	0.569	0.18	0	0
PRIM1	0	0.361749	0.452	0.057	0	0
KRR1	0	0.361672	0.824	0.528	0	0
NUP54	0	0.361358	0.641	0.334	0	0
MRPL27	0	0.361176	0.945	0.655	0	0
NCAPG2	0	0.360895	0.515	0.125	0	0
SMARCA4	0	0.360383	0.79	0.518	0	0
BCL7C	0	0.360372	0.938	0.678	0	0
WAC	0	0.360365	0.786	0.507	0	0
COPB1	0	0.360097	0.944	0.632	0	0
METRNL	0	0.359919	0.73	0.47	0	0
MTHFD2	0	0.359564	0.741	0.471	0	0
LUC7L3	0	0.358966	0.881	0.572	0	0
TCOF1	0	0.357604	0.624	0.347	0	0
MCM2	0	0.357335	0.468	0.098	0	0
ELAVL1	0	0.35701	0.859	0.585	0	0
RABGGTB	0	0.356705	0.826	0.534	0	0
RPL26L1	0	0.356589	0.94	0.665	0	0
FARSB	0	0.356565	0.705	0.407	0	0
ACTB	0	0.356115	1	0.995	0	0
KIF2A	0	0.355285	0.714	0.418	0	0
POLR2B	0	0.3551	0.78	0.5	0	0
WDHD1	0	0.35509	0.491	0.113	0	0
KIF20A	0	0.354815	0.471	0.105	0	0
CTCF	0	0.353919	0.614	0.327	0	0
C1D	0	0.353628	0.883	0.588	0	0
WDR43	0	0.353346	0.793	0.496	0	0
SRP9	0	0.353268	0.996	0.836	0	0
PRKAR2A	0	0.352796	0.835	0.554	0	0
BRD4	0	0.352109	0.797	0.515	0	0
MRPS18C	0	0.351425	0.922	0.621	0	0
SMAGP	0	0.350862	0.695	0.408	0	0
PWP1	0	0.350731	0.816	0.524	0	0
GEMIN6	0	0.349593	0.708	0.425	0	0
UBE2V2	0	0.349237	0.898	0.612	0	0
IER3IP1	0	0.348092	0.965	0.724	0	0
POLD3	0	0.347884	0.487	0.14	0	0
RUVBL1	0	0.347802	0.793	0.501	0	0
MND1	0	0.347757	0.468	0.078	0	0
HNRNPL	0	0.347641	0.736	0.449	0	0
GNL3	0	0.347478	0.753	0.473	0	0
UQCRFS1	0	0.346834	0.969	0.719	0	0
EPRS	0	0.346794	0.905	0.615	0	0
TGFB1I1	0	0.346563	0.922	0.641	0	0
PKMYT1	0	0.346114	0.449	0.074	0	0
USP16	0	0.345983	0.811	0.532	0	0
DARS	0	0.34577	0.795	0.512	0	0
NDC80	0	0.344452	0.506	0.105	0	0
GTF2H3	0	0.344301	0.693	0.416	0	0
NT5C	0	0.343089	0.819	0.546	0	0
VIM	0	0.342821	1	0.996	0	0
MRPL35	0	0.34235	0.73	0.449	0	0
PSMB2	0	0.341755	0.98	0.752	0	0
COPS3	0	0.341616	0.766	0.489	0	0
LIMS1	0	0.341222	0.874	0.595	0	0
METAP2	0	0.340096	0.93	0.667	0	0
NUDCD1	0	0.339773	0.612	0.322	0	0
NAA15	0	0.339742	0.683	0.403	0	0
PSMG3	0	0.339474	0.701	0.422	0	0
PABPN1	0	0.338935	0.882	0.582	0	0
NUP155	0	0.338839	0.55	0.231	0	0
DYNC1LI1	0	0.338523	0.778	0.493	0	0
NAE1	0	0.338168	0.773	0.492	0	0
RRP36	0	0.336879	0.852	0.582	0	0
SOAT1	0	0.336554	0.676	0.429	0	0
SNRPC	0	0.33617	0.949	0.7	0	0
ACAT2	0	0.336156	0.72	0.409	0	0
CKAP2L	0	0.336024	0.495	0.115	0	0
NUP50	0	0.335453	0.663	0.398	0	0
UTP18	0	0.33529	0.63	0.336	0	0
SMARCE1	0	0.335038	0.905	0.631	0	0
TCF12	0	0.334983	0.694	0.436	0	0
SMIM15	0	0.334634	0.804	0.526	0	0
TMEM87A	0	0.3345	0.709	0.449	0	0
PKN2	0	0.333971	0.76	0.492	0	0
TMEM123	0	0.333288	0.926	0.646	0	0
NT5DC2	0	0.333114	0.894	0.633	0	0
DDX52	0	0.332746	0.733	0.459	0	0
TXNDC12	0	0.332716	0.821	0.553	0	0
CNRIP1	0	0.332132	0.703	0.426	0	0
MRPS26	0	0.332015	0.798	0.521	0	0
PDS5B	0	0.331848	0.62	0.333	0	0
RAD18	0	0.331823	0.541	0.222	0	0
TBX3	0	0.331757	0.618	0.367	0	0
SLTM	0	0.331492	0.828	0.554	0	0
VEGFC	0	0.331185	0.744	0.474	0	0
BRD7	0	0.331124	0.766	0.499	0	0
EVA1A	0	0.331072	0.72	0.439	0	0
PRPF38B	0	0.3307	0.731	0.438	0	0
RRP15	0	0.330599	0.715	0.438	0	0
HAUS1	0	0.330163	0.639	0.323	0	0
WTAP	0	0.329746	0.87	0.575	0	0
MRPL18	0	0.328683	0.906	0.618	0	0
MED6	0	0.32797	0.651	0.361	0	0
TUBG1	0	0.327903	0.755	0.482	0	0
KIF14	0	0.327802	0.497	0.119	0	0
SMNDC1	0	0.327789	0.709	0.434	0	0
CENPA	0	0.327744	0.535	0.136	0	0
FAM207A	0	0.327314	0.781	0.509	0	0
TJP2	0	0.327262	0.612	0.37	0	0
TMEM126A	0	0.326886	0.838	0.558	0	0
DAZAP1	0	0.326663	0.75	0.477	0	0
FAM111B	0	0.325964	0.334	0.022	0	0
TARS	0	0.325843	0.826	0.556	0	0
PUF60	0	0.325665	0.871	0.588	0	0
ESCO2	0	0.32525	0.426	0.07	0	0
RPA2	0	0.324908	0.639	0.356	0	0
ELP5	0	0.32463	0.909	0.651	0	0
SMARCB1	0	0.324516	0.695	0.417	0	0
NRAS	0	0.324472	0.709	0.428	0	0
UBTF	0	0.324078	0.679	0.425	0	0
PHF14	0	0.323588	0.552	0.304	0	0
PSMA6	0	0.322895	0.976	0.738	0	0
CCNE2	0	0.322244	0.328	0.028	0	0
SPHK1	0	0.322103	0.499	0.208	0	0
KDM1A	0	0.322054	0.648	0.396	0	0
DCAF13	0	0.321164	0.827	0.528	0	0
PUM3	0	0.321127	0.679	0.402	0	0
ENPP1	0	0.320779	0.458	0.186	0	0
NUP58	0	0.320281	0.633	0.373	0	0
ADRM1	0	0.319389	0.948	0.695	0	0
PRPF4B	0	0.319156	0.727	0.459	0	0
MTHFD1	0	0.319127	0.575	0.274	0	0
GART	0	0.318163	0.605	0.318	0	0
THUMPD1	0	0.317708	0.668	0.407	0	0
SF1	0	0.317507	0.868	0.582	0	0
DNAJA2	0	0.317465	0.857	0.579	0	0
UTP11	0	0.317195	0.716	0.441	0	0
RAB14	0	0.317159	0.863	0.57	0	0
AGPAT5	0	0.316702	0.506	0.191	0	0
EXOSC3	0	0.316617	0.675	0.402	0	0
DLEU2	0	0.316523	0.492	0.144	0	0
TCF19	0	0.315476	0.452	0.106	0	0
BTG1	0	0.315262	0.882	0.567	0	0
NOC3L	0	0.314668	0.654	0.383	0	0
HAUS6	0	0.314528	0.583	0.291	0	0
CHD1	0	0.314312	0.573	0.309	0	0
MRPS35	0	0.314237	0.773	0.51	0	0
CCDC12	0	0.314007	0.708	0.432	0	0
CDK2	0	0.313796	0.538	0.237	0	0
THUMPD3-AS1	0	0.313636	0.62	0.363	0	0
ATP5F1C	0	0.313504	0.974	0.729	0	0
CDCA5	0	0.313324	0.451	0.111	0	0
PSMA5	0	0.313213	0.954	0.688	0	0
KIFC1	0	0.313179	0.475	0.105	0	0
CBR3	0	0.312538	0.59	0.297	0	0
SF3B3	0	0.31247	0.691	0.448	0	0
KIAA0586	0	0.311751	0.552	0.286	0	0
CDC45	0	0.311618	0.429	0.067	0	0
PSMD6	0	0.311516	0.794	0.504	0	0
MT-ND6	0	0.311276	0.554	0.268	0	0
ADK	0	0.311258	0.767	0.502	0	0
FAM133B	0	0.310934	0.737	0.455	0	0
ZRANB2	0	0.310369	0.813	0.535	0	0
FAM192A	0	0.309333	0.723	0.462	0	0
CPSF2	0	0.309135	0.715	0.466	0	0
HS3ST3A1	0	0.308935	0.54	0.259	0	0
PARPBP	0	0.307662	0.504	0.157	0	0
UCK2	0	0.306936	0.631	0.376	0	0
CHD9	0	0.306078	0.763	0.499	0	0
TPI1	0	0.305657	0.999	0.918	0	0
RUVBL2	0	0.304971	0.721	0.439	0	0
CDC123	0	0.30419	0.845	0.56	0	0
STAG2	0	0.303649	0.686	0.439	0	0
USP10	0	0.303144	0.705	0.453	0	0
KNSTRN	0	0.30278	0.573	0.255	0	0
OBI1	0	0.302726	0.501	0.208	0	0
DNAJC8	0	0.302605	0.966	0.738	0	0
UBA6	0	0.30233	0.72	0.462	0	0
EWSR1	0	0.301652	0.797	0.526	0	0
KIF1BP	0	0.301479	0.708	0.464	0	0
GJC1	0	0.301404	0.545	0.271	0	0
SAE1	0	0.301196	0.769	0.512	0	0
AIMP1	0	0.301106	0.883	0.616	0	0
RAD51	0	0.301092	0.427	0.088	0	0
NID1	0	0.300584	0.58	0.325	0	0
SUGT1	0	0.30058	0.852	0.592	0	0
ABCF1	0	0.300331	0.853	0.585	0	0
HSPA13	0	0.299395	0.653	0.408	0	0
RNASEH1	0	0.299248	0.785	0.534	0	0
SF3B4	0	0.299157	0.753	0.491	0	0
CEP78	0	0.299016	0.509	0.218	0	0
EBP	0	0.298871	0.611	0.33	0	0
LUC7L2	0	0.298675	0.763	0.496	0	0
AK6	0	0.298429	0.797	0.53	0	0
TWISTNB	0	0.298146	0.636	0.389	0	0
NDC1	0	0.298029	0.518	0.212	0	0
DSN1	0	0.297419	0.469	0.158	0	0
RALA	0	0.296631	0.879	0.601	0	0
CFL1	0	0.296165	1	0.979	0	0
FKBP4	0	0.295974	0.741	0.496	0	0
LRRC58	0	0.295896	0.603	0.367	0	0
TTK	0	0.295723	0.482	0.114	0	0
DIAPH1	0	0.295664	0.627	0.376	0	0
TIAL1	0	0.29544	0.8	0.541	0	0
SEPTIN10	0	0.295296	0.826	0.577	0	0
COMMD2	0	0.295257	0.682	0.427	0	0
UMPS	0	0.294814	0.56	0.285	0	0
CPSF6	0	0.294445	0.665	0.415	0	0
IMP4	0	0.294321	0.801	0.545	0	0
CASP6	0	0.293965	0.542	0.269	0	0
GLOD4	0	0.2937	0.706	0.454	0	0
POGLUT3	0	0.293413	0.537	0.277	0	0
BCCIP	0	0.293321	0.677	0.437	0	0
KNOP1	0	0.293044	0.596	0.351	0	0
EXOSC6	0	0.292795	0.636	0.399	0	0
GAR1	0	0.291625	0.658	0.389	0	0
RSBN1L	0	0.290741	0.555	0.31	0	0
ATAD5	0	0.29067	0.392	0.067	0	0
FAM136A	0	0.290568	0.733	0.492	0	0
CHORDC1	0	0.290487	0.752	0.501	0	0
RPSA	0	0.289249	1	0.98	0	0
RPF2	0	0.288851	0.741	0.481	0	0
MRPL9	0	0.288276	0.718	0.476	0	0
PXMP2	0	0.288231	0.614	0.345	0	0
DDX1	0	0.288056	0.851	0.589	0	0
MNAT1	0	0.287891	0.757	0.502	0	0
SFXN1	0	0.287677	0.664	0.429	0	0
SDC1	0	0.287609	0.547	0.295	0	0
ASF1B	0	0.286803	0.412	0.072	0	0
SMC6	0	0.286754	0.527	0.271	0	0
ARHGAP11A	0	0.285899	0.522	0.157	0	0
ERVK3-1	0	0.285553	0.727	0.485	0	0
PHAX	0	0.285226	0.778	0.532	0	0
POLD2	0	0.284932	0.855	0.603	0	0
KIF22	0	0.284851	0.643	0.383	0	0
MRPL19	0	0.284634	0.767	0.515	0	0
MRPL1	0	0.284462	0.659	0.394	0	0
TMEM106C	0	0.284416	0.779	0.533	0	0
SKA3	0	0.284404	0.445	0.097	0	0
C1orf35	0	0.283138	0.628	0.391	0	0
FUT8	0	0.282556	0.56	0.314	0	0
TTF2	0	0.282127	0.5	0.209	0	0
RMI1	0	0.282031	0.44	0.156	0	0
CHCHD3	0	0.281436	0.728	0.475	0	0
CORO1C	0	0.280991	0.948	0.709	0	0
PPAT	0	0.280518	0.48	0.224	0	0
ZNF326	0	0.280312	0.65	0.373	0	0
MRPS10	0	0.279872	0.89	0.637	0	0
VMP1	0	0.279709	0.895	0.606	0	0
METAP1	0	0.279647	0.598	0.352	0	0
COA1	0	0.279331	0.791	0.546	0	0
MAD2L2	0	0.279253	0.657	0.403	0	0
POLA2	0	0.279067	0.449	0.162	0	0
POC1A	0	0.278581	0.473	0.14	0	0
EMC8	0	0.278439	0.786	0.537	0	0
NUP205	0	0.27832	0.533	0.256	0	0
IPO9	0	0.277577	0.617	0.387	0	0
CIT	0	0.277372	0.436	0.104	0	0
LIG1	0	0.277225	0.429	0.126	0	0
SPC24	0	0.2764	0.445	0.114	0	0
WEE1	0	0.27625	0.535	0.266	0	0
ADSL	0	0.275914	0.694	0.441	0	0
KHDRBS3	0	0.275808	0.498	0.247	0	0
PNO1	0	0.274491	0.661	0.417	0	0
NCAPH	0	0.273391	0.432	0.086	0	0
TMEM97	0	0.272785	0.48	0.212	0	0
SEPHS1	0	0.2726	0.609	0.361	0	0
TCF3	0	0.271261	0.607	0.368	0	0
ATIC	0	0.271112	0.676	0.42	0	0
C4orf46	0	0.270837	0.471	0.18	0	0
RNASEH2B	0	0.270441	0.53	0.263	0	0
C9orf40	0	0.270377	0.494	0.232	0	0
CDCA2	0	0.27	0.476	0.133	0	0
DONSON	0	0.269398	0.449	0.144	0	0
RBL1	0	0.269003	0.406	0.103	0	0
LTV1	0	0.268786	0.592	0.346	0	0
NAP1L1	0	0.268552	0.998	0.894	0	0
CEP57	0	0.268509	0.556	0.305	0	0
MRPS11	0	0.26796	0.844	0.593	0	0
RARS	0	0.267441	0.874	0.605	0	0
CASP2	0	0.265788	0.48	0.235	0	0
PDCL3	0	0.265739	0.697	0.439	0	0
NSL1	0	0.26546	0.698	0.463	0	0
CASP8AP2	0	0.265079	0.431	0.198	0	0
BRIP1	0	0.264934	0.387	0.086	0	0
MCUR1	0	0.264485	0.755	0.512	0	0
POLR1E	0	0.264452	0.518	0.269	0	0
HIST1H1A	0	0.263898	0.267	0.025	0	0
FH	0	0.263501	0.662	0.383	0	0
NEK2	0	0.263262	0.426	0.104	0	0
C8orf88	0	0.262504	0.498	0.224	0	0
IQGAP3	0	0.261979	0.422	0.109	0	0
PNPT1	0	0.261894	0.521	0.269	0	0
MRPS2	0	0.261733	0.661	0.427	0	0
RFWD3	0	0.261672	0.464	0.199	0	0
TIMELESS	0	0.258801	0.41	0.117	0	0
DTD1	0	0.257703	0.824	0.569	0	0
GRWD1	0	0.255359	0.543	0.303	0	0
PKIA	0	0.255318	0.478	0.223	0	0
YEATS4	0	0.253144	0.439	0.189	0	0
NOL12	0	0.252935	0.536	0.284	0	0
E2F1	0	0.252756	0.406	0.112	0	0
MRE11	0	0.252214	0.479	0.215	0	0
ID4	0	0.25139	0.271	0.07	0	0
CTDSPL2	0	0.251136	0.467	0.226	0	0
DSCC1	0	0.250437	0.371	0.076	0	0
MALAT1	0	-0.357305	0.977	0.638	0	0
GABARAP	0	-0.525336	0.994	0.91	0	0
ATP5F1E	0	-0.541907	1	0.975	0	0
PFDN5	0	-0.546845	1	0.982	0	0
QPRT	0	-0.55032	0.098	0.381	0	0
GUK1	0	-0.551891	0.998	0.929	0	0
RPS28	0	-0.552265	1	0.994	0	0
CSTB	0	-0.564177	0.997	0.951	0	0
PHPT1	0	-0.566773	0.997	0.931	0	0
BRK1	0	-0.588645	0.987	0.91	0	0
COX6B1	0	-0.596936	0.997	0.934	0	0
RPS27L	0	-0.606656	0.998	0.957	0	0
NDUFA11	0	-0.616894	0.998	0.938	0	0
NDUFA13	0	-0.631789	0.999	0.945	0	0
C4orf3	0	-0.633486	0.957	0.873	0	0
RPS19	0	-0.642414	1	0.998	0	0
TPT1	0	-0.686879	1	0.996	0	0
POLR2L	0	-0.693297	0.998	0.96	0	0
NME4	0	-0.710332	0.959	0.875	0	0
UBL5	0	-0.716986	0.999	0.948	0	0
MXD4	0	-0.726028	0.501	0.658	0	0
ATP6V0E1	0	-0.732312	0.994	0.939	0	0
ATOX1	0	-0.734733	0.982	0.902	0	0
ELOB	0	-0.735069	0.999	0.949	0	0
SNHG29	0	-0.736441	0.999	0.976	0	0
ATP6V1F	0	-0.740616	0.96	0.885	0	0
ATP5IF1	0	-0.757684	0.983	0.925	0	0
COMMD6	0	-0.758284	0.983	0.909	0	0
SELENOW	0	-0.759847	0.95	0.877	0	0
TSPO	0	-0.774972	0.994	0.954	0	0
TOMM7	0	-0.776452	0.994	0.933	0	0
MAP1LC3B	0	-0.800771	0.892	0.86	0	0
NPDC1	0	-0.817779	0.507	0.701	0	0
BEX3	0	-0.819691	0.997	0.959	0	0
C9orf16	0	-0.821902	0.868	0.832	0	0
NDUFA1	0	-0.823083	0.925	0.875	0	0
S100A6	0	-0.829245	1	0.999	0	0
HIST1H2AC	0	-0.829435	0.336	0.571	0	0
RNASEK	0	-0.859825	0.999	0.957	0	0
GABARAPL1	0	-0.86235	0.271	0.605	0	0
RABAC1	0	-0.878235	0.988	0.924	0	0
SRP14	0	-0.879528	0.999	0.981	0	0
PRDX6	0	-0.900028	0.996	0.971	0	0
MMP24OS	0	-0.904352	0.64	0.765	0	0
IFI27L2	0	-0.910393	0.852	0.855	0	0
COPZ2	0	-0.930978	0.716	0.81	0	0
FKBP1A	0	-0.93998	0.991	0.945	0	0
UCHL1	0	-0.940199	0.981	0.961	0	0
UQCR11	0	-0.940662	0.994	0.937	0	0
PRDX5	0	-0.972701	0.968	0.913	0	0
VAMP5	0	-0.986302	0.879	0.863	0	0
OST4	0	-1.00174	0.999	0.97	0	0
GLRX	0	-1.00678	0.751	0.785	0	0
CST3	0	-1.13325	0.982	0.888	0	0
GAS6	0	-1.17718	0.96	0.903	0	0
SERF2	0	-1.18219	1	0.995	0	0
SELENOM	0	-1.25032	0.957	0.938	0	0
IFITM3	0	-1.25259	0.921	0.906	0	0
IGFBP4	0	-1.3269	0.94	0.887	0	0
NUPR1	0	-1.32746	0.535	0.75	0	0
IGFBP5	0	-1.34482	0.723	0.853	0	0
FTL	0	-1.36751	1	0.999	0	0
FTH1	0	-1.56436	1	0.999	0	0
CCND1	0	-1.62893	0.995	0.969	0	0
CHTOP	2.25157e-307	0.269382	0.648	0.414	8.24099e-303	0
EPAS1	2.86089e-307	-0.925095	0.561	0.698	1.04711e-302	0
PDS5A	3.66203e-307	0.284533	0.663	0.432	1.34034e-302	0
C3orf14	4.17485e-307	0.271677	0.627	0.391	1.52804e-302	0
TMEM70	4.30713e-307	0.255387	0.654	0.42	1.57645e-302	0
PDCD10	9.90644e-307	0.276623	0.828	0.553	3.62586e-302	0
TXNDC9	2.39266e-306	0.262606	0.863	0.601	8.75739e-302	0
SDF2L1	3.4087e-306	0.346548	0.868	0.6	1.24762e-301	0
LARS	4.4626e-306	0.280941	0.792	0.539	1.63336e-301	0
SRGN	5.47718e-306	0.569575	0.426	0.177	2.0047e-301	0
TIMM8A	9.51036e-306	0.264942	0.638	0.394	3.48089e-301	0
SOCS2	1.56471e-305	0.320253	0.556	0.309	5.72698e-301	0
PAK2	1.58955e-305	0.345772	0.907	0.632	5.8179e-301	0
C11orf58	1.96597e-305	0.335509	0.987	0.757	7.19565e-301	0
G3BP2	2.02873e-305	0.323098	0.876	0.614	7.42537e-301	0
GOLT1B	2.23441e-305	0.281715	0.847	0.592	8.17816e-301	0
RBM28	2.64153e-305	0.268038	0.554	0.317	9.66825e-301	0
RNF126	3.66e-305	0.254477	0.656	0.423	1.3396e-300	0
ACIN1	1.255e-304	0.263915	0.707	0.467	4.59341e-300	0
SPIN1	3.87363e-304	0.276868	0.729	0.483	1.41779e-299	0
MOB4	4.05818e-304	0.265516	0.878	0.61	1.48533e-299	0
CCND2	1.69305e-303	-0.847692	0.028	0.28	6.19671e-299	0
UQCRQ	3.43347e-303	-0.58123	0.995	0.917	1.25669e-298	0
PDLIM5	3.69851e-303	0.340063	0.781	0.512	1.35369e-298	0
RRP1B	7.70044e-303	0.271641	0.6	0.372	2.81844e-298	0
UBE3A	1.95798e-302	0.316653	0.76	0.514	7.1664e-298	0
APPL1	2.16557e-302	0.299623	0.666	0.431	7.92621e-298	0
MORF4L1	3.87992e-302	0.370759	0.997	0.802	1.42009e-297	0
MYL9	1.21753e-301	-0.697914	0.998	0.975	4.45628e-297	0
SUB1	1.26348e-301	0.335791	0.998	0.89	4.62446e-297	0
GPBP1	2.62112e-301	0.267163	0.705	0.462	9.59356e-297	0
PPIL3	2.74798e-301	0.255752	0.633	0.397	1.00579e-296	0
MRPL50	1.85341e-300	0.26153	0.817	0.566	6.78367e-296	0
TSEN15	1.20517e-299	0.271997	0.724	0.486	4.41103e-295	0
TUBB3	2.16868e-299	0.342413	0.922	0.657	7.93758e-295	0
CCDC47	3.022e-299	0.309572	0.743	0.506	1.10608e-294	0
PSMB7	3.05201e-299	0.302554	0.986	0.782	1.11707e-294	0
CYC1	1.00706e-298	0.275593	0.917	0.672	3.68593e-294	0
DERL2	1.35184e-298	0.264117	0.82	0.566	4.94788e-294	0
PTX3	1.55911e-298	0.475624	0.579	0.312	5.70652e-294	0
TARDBP	2.44229e-298	0.268167	0.749	0.511	8.93904e-294	0
LSM7	4.52615e-298	0.355764	0.993	0.755	1.65662e-293	0
PSMC1	1.50426e-297	0.260613	0.897	0.642	5.50574e-293	0
RB1	2.13295e-297	0.300919	0.632	0.41	7.80682e-293	0
YWHAQ	2.45667e-297	0.292758	0.996	0.854	8.99167e-293	0
RAD1	4.42513e-297	0.255491	0.639	0.411	1.61964e-292	0
SRSF9	5.93526e-297	0.322478	0.993	0.809	2.17237e-292	0
CDV3	9.66142e-297	0.385521	0.97	0.701	3.53618e-292	0
TM4SF1	1.06456e-296	0.48788	0.975	0.732	3.89639e-292	0
CCN1	1.79194e-296	0.547303	0.857	0.564	6.55867e-292	0
CAP1	8.58215e-296	0.419836	0.994	0.776	3.14115e-291	0
PHIP	1.35168e-295	0.287011	0.649	0.411	4.9473e-291	0
ANAPC15	4.38514e-295	0.266024	0.87	0.621	1.605e-290	0
HMGA2	2.33247e-294	0.33833	0.852	0.553	8.53708e-290	0
SF3A1	6.07487e-294	0.272836	0.626	0.404	2.22346e-289	0
TOMM22	1.57683e-293	0.317178	0.955	0.717	5.77134e-289	0
TMSB4X	5.34926e-293	-0.628435	1	0.998	1.95788e-288	0
RAB8A	8.48022e-293	0.253792	0.789	0.557	3.10384e-288	0
IMP3	1.09371e-292	0.288707	0.825	0.548	4.00309e-288	0
CDC27	1.76005e-292	0.284211	0.756	0.513	6.44196e-288	0
NOP14	1.92096e-292	0.274805	0.578	0.346	7.03092e-288	0
CTBP1	3.64532e-292	0.285021	0.801	0.55	1.33422e-287	0
HMGA1	4.34006e-292	0.354822	0.999	0.885	1.5885e-287	0
RBM26	6.91559e-292	0.27478	0.669	0.433	2.53118e-287	0
THOC2	2.2147e-291	0.264728	0.691	0.459	8.10603e-287	0
CS	5.25875e-291	0.279479	0.682	0.456	1.92475e-286	0
RTF1	5.92695e-291	0.309253	0.884	0.599	2.16932e-286	0
TAF9	2.21797e-290	0.272945	0.923	0.677	8.11798e-286	0
PCM1	2.31704e-290	0.290864	0.73	0.484	8.48059e-286	0
MAP1LC3A	2.35592e-290	-0.666272	0.554	0.7	8.62289e-286	0
RBM7	3.34373e-290	0.269399	0.648	0.418	1.22384e-285	0
PLEKHJ1	1.09026e-289	0.259027	0.799	0.55	3.99047e-285	0
PSMC5	1.24195e-289	0.266456	0.96	0.752	4.54567e-285	0
CTBP2	1.27269e-289	0.280601	0.721	0.483	4.65818e-285	0
NDUFAF4	2.87065e-289	0.263449	0.703	0.462	1.05069e-284	0
MYH10	6.50825e-289	0.286058	0.611	0.376	2.38208e-284	0
RP9	8.16975e-289	0.270824	0.642	0.413	2.99021e-284	0
TSN	1.54363e-288	0.250145	0.736	0.507	5.64983e-284	0
GCLM	2.73603e-288	0.264988	0.808	0.54	1.00141e-283	0
JPT2	2.82213e-288	0.262641	0.615	0.391	1.03293e-283	0
MMADHC	3.68366e-288	0.298282	0.914	0.632	1.34826e-283	0
WBP4	5.50972e-288	0.285498	0.735	0.493	2.01661e-283	0
SLC25A24	5.73201e-288	0.280196	0.713	0.482	2.09797e-283	0
NUP153	1.06635e-287	0.274494	0.579	0.356	3.90293e-283	0
ZC3H18	1.07696e-287	0.267718	0.569	0.348	3.94176e-283	0
TPM1	1.33318e-287	0.406146	0.999	0.902	4.87957e-283	0
MBD4	2.59739e-287	0.25513	0.616	0.397	9.50669e-283	0
KPNA4	5.36046e-287	0.320726	0.884	0.624	1.96198e-282	0
LSM4	5.36921e-287	0.283915	0.992	0.816	1.96518e-282	0
WASF2	3.96493e-286	0.309794	0.861	0.572	1.4512e-281	0
LYRM2	5.31975e-286	0.266423	0.743	0.51	1.94708e-281	0
ARMC1	5.40626e-286	0.262731	0.719	0.488	1.97875e-281	0
ARHGDIA	8.6381e-286	0.328694	0.986	0.772	3.16163e-281	0
TMEM109	3.51335e-285	0.259144	0.647	0.426	1.28592e-280	0
RCC2	4.92348e-285	0.254698	0.514	0.288	1.80204e-280	0
RPLP0	5.61218e-285	0.251306	1	0.975	2.05412e-280	0
SAFB	7.12149e-285	0.266326	0.594	0.367	2.60654e-280	0
SMC5	9.77688e-285	0.258851	0.592	0.36	3.57844e-280	0
LZIC	2.72358e-284	0.259628	0.727	0.5	9.96858e-280	0
NBN	5.44338e-284	0.266341	0.597	0.372	1.99233e-279	0
SSB	1.83557e-283	0.292627	0.956	0.705	6.71838e-279	0
CD320	7.85261e-283	0.251569	0.83	0.582	2.87413e-278	0
LYPD1	2.49708e-282	0.358865	0.702	0.438	9.13958e-278	0
NR3C1	3.23636e-282	0.293074	0.733	0.488	1.18454e-277	0
YWHAG	1.06031e-281	0.354982	0.952	0.65	3.88084e-277	0
TSPAN5	1.79589e-281	0.308023	0.795	0.526	6.57315e-277	0
NOP16	2.31718e-281	0.265785	0.628	0.397	8.48112e-277	0
ITPA	3.26927e-281	0.255868	0.8	0.558	1.19659e-276	0
GLRX2	5.82008e-281	0.260437	0.767	0.526	2.13021e-276	0
PAPOLA	2.36711e-280	0.285939	0.923	0.66	8.66387e-276	0
CCAR1	5.79146e-280	0.26971	0.784	0.534	2.11973e-275	0
LYPLA1	8.39955e-280	0.284279	0.783	0.545	3.07432e-275	0
AASDHPPT	8.66529e-280	0.254856	0.735	0.495	3.17158e-275	0
ETS1	9.43757e-280	0.271273	0.594	0.368	3.45425e-275	0
IGF2BP3	2.16695e-279	0.309784	0.801	0.55	7.93125e-275	0
PPP2R5E	7.466e-279	0.294897	0.767	0.515	2.73263e-274	0
SNRNP200	1.97991e-278	0.265807	0.669	0.442	7.24669e-274	0
QSER1	1.66936e-277	0.250923	0.544	0.319	6.11003e-273	0
BMS1	1.41865e-276	0.256391	0.681	0.46	5.19239e-272	0
SLC25A3	4.55195e-275	0.304282	0.999	0.912	1.66606e-270	0
FXR1	1.24657e-274	0.276761	0.902	0.653	4.56258e-270	0
JKAMP	1.28435e-274	0.269226	0.876	0.606	4.70086e-270	0
KMT2A	4.51915e-274	0.28346	0.728	0.487	1.65405e-269	0
PUS7L	9.19071e-274	0.258127	0.679	0.448	3.36389e-269	0
MRPS18B	1.74901e-273	0.255919	0.745	0.503	6.40155e-269	0
ORAI3	6.71936e-273	-0.381896	0.138	0.4	2.45935e-268	0
SRI	7.96763e-273	0.308616	0.976	0.724	2.91623e-268	0
AGO2	8.05525e-273	0.283104	0.657	0.43	2.9483e-268	0
SELENOS	8.91082e-273	0.335808	0.918	0.619	3.26145e-268	0
MAGI2-AS3	1.82996e-272	0.306955	0.85	0.6	6.69783e-268	0
SMAD5	1.30459e-271	0.270935	0.808	0.55	4.77493e-267	0
KATNBL1	1.97421e-271	0.25977	0.676	0.451	7.2258e-267	0
HP1BP3	2.0126e-271	0.292494	0.911	0.636	7.36634e-267	0
AHCTF1	2.9742e-271	0.271143	0.571	0.351	1.08859e-266	0
ZC3H14	4.53373e-271	0.253374	0.624	0.408	1.65939e-266	0
COX14	2.09659e-270	-0.740799	0.76	0.76	7.67373e-266	0
COL4A2	3.43721e-270	0.372034	0.958	0.645	1.25805e-265	0
PITPNB	3.44793e-270	0.261765	0.672	0.448	1.26198e-265	0
GOT2	1.08914e-269	0.267322	0.703	0.482	3.98636e-265	0
GGNBP2	7.05133e-269	0.254773	0.737	0.51	2.58086e-264	0
ARL5A	9.6643e-269	0.252891	0.785	0.548	3.53723e-264	0
PHLDA1	2.36038e-268	0.426473	0.957	0.643	8.63921e-264	0
CYSTM1	9.99622e-268	-0.637154	0.434	0.629	3.65872e-263	0
PPP1R3C	1.876e-267	-0.773499	0.135	0.394	6.86633e-263	0
PPP4R2	2.58717e-267	0.268672	0.773	0.519	9.46928e-263	0
UBAP2L	2.59123e-267	0.274594	0.72	0.489	9.48415e-263	0
PEG10	3.87246e-267	0.290172	0.487	0.256	1.41736e-262	0
UBXN4	7.32328e-267	0.306165	0.905	0.635	2.6804e-262	0
PHF6	4.12436e-266	0.257374	0.615	0.398	1.50956e-261	0
CLTC	5.51491e-266	0.380983	0.973	0.681	2.01851e-261	0
FAM120A	5.53282e-265	0.305487	0.898	0.636	2.02507e-260	0
HSPB6	1.02318e-264	-1.05304	0.728	0.775	3.74494e-260	0
PINK1	1.02799e-264	-0.777919	0.332	0.578	3.76253e-260	0
NFIC	2.16722e-264	0.348952	0.898	0.622	7.93224e-260	0
ING2	3.60937e-264	0.254852	0.546	0.338	1.32107e-259	0
MIR100HG	4.16828e-264	0.294208	0.936	0.68	1.52563e-259	0
FAF2	5.59429e-264	0.252269	0.718	0.485	2.04757e-259	0
SPATS2L	6.64511e-264	0.361139	0.983	0.738	2.43218e-259	0
UGP2	8.6289e-264	0.267658	0.819	0.588	3.15826e-259	0
VPS35	2.59683e-263	0.290829	0.905	0.643	9.50465e-259	0
TIMP1	3.79828e-263	-1.32104	1	0.96	1.39021e-258	0
ZNF706	2.29002e-261	0.27245	0.905	0.617	8.38172e-257	0
S100A11	5.9428e-261	-0.560671	1	0.994	2.17513e-256	0
BCAP29	1.85208e-260	0.255796	0.824	0.603	6.77881e-256	0
MTCH2	7.02318e-260	0.259992	0.938	0.696	2.57055e-255	0
UBE2K	8.4249e-260	0.272913	0.85	0.598	3.0836e-255	0
SCAF11	2.03221e-259	0.264333	0.829	0.57	7.43808e-255	0
COX20	3.38689e-258	0.301476	0.969	0.731	1.23963e-253	0
NR2F1	1.52715e-257	0.30788	0.897	0.599	5.58951e-253	0
RPL37	5.50797e-257	-0.49462	0.999	0.991	2.01597e-252	0
AURKAIP1	5.00308e-256	0.293778	0.998	0.846	1.83118e-251	0
PAWR	5.85073e-256	0.279483	0.71	0.484	2.14142e-251	0
PPP2R2A	4.03341e-255	0.268599	0.739	0.509	1.47627e-250	0
SMTN	1.5384e-254	0.289555	0.743	0.503	5.63071e-250	0
ATP5MD	2.60326e-254	-0.545143	0.997	0.923	9.52819e-250	0
FOXC2	9.77687e-254	0.264726	0.441	0.227	3.57843e-249	0
UQCRB	1.52877e-253	-0.532921	0.99	0.921	5.59546e-249	0
GABARAPL2	3.43359e-253	-0.593948	0.928	0.842	1.25673e-248	0
MDFIC	6.30745e-253	0.252754	0.646	0.435	2.30859e-248	0
ANKRD11	8.77949e-253	0.306439	0.902	0.621	3.21338e-248	0
C1orf122	1.04812e-252	-0.609652	0.909	0.833	3.83624e-248	0
MFGE8	1.19292e-252	-1.04458	0.887	0.811	4.3662e-248	0
RPS27	2.52484e-252	-0.535459	1	0.99	9.24115e-248	0
MGST3	3.67833e-252	-0.554582	0.994	0.933	1.3463e-247	0
SPEN	3.7453e-251	0.259738	0.54	0.329	1.37082e-246	0
RPL28	6.27238e-251	-0.387623	1	0.998	2.29575e-246	0
SRP19	1.12995e-250	0.266109	0.944	0.663	4.13574e-246	0
KIF5B	1.94039e-250	0.275507	0.973	0.741	7.10203e-246	0
LMNA	2.30598e-249	0.309506	0.998	0.861	8.44013e-245	0
JADE1	3.25908e-249	0.25302	0.521	0.308	1.19286e-244	0
UBE2D2	3.36208e-248	0.275542	0.953	0.694	1.23056e-243	0
WDR82	8.23742e-248	0.25387	0.655	0.442	3.01498e-243	0
LARP4	8.39593e-248	0.252836	0.662	0.444	3.07299e-243	0
FBN1	4.07733e-247	0.339229	0.881	0.59	1.49234e-242	0
VCL	7.65111e-247	0.344197	0.955	0.636	2.80038e-242	0
BIRC2	2.25868e-245	0.33717	0.83	0.606	8.26698e-241	0
PDLIM1	4.98647e-244	-0.737528	0.925	0.865	1.8251e-239	0
KLF10	1.74045e-243	0.278703	0.539	0.325	6.37023e-239	0
EPS8	2.61713e-243	0.26698	0.643	0.431	9.57897e-239	0
SRM	4.46632e-243	0.294669	0.995	0.844	1.63472e-238	0
AMOTL2	5.13115e-243	0.302438	0.781	0.518	1.87805e-238	0
MCL1	1.15874e-242	0.278526	0.745	0.513	4.24109e-238	0
PLAU	1.80178e-242	0.486266	0.878	0.626	6.59471e-238	0
NRIP1	6.62284e-242	0.265125	0.57	0.357	2.42403e-237	0
ATP5MG	2.30875e-241	-0.474923	0.998	0.946	8.45024e-237	0
UBA52	3.63846e-241	-0.478124	1	0.987	1.33171e-236	0
TEAD1	6.76925e-241	0.310963	0.908	0.643	2.47761e-236	0
RIN2	1.00361e-240	0.253783	0.714	0.493	3.6733e-236	0
MRPL51	1.2875e-240	0.312878	0.998	0.834	4.71237e-236	0
RTL8C	3.65527e-239	-0.550257	0.928	0.829	1.33786e-234	0
CRIM1	1.32679e-238	0.370531	0.977	0.687	4.85618e-234	0
RRAS	1.36308e-238	-0.592553	0.883	0.817	4.98899e-234	0
FSCN1	1.69609e-238	0.271211	0.925	0.649	6.20786e-234	0
S100A13	2.71476e-237	-0.516556	0.991	0.911	9.9363e-233	0
HILPDA	5.23004e-237	0.273775	0.456	0.26	1.91425e-232	0
PUM1	2.70598e-236	0.261541	0.729	0.495	9.90415e-232	0
QKI	3.08669e-236	0.254216	0.816	0.566	1.12976e-231	0
SKIL	1.20255e-235	0.273472	0.541	0.329	4.40146e-231	0
VKORC1	1.37687e-235	-0.593581	0.978	0.875	5.03949e-231	0
ARF6	2.84266e-235	0.277851	0.886	0.6	1.04044e-230	0
IL11	8.70177e-235	0.381047	0.529	0.305	3.18493e-230	0
ROCK2	1.38568e-234	0.260051	0.819	0.57	5.07174e-230	0
ASAP1	4.90185e-234	0.290317	0.844	0.579	1.79413e-229	0
CLU	5.01097e-232	-1.12732	0.569	0.682	1.83406e-227	0
LMO7	5.60568e-232	0.29637	0.91	0.622	2.05174e-227	0
TRHDE	5.84285e-232	0.255588	0.783	0.54	2.13854e-227	0
SRGAP1	2.25515e-231	0.266095	0.749	0.517	8.25407e-227	0
UBQLN1	2.48488e-231	0.250673	0.723	0.51	9.09493e-227	0
LARP1	9.12268e-231	0.271859	0.832	0.586	3.33899e-226	0
FKBP8	1.98767e-230	-0.660238	0.823	0.815	7.27507e-226	0
RGS4	5.71784e-230	0.359195	0.441	0.223	2.09279e-225	0
CMTM6	1.54834e-229	0.263879	0.903	0.648	5.66708e-225	0
SIX1	3.64128e-229	0.267444	0.538	0.332	1.33275e-224	0
SPAG9	8.60971e-229	0.25073	0.718	0.496	3.15124e-224	0
CAST	1.53489e-228	0.301923	0.967	0.737	5.61784e-224	0
CARHSP1	2.43864e-228	0.25813	0.941	0.708	8.92568e-224	0
BNIP3L	5.4406e-228	-0.660626	0.583	0.681	1.99131e-223	0
SNRPN	6.91265e-228	-0.646342	0.626	0.718	2.5301e-223	0
OAZ1	9.56418e-228	-0.40259	1	0.982	3.50059e-223	0
CALU	2.67212e-227	0.316992	0.999	0.873	9.78024e-223	0
ALCAM	2.85965e-227	0.295434	0.944	0.648	1.04666e-222	0
TNC	3.38737e-226	0.254819	0.713	0.462	1.23981e-221	0
KRAS	4.2863e-226	0.251807	0.76	0.522	1.56883e-221	0
XBP1	3.84274e-224	0.261645	0.788	0.535	1.40648e-219	0
BPTF	7.76626e-224	0.250916	0.77	0.529	2.84253e-219	0
MRPL14	1.23758e-223	0.287674	0.972	0.705	4.52967e-219	0
TNPO1	2.10804e-223	0.264137	0.895	0.653	7.71563e-219	0
FXYD5	2.32645e-223	0.267739	0.971	0.755	8.51503e-219	0
DYNLT3	9.358e-223	-0.69839	0.672	0.757	3.42512e-218	0
QSOX1	1.37143e-222	-1.49574	0.837	0.762	5.01955e-218	0
RPL39	2.08621e-222	-0.437423	1	0.99	7.63574e-218	0
CYB5R3	1.0098e-221	-0.57586	0.951	0.853	3.69597e-217	0
SPRY2	1.19673e-221	0.254144	0.57	0.348	4.38014e-217	0
ARL4A	1.37836e-221	0.260688	0.61	0.406	5.04494e-217	0
CLIP3	1.97901e-221	-0.309838	0.165	0.403	7.24339e-217	0
IER5L	3.42109e-221	0.280399	0.624	0.409	1.25215e-216	0
HES4	3.89051e-221	0.293112	0.551	0.351	1.42397e-216	0
COX7C	6.30979e-220	-0.43221	0.996	0.926	2.30945e-215	0
SERINC2	8.68949e-220	-0.682667	0.678	0.738	3.18044e-215	0
TMEM165	1.40618e-219	0.250331	0.867	0.595	5.14676e-215	0
KLF2	1.54916e-219	0.312067	0.467	0.264	5.67007e-215	0
C4orf48	6.93987e-219	-0.620693	0.951	0.854	2.54006e-214	0
MFAP2	1.71955e-216	0.251006	0.505	0.302	6.29371e-212	0
METRN	2.56442e-216	-0.739262	0.73	0.758	9.38603e-212	0
ACTN1	2.91476e-216	0.375505	0.995	0.78	1.06683e-211	0
EIF4G2	4.00226e-215	0.339825	0.997	0.829	1.46487e-210	0
MXRA7	1.25416e-213	-0.636917	0.839	0.799	4.59036e-209	0
NEAT1	4.66619e-212	-1.11164	0.943	0.582	1.70787e-207	0
DKK3	3.14886e-211	-0.857513	0.946	0.82	1.15251e-206	0
RPL34	8.15226e-211	-0.376077	0.999	0.985	2.98381e-206	0
RPL35A	2.66153e-209	-0.378978	0.999	0.985	9.74148e-205	0
ELN	1.02309e-207	0.284054	0.267	0.096	3.74461e-203	0
RAB13	7.66554e-207	-2.05305	0.908	0.876	2.80566e-202	0
COX5B	1.30051e-204	-0.460365	0.99	0.896	4.76e-200	0
SOD1	5.67207e-204	-0.523199	0.996	0.934	2.07604e-199	0
SYNPO	2.88381e-203	-0.383164	0.084	0.298	1.0555e-198	0
NDUFB2	6.19505e-203	-0.476679	0.994	0.91	2.26745e-198	0
PERP	3.69283e-202	-0.737492	0.853	0.789	1.35161e-197	0
BGN	1.47539e-201	0.290179	0.592	0.381	5.40007e-197	0
SSR4	1.64761e-201	-0.599215	0.995	0.895	6.03042e-197	0
ZFP36L1	1.77058e-200	0.3267	0.905	0.606	6.48049e-196	0
FAM162A	3.9167e-200	-0.60661	0.439	0.601	1.43355e-195	0
TXNDC17	9.71503e-200	-0.573516	0.985	0.903	3.5558e-195	0
SOD2	5.35292e-198	-0.981649	0.698	0.749	1.95922e-193	0
PMAIP1	7.68553e-198	0.375499	0.766	0.544	2.81298e-193	0
PGPEP1	1.26973e-197	-0.323178	0.134	0.356	4.64735e-193	0
RPL41	1.27054e-197	-0.379185	1	0.998	4.65032e-193	0
SUGCT	5.44008e-197	-0.670797	0.346	0.539	1.99112e-192	0
MGAT4B	3.53267e-196	-0.618672	0.708	0.743	1.29299e-191	0
PSAP	6.23136e-196	-0.920439	0.749	0.71	2.28074e-191	0
S100A16	2.65585e-195	0.295767	0.983	0.75	9.72066e-191	0
PNRC1	2.7503e-195	-0.415116	0.221	0.439	1.00664e-190	0
AP2S1	1.34529e-194	0.259981	0.998	0.877	4.92388e-190	0
MARCH2	3.63007e-194	-0.337755	0.226	0.449	1.32864e-189	0
IL7R	1.82378e-193	0.2861	0.675	0.467	6.67522e-189	0
ATP6V1G1	3.45191e-191	-0.477311	0.973	0.861	1.26343e-186	0
LGALS3	4.44773e-191	-0.71917	0.957	0.877	1.62791e-186	0
TMEM219	1.22586e-190	-0.556244	0.753	0.749	4.48678e-186	0
NT5E	2.00846e-190	0.264856	0.95	0.691	7.35117e-186	0
RPL37A	2.33738e-190	-0.465892	1	0.99	8.55506e-186	0
NQO1	3.21211e-190	0.279008	0.977	0.798	1.17566e-185	0
DMPK	1.79775e-189	-0.314086	0.127	0.34	6.57996e-185	0
MYH9	3.06438e-189	0.330847	0.961	0.712	1.12159e-184	0
PLCG2	7.65628e-189	0.255738	0.363	0.183	2.80227e-184	0
DPP4	1.68961e-188	-0.351932	0.161	0.372	6.18413e-184	0
ADAMTS19	4.9572e-188	-0.35162	0.071	0.265	1.81438e-183	0
MRPL20	6.03425e-188	0.250511	0.99	0.778	2.2086e-183	0
HOXB-AS3	1.68516e-187	-0.631371	0.52	0.636	6.16787e-183	0
DDT	2.04866e-185	-0.537808	0.956	0.867	7.49829e-181	0
AK1	2.92628e-184	-0.562513	0.856	0.805	1.07105e-179	0
EIF4G1	3.84024e-184	0.252839	0.893	0.633	1.40557e-179	0
CDKN1A	4.08844e-184	-1.04533	0.629	0.712	1.49641e-179	0
CALR	1.55087e-182	0.258792	0.998	0.84	5.67635e-178	0
IRF2BP2	2.10288e-182	0.253547	0.618	0.438	7.69674e-178	0
GRN	2.90023e-182	-0.837694	0.695	0.689	1.06151e-177	0
ZFHX4	3.36646e-182	0.268426	0.508	0.333	1.23216e-177	0
SAT1	3.92187e-182	-0.70498	0.464	0.607	1.43544e-177	0
RPL30	4.4384e-180	-0.407265	1	0.99	1.6245e-175	0
COPS9	4.75572e-179	-0.454418	0.981	0.874	1.74064e-174	0
RPLP2	5.00276e-179	-0.391125	1	0.986	1.83106e-174	0
NDUFS5	7.81972e-179	-0.419254	0.998	0.944	2.86209e-174	0
CDC42EP5	5.07641e-178	-0.394039	0.255	0.459	1.85802e-173	0
KRTAP1-5	7.75282e-178	-0.422329	0.072	0.257	2.83761e-173	0
SERINC1	5.23234e-177	-0.838442	0.739	0.742	1.91509e-172	0
ZNHIT1	6.47483e-177	-0.499145	0.936	0.839	2.36985e-172	0
COX6A1	6.81663e-177	-0.436888	0.998	0.93	2.49495e-172	0
NDUFA3	4.20624e-176	-0.617362	0.808	0.786	1.53953e-171	0
VCP	3.01736e-175	0.256145	0.944	0.672	1.10438e-170	0
ISG15	7.20999e-175	-0.729825	0.708	0.732	2.63893e-170	0
EEF1G	7.06278e-174	-0.513107	0.999	0.963	2.58505e-169	0
LARP6	7.39269e-174	-0.578224	0.894	0.826	2.7058e-169	0
RNF7	8.38304e-174	-0.426816	0.981	0.866	3.06828e-169	0
IGFBP3	2.41855e-173	0.396204	0.678	0.457	8.85212e-169	0
PDLIM2	6.30048e-173	-0.486825	0.963	0.844	2.30604e-168	0
EPB41L3	9.64896e-173	0.269493	0.442	0.255	3.53162e-168	0
PALLD	1.05387e-172	-0.973734	0.905	0.842	3.85727e-168	0
EFEMP2	1.35153e-172	-0.577306	0.867	0.805	4.94674e-168	0
H2AFJ	1.36397e-170	-0.633456	0.844	0.799	4.99225e-166	0
CARD16	1.73165e-170	-0.529371	0.314	0.501	6.33803e-166	0
GSTP1	2.32057e-170	-0.498504	1	0.975	8.49352e-166	0
PDE5A	1.10318e-169	-0.862434	0.569	0.64	4.03774e-165	0
ISCU	1.13384e-169	-0.606816	0.835	0.77	4.14998e-165	0
ATP5PD	1.96442e-169	-0.533489	0.964	0.883	7.18996e-165	0
RRBP1	1.56751e-168	0.270995	0.956	0.666	5.73726e-164	0
HIST1H4H	2.82517e-166	-0.28469	0.126	0.321	1.03404e-161	0
MTRNR2L12	1.21258e-165	-0.927419	0.16	0.35	4.43816e-161	0
SERPINE1	3.1843e-164	0.266249	0.964	0.709	1.16549e-159	0
CYBA	5.85287e-164	-0.930052	0.74	0.751	2.14221e-159	0
EDF1	6.89842e-160	-0.367019	0.998	0.944	2.52489e-155	0
NDUFA2	1.03632e-159	-0.510776	0.908	0.817	3.79305e-155	0
C1S	4.79937e-159	-0.614598	0.284	0.462	1.75662e-154	0
GSN	1.57816e-158	-0.618524	0.716	0.73	5.77624e-154	0
HSPB1	1.62102e-158	-0.456099	0.999	0.954	5.9331e-154	0
PDCD4	4.25194e-158	-0.294197	0.186	0.386	1.55625e-153	0
ATP5ME	2.36972e-156	-0.439918	0.987	0.882	8.67341e-152	0
ARRDC4	2.48726e-156	-0.633603	0.153	0.348	9.10363e-152	0
HEBP1	6.0365e-156	-0.621879	0.68	0.697	2.20942e-151	0
TMTC1	9.50096e-155	-0.437316	0.321	0.506	3.47745e-150	0
PAPPA	3.86376e-154	-0.473153	0.19	0.376	1.41418e-149	0
CCDC80	4.09223e-154	-1.03069	0.878	0.811	1.4978e-149	0
NDUFA7	9.3809e-154	-0.526716	0.871	0.806	3.4335e-149	0
PLD3	2.75991e-152	-0.720872	0.707	0.703	1.01016e-147	0
GPX4	5.92729e-151	-0.433586	0.998	0.94	2.16945e-146	0
FCGRT	8.16893e-151	-0.565806	0.51	0.626	2.98991e-146	0
SVEP1	4.34613e-150	-0.338264	0.137	0.316	1.59073e-145	0
BASP1	5.77093e-150	0.256631	0.991	0.753	2.11222e-145	0
TRAM1	9.648e-150	-0.595194	0.929	0.816	3.53127e-145	0
POLD4	1.23942e-149	-0.492289	0.598	0.656	4.53641e-145	0
CYB5A	3.52761e-148	-0.571794	0.723	0.744	1.29114e-143	0
KIF1C	1.55915e-147	-0.826771	0.424	0.59	5.70665e-143	0
RGCC	1.84158e-146	-0.601084	0.278	0.457	6.74036e-142	0
JOSD2	3.48857e-146	-0.530026	0.785	0.747	1.27685e-141	0
MEST	8.76833e-146	-0.293608	0.133	0.318	3.2093e-141	0
RPS18	3.4658e-145	-0.371288	1	0.999	1.26852e-140	0
CD81	9.70368e-145	-0.592716	0.996	0.87	3.55165e-140	0
LTBP1	5.15891e-144	0.26423	0.968	0.672	1.88821e-139	0
CCL2	8.63434e-144	-0.894928	0.123	0.296	3.16026e-139	0
SYNGR1	1.6613e-143	-0.51616	0.545	0.641	6.08053e-139	0
UQCR10	1.75914e-142	-0.424508	0.998	0.917	6.43863e-138	0
STC1	2.87766e-142	0.280048	0.664	0.473	1.05325e-137	0
TRAPPC1	9.55298e-139	-0.398642	0.982	0.865	3.49648e-134	0
COX4I1	1.36575e-136	-0.40329	0.997	0.952	4.99876e-132	0
CD44	2.89044e-135	-0.54653	0.995	0.891	1.05793e-130	0
MRVI1	3.56283e-134	-0.28742	0.205	0.384	1.30403e-129	0
DAP	7.19433e-134	-0.525148	0.771	0.765	2.6332e-129	0
APOE	7.35931e-134	-0.632187	0.096	0.259	2.69358e-129	0
ANXA5	1.22194e-133	-0.471862	1	0.983	4.47241e-129	0
PEA15	6.63369e-132	-0.506261	0.844	0.791	2.428e-127	0
EEF1A1	1.46069e-131	-0.358995	1	0.999	5.34626e-127	0
ETFB	1.09296e-130	-0.613539	0.861	0.813	4.00036e-126	0
TXNIP	1.44118e-129	-0.649002	0.285	0.453	5.27485e-125	0
TP53I11	1.04234e-128	-0.377942	0.229	0.401	3.81505e-124	0
LRP10	2.49581e-128	-0.496152	0.65	0.661	9.1349e-124	0
TIMP2	9.53231e-128	-0.540411	0.978	0.827	3.48892e-123	0
TSLP	4.84661e-127	-0.272893	0.113	0.28	1.77391e-122	0
NDUFAF8	9.255e-126	-0.421289	0.974	0.857	3.38742e-121	0
ATP5MF	1.16334e-125	-0.382605	0.997	0.916	4.25793e-121	0
PCBD1	1.22959e-125	-0.536211	0.718	0.726	4.50043e-121	0
TMEM134	4.99217e-125	-0.363919	0.397	0.538	1.82718e-120	0
RHOQ	7.2216e-125	-0.473004	0.555	0.628	2.64318e-120	0
TP53INP2	4.37803e-124	-0.32467	0.158	0.333	1.6024e-119	0
RPS12	4.81578e-123	-0.330089	1	0.996	1.76262e-118	0
CPA4	6.39755e-122	-0.474194	0.207	0.371	2.34157e-117	0
SNX3	6.8515e-122	-0.371378	0.986	0.892	2.50772e-117	0
MFAP4	3.67292e-121	-0.399016	0.23	0.402	1.34433e-116	0
LBH	1.80378e-120	-0.638849	0.416	0.538	6.60202e-116	0
NEDD8	4.49425e-119	-0.305885	0.999	0.937	1.64494e-114	0
HAGH	5.78489e-119	-0.508908	0.53	0.639	2.11733e-114	0
TMEM159	1.84798e-116	-0.29999	0.307	0.47	6.76379e-112	0
CTTN	1.65169e-115	-0.424012	0.91	0.823	6.04535e-111	0
PAMR1	2.17864e-115	-0.42652	0.374	0.511	7.97405e-111	0
SERPINE2	7.49697e-115	-0.923984	0.72	0.71	2.74396e-110	0
EGFL7	9.29207e-115	-0.310873	0.234	0.404	3.40099e-110	0
DYNLRB1	1.76707e-114	-0.393781	0.984	0.882	6.46766e-110	0
HIST1H2BC	2.78339e-114	-0.292549	0.16	0.32	1.01875e-109	0
MGARP	3.02602e-114	-0.313093	0.233	0.401	1.10756e-109	0
SH3BGRL3	6.32387e-114	-0.370954	0.999	0.987	2.3146e-109	0
YPEL5	7.94427e-114	-0.353189	0.439	0.567	2.90768e-109	0
VAT1	1.06693e-112	-0.439553	0.544	0.623	3.90506e-108	0
ITM2C	2.62344e-112	-0.569259	0.627	0.663	9.60206e-108	0
GDF15	3.16008e-111	-0.985432	0.181	0.338	1.15662e-106	0
DNAJC4	3.42734e-111	-0.327214	0.356	0.51	1.25444e-106	0
TMEM230	4.56001e-111	-0.414573	0.904	0.813	1.66901e-106	0
NUDT14	4.08294e-110	-0.269298	0.252	0.421	1.4944e-105	0
TCEA2	5.72809e-109	-0.384026	0.395	0.526	2.09654e-104	0
TPM2	3.33829e-108	-0.568617	1	0.997	1.22185e-103	0
RIDA	1.18805e-106	-0.349036	0.301	0.457	4.34837e-102	0
DCN	1.67225e-106	-1.04551	0.898	0.802	6.12059e-102	0
CERCAM	2.57695e-106	-0.407397	0.437	0.555	9.43189e-102	0
NENF	1.06236e-105	-0.460844	0.901	0.796	3.88833e-101	0
ALDH2	5.46938e-105	-0.362118	0.258	0.417	2.00185e-100	0
ZSCAN16-AS1	1.0618e-104	-0.378313	0.406	0.542	3.88629e-100	0
NDRG1	1.99604e-104	-0.28442	0.205	0.361	7.30569e-100	0
GTF2H5	8.964e-104	-0.369016	0.958	0.835	3.28091e-99	0
SMIM27	2.58396e-103	-0.276907	0.241	0.403	9.45753e-99	0
RPS24	9.71662e-103	-0.291981	1	0.995	3.55638e-98	0
WIPI1	1.14044e-102	-0.281675	0.322	0.479	4.17411e-98	0
GAS5	1.34948e-102	-0.570741	0.935	0.843	4.93922e-98	0
PPDPF	2.12982e-102	-0.434533	0.999	0.951	7.79534e-98	0
NPC2	2.74835e-102	-0.489522	0.942	0.811	1.00592e-97	0
CYB5R1	1.95182e-100	-0.437409	0.437	0.56	7.14384e-96	0
COX6C	1.14699e-99	-0.342326	0.998	0.926	4.1981e-95	0
LAMA4	1.87382e-98	-0.442774	0.329	0.458	6.85837e-94	0
APOL2	2.60846e-98	-0.377335	0.203	0.36	9.54724e-94	0
ATP6V0C	2.56957e-97	-0.378341	0.974	0.836	9.4049e-93	0
TGFBI	3.15811e-97	-0.675853	0.852	0.774	1.1559e-92	0
OPTN	7.90743e-97	-0.524346	0.695	0.712	2.8942e-92	0
CYGB	3.0726e-96	-0.273166	0.184	0.337	1.1246e-91	0
IFI6	4.33852e-95	-0.377487	0.225	0.374	1.58794e-90	0
C18orf32	4.67322e-95	-0.406612	0.843	0.77	1.71045e-90	0
RASSF3	5.41955e-95	-0.811922	0.405	0.544	1.98361e-90	0
SARAF	1.14137e-94	-0.532491	0.728	0.695	4.17753e-90	0
CHPF	1.43138e-93	-0.433051	0.515	0.584	5.23899e-89	0
HIST1H1C	6.46501e-93	-0.851418	0.626	0.663	2.36626e-88	0
DDA1	1.39587e-92	-0.426302	0.79	0.747	5.10903e-88	0
TP53TG1	3.05795e-92	-0.351646	0.47	0.57	1.11924e-87	0
FHL1	4.50725e-91	-0.386941	0.403	0.527	1.6497e-86	0
MAPK3	8.57684e-91	-0.310189	0.358	0.497	3.13921e-86	0
COX7B	1.31461e-90	-0.353087	0.982	0.871	4.81161e-86	0
DAB2	1.3676e-90	-0.807173	0.774	0.677	5.00555e-86	0
RPL27A	1.34349e-89	-0.457495	0.999	0.975	4.91729e-85	0
STOM	4.10462e-89	-0.717436	0.633	0.634	1.50233e-84	0
EPHX1	4.36699e-89	-0.379205	0.305	0.444	1.59836e-84	0
MAP3K7CL	4.96715e-89	-0.292092	0.262	0.409	1.81803e-84	0
TMA7	1.17121e-88	-0.264234	0.999	0.929	4.28673e-84	0
RPL27	9.08969e-88	-0.252703	1	0.982	3.32692e-83	0
LTBP3	1.05982e-87	-0.255727	0.294	0.435	3.87903e-83	0
NIBAN2	2.82884e-87	-0.725525	0.74	0.73	1.03538e-82	0
CTSB	3.51674e-87	-0.588458	0.92	0.759	1.28716e-82	0
HSBP1	1.45619e-86	-0.296722	0.994	0.903	5.32978e-82	0
YIPF3	4.07675e-86	-0.442098	0.776	0.719	1.49213e-81	0
MICOS10	5.03804e-86	-0.297803	0.995	0.892	1.84397e-81	0
AK3	1.71643e-85	-0.421412	0.612	0.647	6.28232e-81	0
GDE1	2.14791e-84	-0.380466	0.527	0.609	7.86155e-80	0
SCP2	2.44002e-84	-0.43966	0.887	0.811	8.93071e-80	0
ATP6V1E1	3.06915e-84	-0.406526	0.821	0.759	1.12334e-79	0
NDUFB1	1.84e-83	-0.40885	0.938	0.83	6.73458e-79	0
IFT20	9.24572e-83	-0.389045	0.561	0.611	3.38403e-78	0
PRDX2	1.38745e-82	-0.504639	0.985	0.909	5.07821e-78	0
ZNF226	2.34053e-82	-0.263767	0.308	0.452	8.56656e-78	0
RPL26	5.9e-82	-0.295548	0.999	0.992	2.15946e-77	0
PRNP	1.25745e-81	-0.579441	0.628	0.636	4.6024e-77	0
TFPI2	1.27374e-81	-0.339133	0.81	0.615	4.662e-77	0
KISS1	2.79504e-81	0.43703	0.408	0.277	1.02301e-76	0
JCAD	4.87129e-81	-0.517858	0.518	0.594	1.78294e-76	0
LAMTOR2	8.27116e-81	-0.399661	0.834	0.756	3.02733e-76	0
RRM2B	1.52687e-80	-0.294176	0.355	0.482	5.58851e-76	0
UBE2H	1.44331e-79	-0.394237	0.539	0.583	5.28267e-75	0
LAMTOR5	2.43972e-79	-0.311041	0.981	0.846	8.92963e-75	0
PCMTD1	4.05365e-79	-0.265934	0.269	0.407	1.48368e-74	0
MICOS13	2.93157e-78	-0.328527	0.961	0.838	1.07298e-73	0
UQCRH	3.26148e-78	-0.268658	0.999	0.935	1.19373e-73	0
MMP2	4.52202e-78	-0.598135	0.809	0.701	1.6551e-73	0
RDH10	1.01266e-77	-0.261211	0.189	0.319	3.70644e-73	0
WBP1	1.19005e-77	-0.293725	0.385	0.503	4.3557e-73	0
NISCH	1.92704e-77	-0.25788	0.278	0.419	7.05316e-73	0
ANXA4	9.65178e-77	-0.430045	0.501	0.597	3.53265e-72	0
SHISA4	1.83692e-76	-0.267699	0.361	0.497	6.72331e-72	0
TPRG1L	3.78137e-76	-0.256615	0.335	0.467	1.38402e-71	0
AP2M1	9.33434e-76	-0.316409	0.993	0.913	3.41646e-71	0
HLA-E	3.15947e-75	-0.384628	0.597	0.629	1.1564e-70	0
LINC02802	9.81861e-74	-0.414081	0.852	0.766	3.59371e-69	0
ARMCX3	1.51166e-73	-0.523144	0.703	0.69	5.53284e-69	0
WFDC1	7.59833e-73	-0.323944	0.316	0.465	2.78107e-68	0
MRPS21	4.92712e-72	-0.30129	0.974	0.862	1.80338e-67	0
C19orf53	5.81122e-72	-0.260065	0.994	0.895	2.12696e-67	0
LDOC1	2.39893e-71	-0.297921	0.327	0.455	8.78033e-67	0
SURF1	8.15984e-71	-0.317605	0.449	0.55	2.98658e-66	0
CTSK	2.16717e-70	-0.430738	0.193	0.316	7.93208e-66	0
CHCHD10	3.81191e-69	-0.459712	0.73	0.716	1.3952e-64	0
LGALS3BP	9.72627e-69	-0.36877	0.376	0.482	3.55991e-64	0
MAP1B	2.19572e-68	-0.354108	0.992	0.855	8.03655e-64	0
TMEM8A	2.56283e-68	-0.280619	0.403	0.514	9.38023e-64	0
GSTM3	1.42067e-67	-0.510019	0.767	0.752	5.19978e-63	0
SAP18	6.90293e-67	-0.394763	0.99	0.904	2.52654e-62	0
CDKN2A	7.5953e-67	-0.581588	0.625	0.646	2.77996e-62	0
TNS3	1.11353e-66	-0.546662	0.474	0.56	4.07562e-62	0
CTSD	2.56674e-66	-0.548166	0.831	0.723	9.39454e-62	0
TRAK2	1.34665e-65	-0.546614	0.353	0.481	4.92886e-61	0
FIS1	1.38649e-65	-0.332133	0.936	0.815	5.0747e-61	0
TLE5	1.59222e-65	-0.309509	0.936	0.819	5.82767e-61	0
RNF141	1.02608e-64	-0.315759	0.478	0.558	3.75555e-60	0
A1BG	2.00569e-64	-0.402481	0.611	0.62	7.34103e-60	0
SNHG32	2.39858e-64	-0.431814	0.738	0.735	8.77903e-60	0
SNHG8	2.63428e-64	-0.44151	0.905	0.81	9.64172e-60	0
NOP10	5.93907e-64	-0.289573	0.995	0.888	2.17376e-59	0
SHC1	1.90452e-63	-0.381225	0.834	0.729	6.97074e-59	0
RHOC	3.80754e-63	-0.274273	0.992	0.907	1.3936e-58	0
FADS3	6.72901e-63	-0.320265	0.384	0.489	2.46289e-58	0
TMEM59	7.85079e-63	-0.664258	0.949	0.807	2.87347e-58	0
TRAPPC5	1.28957e-62	-0.279286	0.981	0.848	4.71996e-58	0
ATP5F1D	1.05467e-61	-0.271116	0.993	0.899	3.86021e-57	0
CCDC68	8.48755e-61	-0.30908	0.375	0.482	3.10653e-56	0
PRAF2	1.53544e-60	-0.285613	0.45	0.542	5.61988e-56	0
DSTN	1.5704e-60	-0.308309	0.999	0.947	5.74781e-56	0
GAMT	2.14117e-59	-0.419551	0.704	0.7	7.83691e-55	0
HLA-C	2.25463e-59	-0.54103	0.92	0.773	8.25216e-55	0
G0S2	5.26292e-59	0.900563	0.282	0.189	1.92628e-54	0
CAPNS1	2.76539e-58	-0.291247	0.962	0.832	1.01216e-53	0
IDS	4.88413e-58	-0.317602	0.489	0.57	1.78764e-53	0
NDUFA4	2.38675e-57	-0.278114	0.999	0.948	8.73575e-53	0
GNAS	4.19332e-57	-0.337052	0.999	0.942	1.5348e-52	0
VAMP3	9.43391e-57	-0.397808	0.753	0.735	3.4529e-52	0
OSTN-AS1	1.76841e-56	-0.261201	0.225	0.339	6.47255e-52	0
PSG4	1.98378e-56	-0.303419	0.366	0.473	7.26083e-52	0
ROMO1	5.24227e-56	-0.376214	0.959	0.835	1.91872e-51	0
USP53	5.03508e-55	-0.344983	0.279	0.386	1.84289e-50	0
CTSA	5.93777e-55	-0.485809	0.721	0.678	2.17328e-50	0
GNG11	1.55743e-54	-0.423395	0.972	0.88	5.70035e-50	0
SQSTM1	6.09777e-54	-0.725202	0.953	0.824	2.23184e-49	0
NBDY	8.9808e-54	-0.347613	0.829	0.747	3.28706e-49	0
GDF11	1.38042e-53	-0.328516	0.264	0.389	5.05247e-49	0
PLAT	2.04217e-53	-0.525493	0.379	0.481	7.47455e-49	0
CCPG1	4.65445e-53	-0.271496	0.359	0.469	1.70358e-48	0
RPL18A	5.58697e-53	-0.256519	1	0.996	2.04489e-48	0
RPL31	6.19168e-52	-0.331865	0.988	0.894	2.26622e-47	0
AKR1B1	8.46623e-52	-0.615887	0.869	0.794	3.09873e-47	0
MPV17	8.98499e-52	-0.377983	0.713	0.702	3.2886e-47	0
LY6E	1.20723e-51	-0.405232	0.887	0.778	4.41858e-47	0
PNPLA2	4.63732e-51	-0.291749	0.457	0.535	1.6973e-46	0
PAM	1.84211e-50	-0.36671	0.552	0.573	6.74232e-46	0
ABLIM3	2.13845e-50	-0.440577	0.389	0.497	7.82694e-46	0
DPP7	2.2222e-50	-0.398811	0.617	0.643	8.13349e-46	0
MAN1B1	2.54731e-49	-0.278686	0.413	0.502	9.32341e-45	0
PLTP	4.04391e-49	-0.262364	0.193	0.299	1.48011e-44	0
BSCL2	5.55624e-49	-0.296176	0.464	0.553	2.03364e-44	0
ZMAT3	6.63946e-49	-0.344844	0.587	0.598	2.43011e-44	0
PKIG	1.44133e-48	-0.260408	0.423	0.512	5.27541e-44	0
MPC2	1.90077e-48	-0.374366	0.936	0.807	6.95701e-44	0
TMED3	3.14283e-48	-0.403821	0.798	0.722	1.15031e-43	0
CLTB	6.19974e-47	-0.316253	0.952	0.832	2.26917e-42	0
NME3	7.38136e-47	-0.33117	0.685	0.652	2.70165e-42	0
FAM210B	8.33864e-47	-0.302396	0.524	0.568	3.05203e-42	0
COMT	1.80226e-46	-0.41016	0.895	0.777	6.59647e-42	0
TMEM258	3.03234e-46	-0.302834	0.981	0.851	1.10987e-41	0
RNF181	3.25957e-46	-0.301381	0.928	0.801	1.19304e-41	0
IGFBP7	9.85384e-46	-0.833636	0.989	0.9	3.6066e-41	0
NDUFC1	1.88386e-45	-0.304949	0.949	0.812	6.8951e-41	0
TMEM256	2.5186e-45	-0.357222	0.785	0.718	9.21834e-41	0
THY1	8.11389e-45	-0.479097	0.955	0.816	2.96977e-40	0
ANAPC16	1.08624e-44	-0.319566	0.801	0.725	3.97574e-40	0
CDIPT	5.65916e-44	-0.268878	0.499	0.562	2.07131e-39	0
BSG	9.65484e-44	-0.430701	0.983	0.814	3.53377e-39	0
DPM3	1.22409e-43	-0.345249	0.583	0.592	4.48029e-39	0
NAA38	6.59679e-43	-0.344738	0.935	0.802	2.41449e-38	0
HIGD2A	1.03398e-42	-0.308227	0.889	0.784	3.78448e-38	0
ZNF106	3.59553e-42	-0.684638	0.757	0.703	1.316e-37	0
MYL12B	1.0168e-41	-0.363675	0.999	0.965	3.72158e-37	0
SMPD1	3.81807e-41	-0.316184	0.543	0.566	1.39745e-36	0
SMIM14	1.20321e-40	-0.261079	0.5	0.557	4.40385e-36	0
MRPL33	1.87733e-40	-0.30305	0.952	0.838	6.8712e-36	0
C1R	7.05435e-40	-0.371559	0.271	0.357	2.58196e-35	0
LAMP1	1.91308e-39	-0.445257	0.804	0.694	7.00206e-35	0
PALM2-AKAP2	3.1719e-39	-0.73389	0.917	0.796	1.16095e-34	0
ZCCHC24	1.05261e-38	-0.263592	0.379	0.471	3.85264e-34	0
CD59	1.15126e-38	-0.357405	0.999	0.892	4.21374e-34	0
UBB	1.27683e-38	-0.310262	0.999	0.96	4.67332e-34	0
TMEM205	2.82921e-38	-0.28106	0.481	0.536	1.03552e-33	0
NBL1	3.18084e-38	-0.263469	0.401	0.489	1.16422e-33	0
CHP1	4.64511e-38	-0.273189	0.531	0.586	1.70016e-33	0
ETHE1	1.40668e-37	-0.335547	0.794	0.739	5.1486e-33	0
MEG3	1.78906e-37	-1.16989	0.843	0.601	6.54813e-33	0
EHD2	4.78531e-37	-0.350772	0.748	0.659	1.75147e-32	0
MYL12A	5.25029e-37	-0.365426	0.999	0.96	1.92166e-32	0
NNMT	6.47878e-37	-0.437001	0.425	0.489	2.3713e-32	0
STC2	7.54072e-36	-0.452725	0.507	0.528	2.75998e-31	0
GSTK1	6.15455e-35	-0.310486	0.573	0.612	2.25263e-30	0
SHISA5	6.186e-35	-0.28991	0.686	0.65	2.26414e-30	0
ECH1	2.67587e-34	-0.262008	0.376	0.462	9.79394e-30	0
REEP5	3.36921e-34	-0.434978	0.945	0.785	1.23316e-29	0
RPL21	4.39802e-34	-0.262402	1	0.985	1.60972e-29	0
GAL	4.52582e-34	-0.314264	0.221	0.307	1.6565e-29	0
NORAD	6.18686e-34	-0.364202	0.67	0.626	2.26445e-29	0
MSRB2	9.04043e-34	-0.298295	0.731	0.682	3.30889e-29	0
ANTXR1	1.21698e-33	-0.302328	0.524	0.559	4.45428e-29	0
NUCB1	9.38401e-33	-0.331226	0.589	0.601	3.43464e-28	0
TNFRSF11B	1.02157e-32	-0.512563	0.536	0.566	3.73906e-28	0
RAI14	1.31648e-32	-0.492922	0.876	0.763	4.81846e-28	0
CAV2	2.16259e-32	-0.277196	0.947	0.829	7.9153e-28	0
PITX1	2.81247e-32	-0.295802	0.385	0.458	1.02939e-27	0
ITGB5	5.6832e-32	-0.317262	0.544	0.569	2.08011e-27	0
REXO2	7.03901e-32	-0.261442	0.985	0.873	2.57635e-27	0
HEG1	9.16285e-32	-0.297462	0.391	0.451	3.3537e-27	0
MIEN1	1.47454e-31	-0.296151	0.817	0.725	5.39695e-27	0
MVP	1.7878e-31	-0.348322	0.601	0.612	6.54354e-27	0
TGM2	3.22421e-31	-0.349305	0.485	0.534	1.18009e-26	0
HSBP1L1	3.36111e-31	-0.261885	0.531	0.581	1.2302e-26	0
DYNC1LI2	2.08827e-30	-0.746186	0.785	0.747	7.64329e-26	0
TNFRSF10D	2.57825e-30	-0.354222	0.51	0.53	9.43666e-26	0
CHCHD7	3.16585e-30	-0.370645	0.529	0.581	1.15873e-25	0
RAMP1	4.94905e-30	-0.325785	0.516	0.552	1.8114e-25	0
PLXNB2	5.17099e-30	-0.319653	0.524	0.534	1.89263e-25	0
DCTN1	6.34668e-30	-0.460797	0.689	0.659	2.32295e-25	0
KRTAP2-3	1.4545e-29	-0.316482	0.245	0.322	5.32361e-25	0
VAMP2	6.03645e-29	-0.298433	0.678	0.638	2.2094e-24	0
ZFAS1	6.21117e-29	-0.270603	0.986	0.87	2.27335e-24	0
CD63	6.36605e-29	-0.494615	1	0.941	2.33004e-24	0
NDUFB4	1.14645e-28	-0.255596	0.974	0.843	4.19611e-24	0
PCYOX1	2.74674e-28	-0.347406	0.634	0.596	1.00533e-23	0
IGFBP6	3.41775e-28	-0.534319	0.884	0.776	1.25093e-23	0
FGF7	5.29087e-28	-0.501703	0.626	0.598	1.93651e-23	0
NXN	1.30649e-27	-0.283298	0.449	0.491	4.7819e-23	0
NGRN	1.50462e-27	-0.304314	0.821	0.742	5.50705e-23	0
GALNT5	2.17133e-27	-0.464191	0.621	0.614	7.94729e-23	0
CYBRD1	3.2699e-27	-0.267519	0.476	0.514	1.19682e-22	0
SH3PXD2A	4.11803e-27	-0.464641	0.533	0.576	1.50724e-22	0
NCSTN	4.20915e-27	-0.268945	0.523	0.547	1.54059e-22	0
CHID1	1.59071e-26	-0.357766	0.648	0.631	5.82216e-22	0
TMEM158	4.5972e-26	-0.387619	0.859	0.782	1.68262e-21	0
F3	9.98107e-26	-0.67296	0.557	0.56	3.65317e-21	0
SEC22B	1.7898e-25	-0.304761	0.878	0.783	6.55084e-21	0
CYTOR	6.52715e-25	-0.323602	0.975	0.833	2.389e-20	0
SERINC3	1.06228e-24	-0.341459	0.779	0.706	3.88805e-20	0
ASAH1	1.30764e-24	-0.309033	0.608	0.613	4.78608e-20	0
PRSS23	1.43699e-24	-0.47529	0.907	0.756	5.25953e-20	0
OS9	1.53552e-24	-0.287057	0.58	0.592	5.62015e-20	0
TMEM179B	1.57114e-24	-0.32307	0.731	0.655	5.75053e-20	0
HIPK2	1.89704e-24	-0.587125	0.791	0.712	6.94337e-20	0
VEGFB	5.61976e-23	-0.304664	0.677	0.658	2.05689e-18	0
AC010642.2	6.7216e-23	-0.281954	0.625	0.611	2.46017e-18	0
AP1S1	1.70071e-22	-0.312446	0.915	0.784	6.22476e-18	0
SGIP1	4.89341e-22	-0.434056	0.498	0.534	1.79104e-17	0
POLR3GL	1.81958e-21	-0.273397	0.557	0.584	6.65986e-17	0
CCNG1	2.33658e-21	-0.289012	0.651	0.63	8.55213e-17	0
FAM177A1	6.842e-21	-0.254142	0.863	0.76	2.50424e-16	0
CHMP2A	7.15328e-21	-0.306229	0.846	0.751	2.61817e-16	0
ITM2B	2.22832e-20	-0.517001	0.961	0.789	8.15588e-16	0
FILIP1L	5.26429e-20	-0.406666	0.562	0.539	1.92678e-15	0
CAPN2	5.32976e-20	-0.254553	0.924	0.793	1.95074e-15	0
MT-ND5	6.3772e-20	-0.292328	0.817	0.641	2.33412e-15	0
YIF1A	8.27639e-20	-0.276012	0.872	0.725	3.02924e-15	0
DDR2	9.25057e-20	-0.672796	0.785	0.716	3.3858e-15	0
KLHL5	1.27725e-19	-0.283077	0.53	0.564	4.67488e-15	0
GRINA	2.40433e-19	-0.260484	0.652	0.59	8.80007e-15	0
SLC25A39	1.06285e-18	-0.263988	0.676	0.66	3.89013e-14	0
COPE	1.73758e-18	-0.301749	0.982	0.881	6.35972e-14	0
TMEM47	2.94862e-18	-0.35226	0.54	0.543	1.07923e-13	0
LRP1	8.83475e-18	-0.366783	0.776	0.623	3.23361e-13	0
MYLK	1.29056e-17	-0.286897	0.923	0.781	4.72357e-13	0
SDHC	3.1611e-17	-0.29271	0.853	0.763	1.15699e-12	0
HEXA	4.15076e-17	-0.313887	0.51	0.537	1.51922e-12	0
MAP1A	4.98674e-17	-0.316956	0.818	0.694	1.82519e-12	0
MPG	7.25414e-17	-0.265092	0.818	0.716	2.65509e-12	0
TTC3	1.6855e-16	-0.295998	0.922	0.773	6.1691e-12	0
ATP6AP2	1.88365e-16	-0.466265	0.812	0.695	6.89436e-12	0
PRDX4	2.43438e-16	-0.261144	0.977	0.78	8.91007e-12	0
B2M	8.86336e-16	-0.363425	0.999	0.937	3.24408e-11	0
FKBP10	1.20832e-15	-0.312768	0.755	0.678	4.42257e-11	0
SH3BGRL	1.21681e-15	-0.385645	0.853	0.772	4.45365e-11	0
NDUFV3	1.36591e-15	-0.298095	0.755	0.689	4.99936e-11	0
GOLGB1	1.51511e-15	-0.316058	0.517	0.538	5.54544e-11	0
PHLDA2	1.58652e-15	-0.295955	0.995	0.908	5.8068e-11	0
CCNL2	5.03152e-15	-0.315854	0.455	0.51	1.84158e-10	0
SVIL	5.20489e-15	-0.353768	0.531	0.534	1.90504e-10	0
BCAP31	8.104e-15	-0.307561	0.921	0.764	2.96615e-10	0
PVR	1.14756e-14	-0.260995	0.385	0.424	4.20017e-10	0
MT-CO3	3.33325e-14	-0.299892	0.995	0.926	1.22e-09	0
LOX	5.05765e-14	-0.451486	0.739	0.663	1.85115e-09	0
ACOT13	1.38611e-13	-0.273148	0.529	0.547	5.0733e-09	0
EFEMP1	2.50327e-13	-0.377025	0.678	0.618	9.16222e-09	0
SIL1	3.15579e-13	-0.257161	0.519	0.537	1.15505e-08	0
LRPAP1	4.04978e-13	-0.475875	0.844	0.713	1.48226e-08	0
SEC62	7.77703e-13	-0.257247	0.918	0.754	2.84647e-08	0
TXN	2.06307e-12	-0.25638	1	0.983	7.55104e-08	0
MGAT5	1.9368e-11	-0.258798	0.499	0.492	7.0889e-07	0
MT-CO1	4.29584e-11	-0.290553	0.998	0.951	1.57232e-06	0
SDCBP	7.33253e-11	-0.277061	0.915	0.789	2.68378e-06	0
PTPN11	2.56582e-10	-0.631869	0.783	0.726	9.39114e-06	0
CHMP3	3.84874e-10	-0.287615	0.839	0.757	1.40868e-05	0
IFITM2	4.52169e-10	-0.306921	0.72	0.674	1.65498e-05	0
ADAM9	4.63485e-10	-0.299432	0.864	0.704	1.6964e-05	0
COL1A2	3.18422e-09	-0.251781	0.996	0.775	0.000116546	0
MIR4435-2HG	4.98396e-09	-0.283008	0.813	0.705	0.000182418	0
ZFAND5	5.58398e-09	-0.446181	0.76	0.615	0.000204379	0
TP53I3	8.09388e-09	-0.277816	0.579	0.58	0.000296244	0
CENPB	1.10146e-08	-0.276736	0.555	0.518	0.000403146	0
LUM	1.36383e-08	-0.479846	0.589	0.572	0.000499177	0
UACA	2.33604e-08	-0.726363	0.878	0.763	0.000855014	0
NINJ1	3.33257e-08	-0.251912	0.55	0.538	0.00121975	0
GPC1	3.83302e-08	-0.306445	0.769	0.657	0.00140292	0
GDF15	0	1.45937	0.561	0.227	0	1
TNFRSF11B	0	0.877684	0.865	0.472	0	1
COL1A1	0	0.850644	0.991	0.726	0	1
MMP2	0	0.830698	0.967	0.659	0	1
APOE	0	0.796809	0.427	0.161	0	1
COL3A1	0	0.79557	0.908	0.529	0	1
TXNIP	0	0.778874	0.7	0.331	0	1
FN1	0	0.75983	0.994	0.804	0	1
SOX4	0	0.758172	0.797	0.399	0	1
COL1A2	0	0.75014	0.993	0.781	0	1
FGF7	0	0.718092	0.908	0.519	0	1
LUM	0	0.717939	0.857	0.496	0	1
C1S	0	0.693789	0.724	0.333	0	1
BDNF	0	0.684764	0.938	0.543	0	1
MYLK	0	0.670114	0.973	0.771	0	1
CEBPD	0	0.666333	0.798	0.408	0	1
C1R	0	0.653437	0.606	0.26	0	1
PCDH18	0	0.642408	0.792	0.357	0	1
HSPA5	0	0.635295	0.981	0.653	0	1
FILIP1L	0	0.631504	0.871	0.452	0	1
ARID5B	0	0.623861	0.968	0.608	0	1
LRP1	0	0.620522	0.954	0.577	0	1
CLU	0	0.619383	0.917	0.581	0	1
MFAP4	0	0.616624	0.677	0.271	0	1
CEBPB	0	0.61387	0.943	0.546	0	1
SPARC	0	0.605382	0.988	0.785	0	1
SLC3A2	0	0.591148	0.852	0.514	0	1
JUND	0	0.588951	0.962	0.604	0	1
SLC38A2	0	0.581515	0.986	0.638	0	1
RND3	0	0.579461	0.988	0.74	0	1
COL5A2	0	0.57761	0.954	0.615	0	1
STOM	0	0.56963	0.887	0.562	0	1
DUSP1	0	0.559515	0.839	0.468	0	1
GRN	0	0.555116	0.941	0.62	0	1
HLA-B	0	0.551224	0.846	0.496	0	1
F3	0	0.53974	0.82	0.486	0	1
TGFBI	0	0.538927	0.977	0.741	0	1
NFE2L2	0	0.537582	0.942	0.588	0	1
ZMAT3	0	0.52854	0.924	0.502	0	1
PNRC1	0	0.520972	0.774	0.277	0	1
PLPP3	0	0.513611	0.792	0.389	0	1
CD248	0	0.510167	0.917	0.557	0	1
WNT5A	0	0.504923	0.856	0.488	0	1
SERPINE2	0	0.504473	0.941	0.648	0	1
JUNB	0	0.504016	0.703	0.31	0	1
TNFRSF1A	0	0.499368	0.921	0.503	0	1
RHOB	0	0.494849	0.796	0.351	0	1
UBC	0	0.490827	0.998	0.855	0	1
HERPUD1	0	0.484742	0.84	0.412	0	1
PDE5A	0	0.475643	0.908	0.542	0	1
DDIT3	0	0.464262	0.583	0.274	0	1
CITED2	0	0.464051	0.933	0.564	0	1
PLD3	0	0.462749	0.949	0.634	0	1
PSAP	0	0.458958	0.954	0.653	0	1
ZFAND5	0	0.458623	0.942	0.567	0	1
A2M	0	0.456913	0.373	0.133	0	1
ID2	0	0.452937	0.784	0.437	0	1
CTSD	0	0.449851	0.968	0.687	0	1
MDM2	0	0.449022	0.803	0.459	0	1
PAPPA	0	0.448721	0.611	0.252	0	1
CCDC68	0	0.447821	0.764	0.369	0	1
PHLDA3	0	0.447521	0.924	0.547	0	1
SLC16A3	0	0.442668	0.935	0.606	0	1
HLA-A	0	0.440363	0.958	0.678	0	1
ADAMTS1	0	0.44012	0.733	0.395	0	1
FOXF1	0	0.439874	0.886	0.48	0	1
TCF21	0	0.439408	0.79	0.404	0	1
MLLT11	0	0.432148	0.826	0.488	0	1
FBN1	0	0.425286	0.939	0.581	0	1
RAB1A	0	0.425035	0.981	0.697	0	1
PAMR1	0	0.424641	0.793	0.389	0	1
HLA-C	0	0.423998	0.983	0.759	0	1
TSC22D1	0	0.418989	0.82	0.386	0	1
LAMC1	0	0.417491	0.944	0.596	0	1
LBH	0	0.410957	0.817	0.421	0	1
NNMT	0	0.404476	0.732	0.401	0	1
PELO	0	0.404183	0.894	0.503	0	1
EDIL3	0	0.399044	0.865	0.508	0	1
SAT1	0	0.392498	0.832	0.499	0	1
CTSB	0	0.385527	0.983	0.745	0	1
HTRA1	0	0.38426	0.902	0.565	0	1
IGFBP7	0	0.383018	0.998	0.899	0	1
VASN	0	0.381464	0.789	0.352	0	1
CHAC1	0	0.37968	0.574	0.223	0	1
PDLIM4	0	0.37405	0.923	0.579	0	1
LRP10	0	0.366659	0.931	0.581	0	1
TOB1	0	0.363774	0.771	0.333	0	1
SLC1A5	0	0.362677	0.891	0.503	0	1
EFEMP1	0	0.358478	0.891	0.559	0	1
PCYOX1	0	0.356342	0.898	0.522	0	1
PLTP	0	0.354792	0.505	0.208	0	1
CHIC2	0	0.35425	0.863	0.459	0	1
ANGPTL2	0	0.353718	0.544	0.203	0	1
MXD4	0	0.353712	0.937	0.531	0	1
NORAD	0	0.346333	0.908	0.56	0	1
CXXC5	0	0.345068	0.775	0.335	0	1
SLC38A1	0	0.34283	0.883	0.509	0	1
MAGED1	0	0.342036	0.951	0.676	0	1
ITM2B	0	0.339503	0.991	0.785	0	1
CHRM2	0	0.338675	0.684	0.324	0	1
XBP1	0	0.33859	0.897	0.511	0	1
APP	0	0.337134	0.945	0.617	0	1
NINJ1	0	0.335544	0.8	0.468	0	1
EXT1	0	0.335477	0.891	0.523	0	1
MSMO1	0	0.335269	0.681	0.338	0	1
FERMT2	0	0.332015	0.888	0.525	0	1
GRINA	0	0.331974	0.907	0.52	0	1
STC2	0	0.331384	0.822	0.438	0	1
PGRMC2	0	0.330372	0.883	0.486	0	1
SARS	0	0.330161	0.952	0.627	0	1
IRS1	0	0.328364	0.85	0.477	0	1
BMP4	0	0.327569	0.309	0.092	0	1
MAP1A	0	0.326204	0.954	0.659	0	1
IRF2BPL	0	0.324346	0.755	0.368	0	1
NME3	0	0.322468	0.925	0.585	0	1
CTSA	0	0.32132	0.935	0.618	0	1
EMILIN1	0	0.319398	0.852	0.475	0	1
SDF2	0	0.319223	0.9	0.533	0	1
HM13	0	0.318289	0.958	0.661	0	1
TP53I3	0	0.31794	0.837	0.507	0	1
UBE2H	0	0.317322	0.881	0.485	0	1
ATP6V1A	0	0.316349	0.839	0.444	0	1
FBLN5	0	0.313976	0.858	0.494	0	1
TPP1	0	0.312327	0.806	0.421	0	1
YIF1A	0	0.312299	0.971	0.701	0	1
TERF2IP	0	0.312005	0.914	0.552	0	1
MAGED2	0	0.311287	0.928	0.609	0	1
TM2D2	0	0.310999	0.895	0.519	0	1
TMEM179B	0	0.31023	0.933	0.6	0	1
RAB10	0	0.308764	0.938	0.583	0	1
IFI16	0	0.308097	0.771	0.42	0	1
TAF7	0	0.306916	0.926	0.546	0	1
RBMS1	0	0.305306	0.909	0.525	0	1
FADS3	0	0.305256	0.783	0.373	0	1
FAM20C	0	0.30458	0.715	0.366	0	1
FSTL3	0	0.303805	0.738	0.398	0	1
MPZL1	0	0.303332	0.916	0.542	0	1
ITGAV	0	0.302785	0.822	0.456	0	1
LY96	0	0.30259	0.839	0.481	0	1
IER5L	0	0.302507	0.733	0.384	0	1
ATP6AP1	0	0.301518	0.904	0.529	0	1
BMPR2	0	0.300957	0.843	0.469	0	1
CD81	0	0.300377	0.999	0.872	0	1
C16orf87	0	0.299462	0.836	0.483	0	1
EPHX1	0	0.298697	0.681	0.334	0	1
SLFN5	0	0.296611	0.807	0.418	0	1
CYP51A1	0	0.29568	0.775	0.416	0	1
FCGRT	0	0.295131	0.879	0.518	0	1
FAM155A	0	0.293332	0.705	0.337	0	1
ACAP2	0	0.293205	0.88	0.511	0	1
ECM1	0	0.292969	0.866	0.55	0	1
CREBRF	0	0.292064	0.61	0.226	0	1
GSN	0	0.290192	0.945	0.665	0	1
SNX18	0	0.288861	0.815	0.43	0	1
SQLE	0	0.288328	0.677	0.347	0	1
ATG101	0	0.288205	0.882	0.499	0	1
ETS2	0	0.287736	0.751	0.394	0	1
DHRS7	0	0.28697	0.876	0.525	0	1
LGALS3BP	0	0.286085	0.74	0.377	0	1
SCD	0	0.284561	0.548	0.251	0	1
PLXNB2	0	0.283792	0.838	0.445	0	1
MRC2	0	0.283427	0.839	0.479	0	1
WARS	0	0.283147	0.762	0.417	0	1
DNAJB9	0	0.282833	0.696	0.307	0	1
TMEM59	0	0.280704	0.988	0.8	0	1
SERTAD1	0	0.280336	0.746	0.381	0	1
DPP4	0	0.275731	0.589	0.246	0	1
POLD4	0	0.273588	0.909	0.566	0	1
PTPRK	0	0.273528	0.758	0.377	0	1
MBNL2	0	0.272949	0.799	0.405	0	1
C14orf119	0	0.270137	0.928	0.594	0	1
EAPP	0	0.270128	0.799	0.389	0	1
AVPI1	0	0.269439	0.709	0.315	0	1
SCO2	0	0.269368	0.809	0.399	0	1
FDFT1	0	0.264718	0.796	0.45	0	1
CHPF2	0	0.263426	0.768	0.364	0	1
UNC50	0	0.263348	0.797	0.412	0	1
ANTXR1	0	0.263285	0.826	0.473	0	1
RBM4	0	0.261682	0.936	0.589	0	1
PPIC	0	0.258612	0.899	0.53	0	1
BDKRB2	0	0.257786	0.508	0.195	0	1
BAMBI	0	0.257453	0.481	0.187	0	1
GPR37	0	0.256912	0.604	0.249	0	1
CHPF	0	0.256825	0.865	0.484	0	1
BBX	0	0.256685	0.843	0.466	0	1
P4HA2	0	0.256527	0.857	0.477	0	1
DAB2	0	0.255799	0.96	0.627	0	1
CBX6	0	0.25483	0.833	0.463	0	1
PTK7	0	0.25387	0.759	0.4	0	1
PJA2	0	0.253529	0.888	0.52	0	1
TMEM9B	0	0.253465	0.883	0.512	0	1
HLA-E	0	0.253431	0.896	0.544	0	1
GNAI1	0	0.253011	0.743	0.368	0	1
RIT1	0	0.252039	0.746	0.336	0	1
TEX264	0	0.251518	0.798	0.426	0	1
SARAF	0	0.250928	0.936	0.637	0	1
RRM2B	0	0.250632	0.735	0.371	0	1
COL5A1	0	0.250503	0.773	0.417	0	1
SPC25	0	-0.340121	0.015	0.302	0	1
AURKB	0	-0.391602	0.033	0.304	0	1
NUF2	0	-0.455746	0.027	0.319	0	1
KIF2C	0	-0.468917	0.025	0.316	0	1
NCAPG	0	-0.494085	0.042	0.341	0	1
CDCA8	0	-0.498976	0.042	0.313	0	1
SHCBP1	0	-0.513501	0.075	0.378	0	1
CLSPN	0	-0.528528	0.08	0.374	0	1
GTSE1	0	-0.563884	0.048	0.348	0	1
CEP55	0	-0.585988	0.055	0.378	0	1
CDCA3	0	-0.589416	0.063	0.374	0	1
DEPDC1	0	-0.598391	0.057	0.366	0	1
HMMR	0	-0.66687	0.049	0.379	0	1
DLGAP5	0	-0.684215	0.054	0.373	0	1
PBK	0	-0.728005	0.047	0.406	0	1
CDK1	0	-0.730403	0.039	0.336	0	1
CDC20	0	-0.745779	0.064	0.377	0	1
CCNA2	0	-0.774501	0.124	0.405	0	1
NUSAP1	0	-0.778625	0.063	0.402	0	1
MKI67	0	-0.803399	0.035	0.379	0	1
ASPM	0	-0.861752	0.07	0.375	0	1
MAD2L1	0	-0.881966	0.199	0.457	0	1
PRC1	0	-0.960117	0.115	0.443	0	1
BIRC5	0	-0.988915	0.142	0.467	0	1
ANLN	0	-1.03674	0.185	0.448	0	1
RRM2	0	-1.13631	0.111	0.458	0	1
CENPF	0	-1.1798	0.119	0.429	0	1
TOP2A	0	-1.22887	0.111	0.423	0	1
PCLAF	0	-1.35799	0.219	0.499	0	1
UBE2C	0	-1.37348	0.096	0.412	0	1
CCNB2	1.02944e-306	-0.521547	0.084	0.361	3.76786e-302	1
DSEL	1.81693e-306	0.444769	0.941	0.617	6.65013e-302	1
SEC24D	3.937e-306	0.291035	0.891	0.524	1.44098e-301	1
COL12A1	1.22543e-305	0.451036	0.922	0.58	4.4852e-301	1
PDCD6	2.32448e-304	0.262968	0.96	0.67	8.50782e-300	1
MMP14	5.832e-304	0.32099	0.807	0.458	2.13457e-299	1
NECTIN3	6.04234e-304	0.435954	0.915	0.567	2.21156e-299	1
HIST1H2AC	8.09772e-304	0.352302	0.78	0.439	2.96385e-299	1
KNL1	5.20987e-303	-0.377054	0.038	0.305	1.90686e-298	1
[truncated: 13,842 more rows]
