# Supplementary material for: Single-cell transcriptomic analysis uncovers diverse and dynamic senescent cell populations
Source: Aging (Albany NY). 2023 Apr 19;15(8):2824–51. doi: 10.18632/aging.204666 (PMC10188353; doi:10.18632/aging.204666)
Supplement: Supplementary Table 6 [file aging-15-204666-s006.xlsx]

## Sheet: Sheet1
Supplementary Table 6. Marker genes differentially expressed in each cluster versus all other clusters in ETO time course.
gene	p_val	avg_log2FC	pct.1	pct.2	p_val_adj	cluster
MT2A	0	1.14304	0.999	0.985	0	0
SEC61G	0	0.947486	0.998	0.944	0	0
SPARC	0	0.864816	0.997	0.923	0	0
C4orf48	0	0.835817	0.989	0.86	0	0
RNASEK	0	0.823719	0.997	0.951	0	0
RPL39	0	0.822769	0.999	0.977	0	0
OST4	0	0.808954	0.998	0.947	0	0
ATP5MD	0	0.804102	0.996	0.945	0	0
CCL2	0	0.800159	0.524	0.233	0	0
BEX3	0	0.783588	0.997	0.959	0	0
IGFBP5	0	0.7692	0.99	0.902	0	0
POLR2L	0	0.761639	0.997	0.954	0	0
SERF2	0	0.759243	1	0.986	0	0
SELENOW	0	0.758245	0.993	0.921	0	0
GLRX	0	0.754978	0.98	0.844	0	0
KRTCAP2	0	0.752981	0.992	0.87	0	0
C4orf3	0	0.746737	0.991	0.886	0	0
DAB2	0	0.7438	0.983	0.834	0	0
TMEM258	0	0.742338	0.993	0.888	0	0
QSOX1	0	0.740765	0.984	0.878	0	0
CCN2	0	0.740651	0.97	0.769	0	0
UQCR11	0	0.739789	0.997	0.939	0	0
COL1A1	0	0.733958	0.997	0.904	0	0
UQCRQ	0	0.716327	0.995	0.92	0	0
SELENOM	0	0.715507	0.997	0.928	0	0
RPS28	0	0.714918	1	0.984	0	0
COPS9	0	0.714773	0.993	0.894	0	0
KRT10	0	0.71049	0.991	0.834	0	0
SEC61B	0	0.704266	0.996	0.947	0	0
FTH1	0	0.702542	1	0.998	0	0
TOMM7	0	0.700586	0.997	0.946	0	0
ATOX1	0	0.699745	0.994	0.931	0	0
MT1E	0	0.697599	0.954	0.777	0	0
LOX	0	0.696732	0.964	0.764	0	0
MFGE8	0	0.687917	0.994	0.923	0	0
ELOB	0	0.687877	0.998	0.946	0	0
CTHRC1	0	0.681046	0.96	0.854	0	0
NDUFA11	0	0.68045	0.997	0.942	0	0
CTSC	0	0.677089	0.979	0.853	0	0
NOP10	0	0.676543	0.994	0.895	0	0
MYL9	0	0.673766	0.998	0.968	0	0
UQCR10	0	0.672172	0.996	0.92	0	0
IGFBP4	0	0.66874	0.995	0.921	0	0
SH3BGRL3	0	0.666621	0.999	0.971	0	0
MPC2	0	0.666493	0.985	0.863	0	0
UBL5	0	0.660781	0.996	0.941	0	0
TMSB10	0	0.660689	1	0.997	0	0
GABARAP	0	0.6596	0.997	0.916	0	0
CAMK2N1	0	0.648915	0.992	0.902	0	0
ATP5F1E	0	0.647052	0.999	0.964	0	0
PDLIM2	0	0.645621	0.991	0.859	0	0
IFI27L2	0	0.640994	0.989	0.864	0	0
NME4	0	0.639067	0.985	0.837	0	0
FN1	0	0.634266	0.999	0.947	0	0
ATP5ME	0	0.634234	0.994	0.904	0	0
COMMD6	0	0.631137	0.993	0.917	0	0
GUK1	0	0.630707	0.995	0.932	0	0
DYNLL1	0	0.628973	0.998	0.95	0	0
FTL	0	0.627091	1	0.999	0	0
TOMM5	0	0.626536	0.991	0.885	0	0
NDUFA4	0	0.621365	0.996	0.937	0	0
RABAC1	0	0.620114	0.996	0.924	0	0
BRI3	0	0.619127	0.995	0.951	0	0
ATP5MPL	0	0.618247	0.994	0.921	0	0
RPL35A	0	0.616833	0.999	0.967	0	0
ATP6V0E1	0	0.616092	0.995	0.967	0	0
ATP5MC1	0	0.615174	0.992	0.884	0	0
GAS6	0	0.612415	0.991	0.914	0	0
CKAP4	0	0.611843	0.993	0.863	0	0
VKORC1	0	0.611004	0.993	0.893	0	0
COX6B1	0	0.610721	0.996	0.931	0	0
C9orf16	0	0.606355	0.988	0.86	0	0
S100A13	0	0.605816	0.996	0.945	0	0
RPS21	0	0.599622	0.999	0.964	0	0
NEDD8	0	0.596457	0.996	0.948	0	0
RPL41	0	0.595922	1	0.993	0	0
RPL28	0	0.594258	1	0.99	0	0
MIF	0	0.593041	0.998	0.961	0	0
CSTB	0	0.589547	0.997	0.929	0	0
ATP5MG	0	0.587608	0.997	0.949	0	0
VAMP5	0	0.585322	0.987	0.86	0	0
NDUFAF8	0	0.583178	0.993	0.9	0	0
GTF2H5	0	0.581774	0.99	0.883	0	0
GNG5	0	0.581228	0.996	0.925	0	0
MMP2	0	0.581074	0.979	0.827	0	0
COX14	0	0.580967	0.971	0.797	0	0
RTL8C	0	0.578794	0.989	0.892	0	0
ATP5MF	0	0.577197	0.996	0.912	0	0
COPZ2	0	0.571218	0.975	0.803	0	0
EMP3	0	0.569642	0.995	0.917	0	0
ATP5F1D	0	0.56562	0.994	0.904	0	0
TXNDC17	0	0.565453	0.994	0.894	0	0
RPL36	0	0.564508	0.999	0.975	0	0
POMP	0	0.563716	0.998	0.952	0	0
CAV1	0	0.560698	0.997	0.957	0	0
NAA38	0	0.560016	0.986	0.89	0	0
TMA7	0	0.559967	0.996	0.932	0	0
PFN1	0	0.559861	0.999	0.968	0	0
UQCRH	0	0.557588	0.996	0.945	0	0
CITED2	0	0.555724	0.926	0.683	0	0
ATP6V0C	0	0.554735	0.993	0.877	0	0
S100A6	0	0.554654	1	0.993	0	0
NME2	0	0.552889	0.999	0.963	0	0
COL1A2	0	0.552432	0.999	0.935	0	0
RNF7	0	0.549262	0.992	0.9	0	0
A1BG	0	0.54922	0.921	0.635	0	0
CUTA	0	0.549212	0.994	0.902	0	0
MRPL41	0	0.549109	0.993	0.889	0	0
JOSD2	0	0.548856	0.975	0.788	0	0
MICOS13	0	0.547162	0.991	0.867	0	0
ATP6V1G1	0	0.547154	0.994	0.919	0	0
TRAPPC1	0	0.543435	0.993	0.878	0	0
MICOS10	0	0.54141	0.993	0.904	0	0
C19orf53	0	0.538558	0.994	0.905	0	0
ITGAE	0	0.538211	0.98	0.834	0	0
CALM2	0	0.538017	1	0.984	0	0
C1orf122	0	0.533636	0.99	0.871	0	0
RPLP2	0	0.533537	1	0.983	0	0
COX8A	0	0.533488	0.997	0.919	0	0
RPS5	0	0.531848	0.998	0.966	0	0
PPDPF	0	0.530402	0.997	0.931	0	0
KDELR2	0	0.530201	0.995	0.897	0	0
NDUFB2	0	0.530172	0.995	0.932	0	0
COX7C	0	0.52992	0.996	0.927	0	0
ZNHIT1	0	0.528228	0.991	0.885	0	0
SERINC2	0	0.526668	0.958	0.768	0	0
HINT1	0	0.526092	0.997	0.959	0	0
RPL34	0	0.525355	1	0.982	0	0
NPDC1	0	0.521988	0.943	0.697	0	0
EVA1B	0	0.521794	0.989	0.851	0	0
TIMM8B	0	0.520588	0.982	0.812	0	0
MYL6	0	0.519881	1	0.987	0	0
RPS27L	0	0.517659	0.998	0.983	0	0
CCDC80	0	0.515647	0.982	0.89	0	0
CHPF	0	0.514409	0.926	0.626	0	0
COX7B	0	0.511146	0.991	0.89	0	0
HSBP1	0	0.511099	0.994	0.907	0	0
DDT	0	0.510841	0.991	0.875	0	0
MT1X	0	0.508546	0.691	0.373	0	0
RHOC	0	0.507426	0.994	0.913	0	0
ATP6V1F	0	0.50688	0.994	0.894	0	0
SNHG29	0	0.505623	0.997	0.975	0	0
NDUFA3	0	0.50559	0.954	0.729	0	0
COX7A2	0	0.505248	0.996	0.958	0	0
COL3A1	0	0.503293	0.954	0.764	0	0
RPL36AL	0	0.501664	0.995	0.908	0	0
COX5B	0	0.500232	0.993	0.905	0	0
ATP5MC3	0	0.500175	0.995	0.899	0	0
RPS13	0	0.500044	0.999	0.96	0	0
MRPL52	0	0.499391	0.988	0.872	0	0
RGCC	0	0.49927	0.742	0.403	0	0
FSTL1	0	0.496845	0.991	0.89	0	0
RPL32	0	0.495403	0.999	0.981	0	0
LY6E	0	0.49367	0.982	0.804	0	0
OSTC	0	0.492285	0.994	0.941	0	0
RPL12	0	0.490405	0.999	0.977	0	0
DAD1	0	0.487622	0.993	0.911	0	0
STMP1	0	0.486622	0.989	0.906	0	0
ATP5IF1	0	0.484417	0.994	0.926	0	0
HOXB-AS3	0	0.483958	0.934	0.723	0	0
THY1	0	0.480674	0.983	0.828	0	0
MYDGF	0	0.479559	0.991	0.893	0	0
BRK1	0	0.479317	0.993	0.924	0	0
RPS12	0	0.478992	1	0.988	0	0
EFEMP2	0	0.478255	0.979	0.834	0	0
PFN2	0	0.477199	0.983	0.876	0	0
ATP5PF	0	0.471955	0.994	0.911	0	0
PRDX6	0	0.471701	0.998	0.979	0	0
NDUFA1	0	0.47116	0.986	0.864	0	0
NUPR1	0	0.470977	0.974	0.799	0	0
NDUFS6	0	0.469394	0.995	0.916	0	0
TIMP2	0	0.468254	0.99	0.93	0	0
GSTP1	0	0.467527	0.999	0.956	0	0
RRAS	0	0.464779	0.983	0.834	0	0
NDUFB1	0	0.464046	0.988	0.866	0	0
TRAPPC5	0	0.462491	0.992	0.877	0	0
SSR4	0	0.461913	0.995	0.907	0	0
TMEM219	0	0.461681	0.971	0.794	0	0
POLD4	0	0.460641	0.967	0.758	0	0
CDK2AP1	0	0.458869	0.991	0.906	0	0
FAU	0	0.458214	0.998	0.957	0	0
RPL29	0	0.457815	0.999	0.975	0	0
RPS23	0	0.457672	0.999	0.973	0	0
RPS15	0	0.45715	0.999	0.978	0	0
COL6A1	0	0.456128	0.989	0.873	0	0
HSPB1	0	0.455205	0.999	0.951	0	0
MRPS21	0	0.454091	0.994	0.916	0	0
SRP14	0	0.453879	0.999	0.962	0	0
PHLDA2	0	0.453054	0.991	0.886	0	0
ELOC	0	0.450881	0.988	0.91	0	0
RTN4	0	0.449593	0.999	0.979	0	0
NENF	0	0.448029	0.982	0.841	0	0
MXD4	0	0.446549	0.954	0.742	0	0
PLOD1	0	0.445829	0.946	0.718	0	0
TIMP1	0	0.444441	1	0.973	0	0
KRTAP2-3	0	0.444249	0.436	0.159	0	0
EMC6	0	0.443806	0.977	0.786	0	0
TGFBI	0	0.443622	0.989	0.89	0	0
YIF1A	0	0.44342	0.981	0.804	0	0
GRINA	0	0.440151	0.948	0.714	0	0
CYTOR	0	0.439542	0.991	0.926	0	0
LSM7	0	0.439204	0.988	0.866	0	0
RPL11	0	0.439139	0.999	0.984	0	0
DPM3	0	0.438503	0.882	0.604	0	0
TMEM256	0	0.438288	0.944	0.716	0	0
TIMM13	0	0.437266	0.988	0.842	0	0
CD59	0	0.433781	0.996	0.929	0	0
SYNGR1	0	0.433732	0.907	0.603	0	0
NAA10	0	0.433559	0.982	0.845	0	0
AP2S1	0	0.432873	0.994	0.914	0	0
RPS26	0	0.432872	0.998	0.965	0	0
FIS1	0	0.431749	0.988	0.862	0	0
RWDD1	0	0.431511	0.982	0.851	0	0
CD248	0	0.43147	0.931	0.639	0	0
AC010642.2	0	0.430894	0.92	0.653	0	0
COX7A1	0	0.430682	0.542	0.248	0	0
RPS14	0	0.430444	0.999	0.983	0	0
TMEM167A	0	0.428843	0.99	0.914	0	0
S100A16	0	0.427577	0.986	0.852	0	0
POLR2I	0	0.425226	0.974	0.783	0	0
GTF2A2	0	0.423108	0.986	0.863	0	0
NDUFS5	0	0.423005	0.997	0.936	0	0
HEBP1	0	0.422642	0.954	0.736	0	0
TMEM47	0	0.421921	0.869	0.608	0	0
TRAM1	0	0.419757	0.988	0.93	0	0
COTL1	0	0.418917	0.992	0.931	0	0
LAMTOR5	0	0.418078	0.991	0.881	0	0
CD81	0	0.418035	0.995	0.902	0	0
LGALS1	0	0.415259	1	0.995	0	0
PCYOX1	0	0.415147	0.935	0.708	0	0
TMCO1	0	0.415034	0.988	0.868	0	0
MRPL57	0	0.413334	0.981	0.832	0	0
CCDC85B	0	0.412769	0.987	0.861	0	0
RPL8	0	0.412394	0.999	0.971	0	0
SSR3	0	0.411459	0.995	0.923	0	0
LAMTOR4	0	0.410998	0.99	0.869	0	0
LRP10	0	0.408866	0.965	0.769	0	0
TCEAL9	0	0.408804	0.99	0.884	0	0
RPS8	0	0.407802	0.999	0.978	0	0
CAV2	0	0.406735	0.985	0.906	0	0
MCFD2	0	0.406298	0.988	0.891	0	0
RPL22	0	0.405916	0.998	0.962	0	0
CSNK2B	0	0.405485	0.982	0.84	0	0
JTB	0	0.405389	0.984	0.845	0	0
TGM2	0	0.403736	0.845	0.558	0	0
ANAPC11	0	0.402677	0.991	0.882	0	0
PXDN	0	0.40205	0.981	0.859	0	0
MIEN1	0	0.402023	0.96	0.756	0	0
MLLT11	0	0.401604	0.867	0.609	0	0
NDUFB4	0	0.401554	0.988	0.867	0	0
DYNLT1	0	0.400693	0.993	0.907	0	0
FLNA	0	0.400431	0.983	0.865	0	0
NDUFB7	0	0.40023	0.992	0.89	0	0
SLC16A3	0	0.399927	0.971	0.77	0	0
ZFAND5	0	0.398875	0.958	0.793	0	0
PHPT1	0	0.398596	0.995	0.93	0	0
RPS19	0	0.397922	1	0.994	0	0
S100A11	0	0.397195	0.999	0.974	0	0
C12orf57	0	0.396273	0.982	0.839	0	0
MRPL36	0	0.396079	0.981	0.812	0	0
GRN	0	0.393882	0.974	0.769	0	0
KDELR3	0	0.393877	0.966	0.766	0	0
TPT1	0	0.392739	1	0.989	0	0
HSPB6	0	0.392637	0.914	0.697	0	0
TOMM6	0	0.392279	0.992	0.86	0	0
ROMO1	0	0.392059	0.986	0.855	0	0
SNRPD2	0	0.391727	0.992	0.885	0	0
LSM10	0	0.391195	0.952	0.713	0	0
SCAND1	0	0.390587	0.984	0.827	0	0
CDKN1A	0	0.389621	0.973	0.838	0	0
MZT2B	0	0.389386	0.994	0.901	0	0
KRTAP1-5	0	0.389083	0.442	0.121	0	0
LINC02802	0	0.38823	0.95	0.775	0	0
COX17	0	0.387981	0.943	0.747	0	0
DPH3	0	0.387404	0.95	0.751	0	0
SERP1	0	0.386538	0.992	0.898	0	0
FAM177A1	0	0.386201	0.982	0.887	0	0
CYB5R3	0	0.385735	0.989	0.9	0	0
WFDC1	0	0.385617	0.793	0.486	0	0
SSR1	0	0.384792	0.973	0.834	0	0
PFDN5	0	0.384329	0.998	0.971	0	0
RBX1	0	0.383467	0.992	0.91	0	0
NBDY	0	0.382408	0.974	0.856	0	0
CHCHD10	0	0.382023	0.918	0.69	0	0
RPL10	0	0.381983	1	0.992	0	0
CST3	0	0.381597	0.994	0.903	0	0
SRM	0	0.381186	0.99	0.886	0	0
MTLN	0	0.380572	0.9	0.61	0	0
SUB1	0	0.379798	0.996	0.944	0	0
DKK3	0	0.379077	0.987	0.917	0	0
TMED2	0	0.378464	0.984	0.868	0	0
TMEM208	0	0.378335	0.973	0.797	0	0
RPS25	0	0.378098	0.998	0.956	0	0
SPCS1	0	0.378042	0.99	0.874	0	0
SNU13	0	0.377952	0.992	0.918	0	0
RPL26	0	0.37781	0.999	0.98	0	0
YIPF3	0	0.376145	0.972	0.794	0	0
ATP6V0B	0	0.376118	0.989	0.866	0	0
RPL18	0	0.375273	0.999	0.969	0	0
ATP5MC2	0	0.37526	0.994	0.903	0	0
RPL18A	0	0.375042	0.999	0.98	0	0
POLR2J	0	0.374566	0.987	0.839	0	0
TSPAN4	0	0.374313	0.986	0.859	0	0
ERLEC1	0	0.373517	0.962	0.803	0	0
TMED3	0	0.372319	0.97	0.829	0	0
GJA1	0	0.3719	0.89	0.635	0	0
PNKD	0	0.371456	0.956	0.757	0	0
METRN	0	0.371244	0.939	0.724	0	0
CIAO2B	0	0.37102	0.99	0.875	0	0
RAB5IF	0	0.37072	0.984	0.839	0	0
RPLP1	0	0.370395	1	0.993	0	0
CAP1	0	0.369826	0.992	0.915	0	0
CD151	0	0.368905	0.991	0.879	0	0
CHURC1	0	0.366916	0.987	0.889	0	0
LAMTOR2	0	0.364839	0.974	0.799	0	0
EIF2S2	0	0.364702	0.994	0.911	0	0
PEA15	0	0.364579	0.969	0.84	0	0
RPS18	0	0.364039	1	0.992	0	0
TSPO	0	0.363249	0.996	0.927	0	0
NDUFA2	0	0.363241	0.979	0.835	0	0
MGST1	0	0.362157	0.996	0.967	0	0
OAZ1	0	0.361435	0.998	0.963	0	0
GPX4	0	0.360418	0.995	0.935	0	0
RPS24	0	0.359265	0.999	0.984	0	0
TCEAL8	0	0.359201	0.96	0.74	0	0
MRPL14	0	0.358488	0.982	0.813	0	0
PCBD1	0	0.358063	0.937	0.702	0	0
PLAC9	0	0.358002	0.896	0.648	0	0
RPL24	0	0.357719	0.999	0.968	0	0
NDUFB11	0	0.357143	0.99	0.869	0	0
WDR83OS	0	0.356667	0.992	0.885	0	0
SHC1	0	0.356074	0.976	0.876	0	0
FKBP1A	0	0.355922	0.994	0.95	0	0
RPL35	0	0.355866	0.999	0.975	0	0
NDUFC2	0	0.355593	0.995	0.905	0	0
PRDX5	0	0.355558	0.992	0.902	0	0
RPL37A	0	0.355089	1	0.986	0	0
ZYX	0	0.354865	0.968	0.803	0	0
GABARAPL1	0	0.354214	0.914	0.676	0	0
FLNC	0	0.353023	0.911	0.7	0	0
RPL19	0	0.352841	0.999	0.971	0	0
TMEM147	0	0.352753	0.979	0.808	0	0
RPL37	0	0.351885	1	0.984	0	0
CYBA	0	0.351807	0.936	0.783	0	0
NDUFB10	0	0.351194	0.992	0.871	0	0
SEC62	0	0.350331	0.985	0.894	0	0
ZNF593	0	0.349709	0.942	0.689	0	0
RPL27	0	0.349633	0.999	0.959	0	0
RPS19BP1	0	0.349625	0.983	0.833	0	0
CTSB	0	0.348467	0.985	0.848	0	0
H2AFJ	0	0.348389	0.972	0.823	0	0
RPS15A	0	0.347776	0.999	0.984	0	0
DDA1	0	0.347693	0.956	0.785	0	0
UQCRB	0	0.346717	0.994	0.908	0	0
PSAP	0	0.346602	0.971	0.826	0	0
CLTB	0	0.346488	0.984	0.88	0	0
SF3B6	0	0.345889	0.99	0.88	0	0
MMP24OS	0	0.344566	0.963	0.807	0	0
PET100	0	0.343013	0.958	0.764	0	0
RAMP1	0	0.342394	0.915	0.65	0	0
RPS27	0	0.342112	0.999	0.978	0	0
P4HB	0	0.341531	0.992	0.9	0	0
SERPINE2	0	0.341507	0.982	0.861	0	0
UBA52	0	0.341182	1	0.97	0	0
GNG10	0	0.340662	0.986	0.891	0	0
SF3B5	0	0.340182	0.989	0.852	0	0
KDELR1	0	0.339609	0.99	0.884	0	0
POLR2F	0	0.338228	0.974	0.822	0	0
ARL2BP	0	0.337313	0.945	0.759	0	0
UQCC2	0	0.3373	0.981	0.839	0	0
RPS4X	0	0.337256	0.999	0.973	0	0
MAP1LC3A	0	0.337044	0.934	0.69	0	0
HIGD2A	0	0.335429	0.973	0.803	0	0
ANXA5	0	0.335421	0.999	0.987	0	0
STUB1	0	0.334009	0.987	0.87	0	0
BTF3	0	0.333587	0.997	0.93	0	0
TXNL4A	0	0.333564	0.982	0.883	0	0
RPS3	0	0.332076	0.999	0.971	0	0
PRNP	0	0.331952	0.929	0.717	0	0
APRT	0	0.331932	0.989	0.879	0	0
COA3	0	0.331336	0.957	0.734	0	0
SNX3	0	0.330818	0.989	0.932	0	0
EDF1	0	0.330035	0.996	0.94	0	0
CCDC107	0	0.329459	0.938	0.686	0	0
RPS17	0	0.326189	0.998	0.948	0	0
COA4	0	0.326168	0.967	0.791	0	0
ATP5PO	0	0.325185	0.984	0.858	0	0
FAM229B	0	0.324651	0.899	0.623	0	0
SMPD1	0	0.324183	0.896	0.585	0	0
CD99	0	0.324168	0.993	0.924	0	0
TMEM230	0	0.323572	0.982	0.892	0	0
GNAI2	0	0.322791	0.993	0.916	0	0
NDUFA7	0	0.322001	0.972	0.82	0	0
PPIC	0	0.321834	0.95	0.711	0	0
SMIM26	0	0.321077	0.94	0.712	0	0
POLR2K	0	0.320289	0.979	0.824	0	0
TNFRSF1A	0	0.319888	0.945	0.731	0	0
ITGB1	0	0.319851	0.998	0.969	0	0
DBI	0	0.319526	0.99	0.87	0	0
ARF4	0	0.319479	0.996	0.974	0	0
DYNLRB1	0	0.319268	0.994	0.889	0	0
SEC61A1	0	0.31922	0.972	0.85	0	0
GNB2	0	0.318292	0.985	0.843	0	0
IGFBP6	0	0.318184	0.981	0.843	0	0
GABARAPL2	0	0.318054	0.985	0.864	0	0
CTSD	0	0.317858	0.976	0.786	0	0
BLOC1S1	0	0.313957	0.985	0.843	0	0
ZNF667-AS1	0	0.31356	0.861	0.609	0	0
SNHG16	0	0.312149	0.984	0.867	0	0
RPL30	0	0.311028	0.999	0.972	0	0
SUMO1	0	0.309957	0.983	0.892	0	0
TLE5	0	0.309764	0.976	0.862	0	0
MRPS12	0	0.309702	0.961	0.753	0	0
STC2	0	0.309331	0.869	0.594	0	0
C18orf32	0	0.307595	0.975	0.813	0	0
NDUFS8	0	0.307153	0.987	0.874	0	0
ETHE1	0	0.306756	0.957	0.801	0	0
MRPL20	0	0.306053	0.99	0.877	0	0
LAMTOR1	0	0.30599	0.983	0.859	0	0
NPC2	0	0.305273	0.989	0.867	0	0
MRPL55	0	0.305127	0.942	0.722	0	0
FXYD5	0	0.304922	0.973	0.817	0	0
CIB1	0	0.304893	0.98	0.843	0	0
CHPF2	0	0.303907	0.843	0.526	0	0
BOLA3	0	0.303664	0.944	0.741	0	0
SNRPG	0	0.30337	0.985	0.851	0	0
PRR13	0	0.302712	0.973	0.819	0	0
COX5A	0	0.302391	0.989	0.87	0	0
FAAP20	0	0.302063	0.974	0.826	0	0
EEF1B2	0	0.302024	0.998	0.943	0	0
EHD2	0	0.301978	0.959	0.793	0	0
HIGD1A	0	0.301629	0.963	0.805	0	0
POLE4	0	0.301571	0.968	0.786	0	0
VAMP2	0	0.301393	0.928	0.731	0	0
NME3	0	0.301155	0.938	0.726	0	0
MGAT4B	0	0.300803	0.941	0.737	0	0
TMSB4X	0	0.300744	1	0.99	0	0
LBH	0	0.30072	0.902	0.64	0	0
EIF1	0	0.300313	0.999	0.969	0	0
MSRB2	0	0.300072	0.958	0.747	0	0
RPL17	0	0.300022	0.999	0.979	0	0
TMEM141	0	0.299952	0.903	0.63	0	0
SOD1	0	0.299389	0.994	0.926	0	0
SSU72	0	0.298145	0.979	0.854	0	0
PRELID1	0	0.297634	0.99	0.863	0	0
NDUFA13	0	0.296288	0.996	0.943	0	0
SNHG18	0	0.295573	0.859	0.617	0	0
MGST3	0	0.29546	0.995	0.942	0	0
IER3IP1	0	0.295181	0.976	0.818	0	0
METTL26	0	0.294165	0.98	0.836	0	0
ISOC2	0	0.291652	0.944	0.729	0	0
TMEM98	0	0.291245	0.924	0.687	0	0
ERH	0	0.290273	0.991	0.889	0	0
OSTN-AS1	0	0.290166	0.486	0.187	0	0
MRPL43	0	0.290014	0.961	0.775	0	0
RNF181	0	0.289159	0.984	0.84	0	0
PPP1R14B-AS1	0	0.288817	0.809	0.48	0	0
DCTN3	0	0.288419	0.977	0.826	0	0
COX16	0	0.28822	0.977	0.847	0	0
SLC25A1	0	0.287796	0.916	0.678	0	0
RPL13	0	0.287692	1	0.992	0	0
SDF4	0	0.287646	0.97	0.81	0	0
AP1S1	0	0.287627	0.976	0.847	0	0
CAPNS1	0	0.287516	0.986	0.888	0	0
EI24	0	0.286648	0.979	0.82	0	0
MLF2	0	0.286595	0.986	0.879	0	0
CFL2	0	0.286	0.978	0.866	0	0
TRIR	0	0.285204	0.991	0.897	0	0
REX1BD	0	0.285051	0.961	0.774	0	0
UXT	0	0.284375	0.975	0.812	0	0
UCHL1	0	0.284298	0.995	0.957	0	0
SYNGR2	0	0.282163	0.759	0.397	0	0
FAM174C	0	0.281841	0.942	0.735	0	0
ARF6	0	0.281166	0.939	0.712	0	0
NDUFC1	0	0.28041	0.983	0.845	0	0
ELOVL1	0	0.279974	0.927	0.679	0	0
AK1	0	0.279717	0.974	0.823	0	0
RPL36A	0	0.279593	0.997	0.936	0	0
ENG	0	0.278967	0.926	0.719	0	0
HIST1H2AC	0	0.278573	0.902	0.693	0	0
LITAF	0	0.277973	0.958	0.789	0	0
SURF4	0	0.277958	0.965	0.822	0	0
COX6A1	0	0.277934	0.994	0.904	0	0
CBX6	0	0.276704	0.885	0.643	0	0
FDX2	0	0.276379	0.931	0.699	0	0
GPC1	0	0.276344	0.94	0.729	0	0
PRAF2	0	0.275808	0.883	0.602	0	0
TMEM179B	0	0.275359	0.957	0.758	0	0
SELENOH	0	0.274654	0.989	0.892	0	0
MRPL17	0	0.272843	0.95	0.737	0	0
IFT20	0	0.272818	0.94	0.753	0	0
TP53TG1	0	0.272699	0.911	0.644	0	0
SHISA5	0	0.272193	0.931	0.746	0	0
LARP6	0	0.271934	0.978	0.859	0	0
MRPL33	0	0.271753	0.983	0.885	0	0
EIF3K	0	0.271155	0.989	0.907	0	0
TMEM50A	0	0.270878	0.985	0.86	0	0
HEBP2	0	0.270754	0.969	0.8	0	0
SNHG9	0	0.269941	0.805	0.537	0	0
PDCD5	0	0.269792	0.985	0.867	0	0
SFT2D1	0	0.269609	0.944	0.758	0	0
RNASEH2C	0	0.269561	0.962	0.783	0	0
SEM1	0	0.269127	0.989	0.905	0	0
RPS29	0	0.268682	0.998	0.967	0	0
EMILIN1	0	0.268113	0.877	0.601	0	0
MGAT1	0	0.267952	0.883	0.618	0	0
SWI5	0	0.267296	0.955	0.784	0	0
MYL6B	0	0.267253	0.968	0.802	0	0
ATP6AP1	0	0.265852	0.928	0.675	0	0
TBCA	0	0.265542	0.993	0.957	0	0
CDC42EP5	0	0.263489	0.808	0.472	0	0
VAT1	0	0.263132	0.895	0.626	0	0
RALBP1	0	0.261775	0.973	0.839	0	0
RPL38	0	0.261756	0.998	0.945	0	0
ADIPOR1	0	0.261489	0.89	0.658	0	0
FBLN5	0	0.261425	0.914	0.686	0	0
RPS10	0	0.261149	0.993	0.906	0	0
SDC3	0	0.260139	0.824	0.514	0	0
TRMT112	0	0.259644	0.99	0.874	0	0
COPZ1	0	0.259546	0.967	0.802	0	0
SNHG8	0	0.258215	0.979	0.872	0	0
TMEM14A	0	0.257461	0.869	0.582	0	0
HDDC2	0	0.256756	0.933	0.695	0	0
PDLIM4	0	0.25667	0.921	0.706	0	0
TIMM17A	0	0.256609	0.968	0.836	0	0
COX7A2L	0	0.256003	0.989	0.906	0	0
NDUFB3	0	0.255669	0.979	0.838	0	0
JUND	0	0.254365	0.971	0.79	0	0
DENND10	0	0.253721	0.921	0.722	0	0
MRPL54	0	0.252969	0.958	0.766	0	0
KXD1	0	0.252742	0.904	0.684	0	0
SMDT1	0	0.251888	0.94	0.732	0	0
PLXNB2	0	0.251422	0.896	0.662	0	0
LEPROTL1	0	0.250521	0.92	0.699	0	0
SMIM3	0	0.250502	0.792	0.497	0	0
COX6C	0	0.250336	0.997	0.932	0	0
CKMT2-AS1	0	-0.25051	0.26	0.463	0	0
MAPK8IP3	0	-0.253176	0.271	0.472	0	0
RTTN	0	-0.255653	0.172	0.39	0	0
LINC01619	0	-0.256019	0.086	0.303	0	0
TRIM66	0	-0.258713	0.181	0.393	0	0
JAK2	0	-0.258971	0.245	0.455	0	0
MT-ATP8	0	-0.260434	0.176	0.425	0	0
AL731577.2	0	-0.260952	0.068	0.367	0	0
C11orf80	0	-0.261361	0.161	0.4	0	0
NVL	0	-0.26248	0.322	0.518	0	0
KANSL1L	0	-0.262697	0.185	0.404	0	0
LINC00894	0	-0.264167	0.08	0.328	0	0
ORC2	0	-0.265367	0.373	0.552	0	0
ZRANB3	0	-0.266086	0.223	0.449	0	0
CCDC57	0	-0.267642	0.225	0.465	0	0
PIGL	0	-0.270246	0.335	0.516	0	0
MRTFB	0	-0.27127	0.263	0.479	0	0
AC009120.2	0	-0.271384	0.151	0.429	0	0
ANKRD36	0	-0.271836	0.128	0.409	0	0
STAT5B	0	-0.271858	0.283	0.493	0	0
EVC	0	-0.272115	0.213	0.454	0	0
MFSD4B	0	-0.273724	0.299	0.508	0	0
ZNF254	0	-0.276757	0.193	0.446	0	0
UBE3D	0	-0.278554	0.186	0.405	0	0
ZNF10	0	-0.279597	0.212	0.43	0	0
HDAC4	0	-0.28024	0.255	0.475	0	0
NR2C2	0	-0.281143	0.331	0.516	0	0
TET3	0	-0.281202	0.173	0.424	0	0
ZNF438	0	-0.281507	0.242	0.444	0	0
NUP160	0	-0.282777	0.369	0.557	0	0
ELP4	0	-0.283101	0.213	0.461	0	0
PHLPP1	0	-0.283699	0.177	0.393	0	0
KLHL22	0	-0.284934	0.314	0.508	0	0
PHYKPL	0	-0.286683	0.398	0.563	0	0
ZDHHC17	0	-0.287124	0.337	0.539	0	0
TTLL5	0	-0.288893	0.231	0.458	0	0
SCN1A-AS1	0	-0.290864	0.129	0.422	0	0
PDE7A	0	-0.292153	0.21	0.465	0	0
ATXN7	0	-0.294061	0.34	0.528	0	0
S100PBP	0	-0.294212	0.43	0.586	0	0
PEX14	0	-0.295551	0.429	0.581	0	0
MGA	0	-0.298544	0.407	0.572	0	0
AC074032.1	0	-0.299651	0.229	0.519	0	0
UBN2	0	-0.299869	0.31	0.518	0	0
ARHGAP42	0	-0.301438	0.242	0.468	0	0
SLC10A7	0	-0.302052	0.203	0.445	0	0
RFX3	0	-0.302505	0.116	0.409	0	0
NBPF15	0	-0.303552	0.207	0.466	0	0
LUC7L	0	-0.303637	0.478	0.618	0	0
FBXO34	0	-0.304555	0.37	0.537	0	0
MICAL3	0	-0.305485	0.353	0.539	0	0
TTC27	0	-0.306308	0.241	0.495	0	0
ANKS1A	0	-0.30654	0.304	0.512	0	0
ANKUB1	0	-0.307569	0.13	0.406	0	0
ASXL2	0	-0.307618	0.492	0.62	0	0
AGO4	0	-0.308082	0.253	0.484	0	0
BICRAL	0	-0.308272	0.256	0.476	0	0
DOP1A	0	-0.312473	0.253	0.48	0	0
POU2F1	0	-0.31303	0.236	0.475	0	0
PAXBP1	0	-0.313657	0.314	0.559	0	0
USP3	0	-0.313784	0.483	0.624	0	0
BTAF1	0	-0.315709	0.362	0.56	0	0
COL24A1	0	-0.317414	0.162	0.386	0	0
SRGAP2	0	-0.317685	0.398	0.575	0	0
ARHGEF11	0	-0.318246	0.291	0.508	0	0
KHDC4	0	-0.318265	0.296	0.536	0	0
DENND1B	0	-0.318359	0.309	0.508	0	0
STRN	0	-0.322151	0.417	0.595	0	0
ARHGAP32	0	-0.324347	0.208	0.478	0	0
NOL10	0	-0.325056	0.52	0.645	0	0
GTF2IRD1	0	-0.325691	0.255	0.504	0	0
ZNF532	0	-0.32611	0.372	0.559	0	0
CBR4	0	-0.326423	0.45	0.617	0	0
MFSD14C	0	-0.326772	0.465	0.614	0	0
GPR135	0	-0.327304	0.16	0.392	0	0
SMG7	0	-0.327373	0.569	0.662	0	0
RBM5	0	-0.328028	0.554	0.663	0	0
GABPB1-AS1	0	-0.328054	0.348	0.541	0	0
APBA1	0	-0.328777	0.202	0.431	0	0
YTHDC2	0	-0.330632	0.455	0.611	0	0
RCOR1	0	-0.330634	0.47	0.609	0	0
FANCC	0	-0.332323	0.293	0.494	0	0
MBTD1	0	-0.335174	0.221	0.507	0	0
TRPC1	0	-0.335394	0.279	0.506	0	0
EXOC2	0	-0.336546	0.496	0.63	0	0
FIGN	0	-0.337021	0.247	0.478	0	0
TANGO6	0	-0.337566	0.308	0.531	0	0
TYW1	0	-0.337632	0.378	0.592	0	0
SHPRH	0	-0.338297	0.296	0.545	0	0
XPO4	0	-0.338384	0.372	0.588	0	0
LINC-PINT	0	-0.33867	0.343	0.559	0	0
CCNL1	0	-0.339086	0.416	0.608	0	0
ANKRD10	0	-0.341426	0.419	0.597	0	0
MIR137HG	0	-0.34168	0.128	0.381	0	0
ZZEF1	0	-0.34352	0.393	0.584	0	0
RUNX2	0	-0.345594	0.246	0.495	0	0
ZNF654	0	-0.34595	0.41	0.586	0	0
TVP23C	0	-0.346543	0.335	0.538	0	0
EYA3	0	-0.346697	0.504	0.638	0	0
KIAA1328	0	-0.347141	0.195	0.456	0	0
OPHN1	0	-0.348839	0.239	0.477	0	0
AC083870.1	0	-0.348874	0.147	0.461	0	0
HMGA2-AS1	0	-0.349256	0.152	0.419	0	0
SRSF11	0	-0.349917	0.961	0.881	0	0
CNTLN	0	-0.350593	0.354	0.553	0	0
ZFR	0	-0.35169	0.893	0.853	0	0
AKAP10	0	-0.351699	0.406	0.598	0	0
AL356124.1	0	-0.352201	0.086	0.308	0	0
NUP98	0	-0.354704	0.551	0.665	0	0
SCAPER	0	-0.360048	0.318	0.539	0	0
NAA25	0	-0.360396	0.555	0.665	0	0
SNX14	0	-0.360986	0.728	0.746	0	0
THOC2	0	-0.361027	0.759	0.767	0	0
SMG1	0	-0.361358	0.625	0.701	0	0
ETNK1	0	-0.361847	0.563	0.676	0	0
ARMH3	0	-0.364023	0.396	0.592	0	0
XRN1	0	-0.364035	0.666	0.727	0	0
RLF	0	-0.36416	0.442	0.643	0	0
TFB1M	0	-0.36469	0.431	0.61	0	0
MAPK14	0	-0.365195	0.595	0.674	0	0
SPG11	0	-0.365291	0.527	0.666	0	0
MAP2K4	0	-0.36551	0.671	0.717	0	0
PCED1B	0	-0.366163	0.197	0.427	0	0
SCLT1	0	-0.36687	0.241	0.491	0	0
CENPP	0	-0.367748	0.13	0.361	0	0
BMP2K	0	-0.367929	0.489	0.614	0	0
FAM13A	0	-0.367967	0.467	0.607	0	0
SP3	0	-0.368279	0.652	0.717	0	0
CDK8	0	-0.369098	0.368	0.574	0	0
MTMR3	0	-0.369901	0.414	0.594	0	0
MAGI3	0	-0.370133	0.243	0.494	0	0
RBM33	0	-0.370582	0.503	0.657	0	0
ACIN1	0	-0.37107	0.714	0.755	0	0
CBL	0	-0.371132	0.65	0.708	0	0
SLTM	0	-0.371843	0.873	0.841	0	0
HIVEP2	0	-0.371994	0.331	0.535	0	0
OSBPL9	0	-0.372248	0.664	0.725	0	0
PI4KA	0	-0.372631	0.569	0.669	0	0
MCPH1	0	-0.372738	0.411	0.584	0	0
JPX	0	-0.374376	0.904	0.858	0	0
GON4L	0	-0.37503	0.611	0.7	0	0
CEP192	0	-0.375513	0.242	0.532	0	0
ARHGEF10	0	-0.376207	0.482	0.629	0	0
ZNF644	0	-0.37645	0.755	0.757	0	0
TTC7A	0	-0.378077	0.364	0.551	0	0
CDC42SE2	0	-0.37861	0.601	0.685	0	0
PCM1	0	-0.3798	0.8	0.796	0	0
PITPNB	0	-0.379862	0.769	0.768	0	0
ATR	0	-0.380029	0.382	0.603	0	0
TRAF3IP2-AS1	0	-0.380478	0.291	0.528	0	0
RNF111	0	-0.380647	0.554	0.676	0	0
FCHO2	0	-0.381159	0.375	0.595	0	0
RPAP2	0	-0.382462	0.511	0.659	0	0
RPRD2	0	-0.383084	0.541	0.663	0	0
ARHGAP12	0	-0.384746	0.525	0.648	0	0
SOS2	0	-0.386002	0.538	0.662	0	0
NHS	0	-0.386605	0.189	0.431	0	0
ARFGEF2	0	-0.386663	0.535	0.667	0	0
POGZ	0	-0.387407	0.556	0.671	0	0
ANKHD1	0	-0.387523	0.564	0.695	0	0
NCOA6	0	-0.387967	0.464	0.643	0	0
MIPOL1	0	-0.388001	0.224	0.5	0	0
BAZ1A	0	-0.389422	0.704	0.745	0	0
LUC7L3	0	-0.389789	0.862	0.83	0	0
USP33	0	-0.389839	0.704	0.748	0	0
TRIM33	0	-0.390618	0.492	0.662	0	0
RAF1	0	-0.390678	0.639	0.715	0	0
MAST2	0	-0.391597	0.387	0.593	0	0
FAM49B	0	-0.391934	0.666	0.714	0	0
LCORL	0	-0.392726	0.286	0.541	0	0
ASB3	0	-0.392798	0.57	0.684	0	0
ARGLU1	0	-0.393014	0.845	0.802	0	0
INO80	0	-0.39422	0.524	0.665	0	0
VPS54	0	-0.394453	0.416	0.605	0	0
MED27	0	-0.394835	0.591	0.697	0	0
CHCHD3	0	-0.395052	0.811	0.793	0	0
EXOC6	0	-0.395759	0.436	0.586	0	0
ZFX	0	-0.395926	0.651	0.719	0	0
UIMC1	0	-0.396101	0.47	0.657	0	0
NFATC3	0	-0.396102	0.341	0.584	0	0
PBRM1	0	-0.396484	0.828	0.802	0	0
TUT4	0	-0.396509	0.661	0.726	0	0
WRN	0	-0.396738	0.443	0.624	0	0
WDPCP	0	-0.397159	0.236	0.516	0	0
MT-ND4L	0	-0.397666	0.5	0.684	0	0
XKR6	0	-0.397807	0.296	0.511	0	0
ATF7IP	0	-0.397962	0.518	0.643	0	0
BDNF-AS	0	-0.398182	0.175	0.49	0	0
GTDC1	0	-0.398244	0.307	0.507	0	0
ADNP	0	-0.398675	0.709	0.751	0	0
DENND5B	0	-0.399695	0.374	0.545	0	0
FAM193A	0	-0.39978	0.44	0.629	0	0
AHRR	0	-0.399994	0.3	0.529	0	0
RNGTT	0	-0.400765	0.455	0.632	0	0
USP24	0	-0.400774	0.45	0.639	0	0
ULK4	0	-0.402151	0.33	0.527	0	0
DNAH14	0	-0.402242	0.315	0.509	0	0
DYNC2H1	0	-0.403301	0.443	0.621	0	0
FAM120B	0	-0.405048	0.534	0.654	0	0
MTAP	0	-0.405086	0.607	0.69	0	0
SPECC1L	0	-0.405426	0.558	0.673	0	0
RABGAP1	0	-0.405579	0.761	0.769	0	0
SAMD3	0	-0.406243	0.132	0.358	0	0
KIF9-AS1	0	-0.406334	0.268	0.55	0	0
LRCH1	0	-0.40708	0.364	0.594	0	0
THADA	0	-0.40735	0.348	0.593	0	0
RBM25	0	-0.407596	0.854	0.832	0	0
GATAD2B	0	-0.409211	0.452	0.629	0	0
ZNF721	0	-0.410105	0.625	0.696	0	0
EPC1	0	-0.410443	0.703	0.75	0	0
ASXL1	0	-0.411219	0.738	0.768	0	0
CCDC88A	0	-0.411275	0.65	0.71	0	0
LIMD1	0	-0.411618	0.431	0.598	0	0
CPLANE1	0	-0.411709	0.499	0.645	0	0
PUM1	0	-0.411747	0.88	0.818	0	0
AF117829.1	0	-0.411858	0.192	0.467	0	0
KIRREL1	0	-0.413046	0.604	0.685	0	0
GAB2	0	-0.413171	0.257	0.493	0	0
MAP2K5	0	-0.413178	0.347	0.571	0	0
ATP9B	0	-0.41326	0.272	0.575	0	0
SPIN1	0	-0.413702	0.78	0.782	0	0
ADAMTSL4-AS1	0	-0.413833	0.202	0.495	0	0
WDR7	0	-0.413882	0.342	0.587	0	0
KLHL29	0	-0.414327	0.239	0.467	0	0
VPS13A	0	-0.414332	0.458	0.636	0	0
KAT6A	0	-0.415356	0.571	0.702	0	0
USP47	0	-0.41538	0.858	0.811	0	0
C15orf41	0	-0.415661	0.321	0.561	0	0
FAM222B	0	-0.416427	0.665	0.711	0	0
GAB1	0	-0.416892	0.295	0.525	0	0
PDS5B	0	-0.417282	0.529	0.66	0	0
HERC1	0	-0.41752	0.664	0.709	0	0
SEPTIN7	0	-0.417879	0.984	0.963	0	0
SEC24B	0	-0.419266	0.623	0.709	0	0
RB1	0	-0.421002	0.708	0.749	0	0
SHLD2	0	-0.421372	0.602	0.698	0	0
PSPC1	0	-0.421418	0.506	0.665	0	0
VPS8	0	-0.421721	0.525	0.669	0	0
NCOR1	0	-0.422837	0.906	0.837	0	0
TAF3	0	-0.424479	0.548	0.683	0	0
CEP112	0	-0.424758	0.281	0.517	0	0
DIS3L2	0	-0.4248	0.312	0.596	0	0
AC104123.1	0	-0.425109	0.16	0.401	0	0
AC006001.2	0	-0.425118	0.302	0.551	0	0
HIBCH	0	-0.425757	0.606	0.723	0	0
DENND4C	0	-0.426033	0.422	0.637	0	0
BPTF	0	-0.427555	0.895	0.835	0	0
ECPAS	0	-0.427937	0.62	0.7	0	0
FBXO42	0	-0.427984	0.46	0.648	0	0
RNF38	0	-0.428842	0.454	0.633	0	0
LINC01473	0	-0.429015	0.133	0.452	0	0
C11orf49	0	-0.429737	0.527	0.677	0	0
SPRED2	0	-0.43113	0.505	0.631	0	0
HELZ	0	-0.431312	0.688	0.729	0	0
ELF2	0	-0.431511	0.606	0.704	0	0
SCAF8	0	-0.432216	0.577	0.695	0	0
FBXW8	0	-0.433827	0.357	0.602	0	0
NFX1	0	-0.433834	0.527	0.68	0	0
CTBP2	0	-0.434103	0.822	0.79	0	0
TMEM135	0	-0.434344	0.339	0.577	0	0
AC009264.1	0	-0.435993	0.125	0.442	0	0
SPATA13	0	-0.436055	0.377	0.562	0	0
ATAD2B	0	-0.436367	0.257	0.579	0	0
SNX9	0	-0.436472	0.742	0.761	0	0
SATB2	0	-0.436593	0.354	0.545	0	0
UBAP2	0	-0.437107	0.668	0.717	0	0
CELF1	0	-0.437615	0.896	0.84	0	0
MARCH7	0	-0.437748	0.819	0.799	0	0
FBXL2	0	-0.438544	0.395	0.581	0	0
ITFG1	0	-0.438613	0.863	0.817	0	0
TRAPPC9	0	-0.438747	0.316	0.567	0	0
LUC7L2	0	-0.438968	0.856	0.828	0	0
FUT8	0	-0.439166	0.534	0.654	0	0
KHDRBS1	0	-0.439468	0.943	0.874	0	0
LSM14A	0	-0.439655	0.82	0.798	0	0
FAM168A	0	-0.439659	0.482	0.649	0	0
RPTOR	0	-0.440025	0.404	0.627	0	0
ATXN10	0	-0.440166	0.941	0.888	0	0
CLEC16A	0	-0.441394	0.411	0.628	0	0
GOLGA4	0	-0.442131	0.914	0.858	0	0
FOXJ3	0	-0.442197	0.481	0.67	0	0
DPH6	0	-0.442874	0.32	0.544	0	0
PUM3	0	-0.443201	0.667	0.736	0	0
TIAM2	0	-0.443849	0.306	0.579	0	0
PAFAH1B1	0	-0.443864	0.922	0.848	0	0
UVRAG	0	-0.444149	0.523	0.679	0	0
AMBRA1	0	-0.444521	0.478	0.677	0	0
FRYL	0	-0.444622	0.614	0.708	0	0
PRH1	0	-0.444732	0.182	0.532	0	0
XPR1	0	-0.445646	0.589	0.687	0	0
HMBOX1	0	-0.445701	0.348	0.599	0	0
ZRANB2	0	-0.44672	0.855	0.826	0	0
SGMS1	0	-0.446972	0.583	0.686	0	0
BRWD1	0	-0.447339	0.66	0.714	0	0
KMT2E	0	-0.448374	0.856	0.819	0	0
ZFC3H1	0	-0.448398	0.619	0.704	0	0
FBXL20	0	-0.449097	0.404	0.58	0	0
MED13	0	-0.451297	0.709	0.752	0	0
KLF7	0	-0.451828	0.476	0.612	0	0
TET2	0	-0.452329	0.262	0.582	0	0
MAPKAP1	0	-0.452438	0.828	0.81	0	0
PPP1R12B	0	-0.453278	0.31	0.578	0	0
PKD2	0	-0.453417	0.727	0.759	0	0
KDM4C	0	-0.45375	0.283	0.562	0	0
PNN	0	-0.455477	0.668	0.754	0	0
PDSS2	0	-0.455976	0.508	0.663	0	0
DNMBP	0	-0.457127	0.486	0.617	0	0
GPR173	0	-0.460101	0.253	0.522	0	0
BABAM2	0	-0.460276	0.613	0.694	0	0
ZEB2	0	-0.460531	0.734	0.755	0	0
RC3H1	0	-0.462555	0.675	0.74	0	0
CLASP2	0	-0.46349	0.46	0.65	0	0
VPS13D	0	-0.465197	0.519	0.667	0	0
UBE4B	0	-0.465745	0.636	0.717	0	0
NR2F2-AS1	0	-0.465805	0.335	0.544	0	0
NRF1	0	-0.466459	0.254	0.571	0	0
ZNF521	0	-0.467594	0.543	0.642	0	0
CUL3	0	-0.468252	0.847	0.812	0	0
CAB39	0	-0.468836	0.742	0.756	0	0
TFCP2	0	-0.469094	0.473	0.651	0	0
PPP6R2	0	-0.470346	0.783	0.788	0	0
OLA1	0	-0.470503	0.837	0.829	0	0
PKN2	0	-0.471696	0.832	0.801	0	0
CAMSAP2	0	-0.471947	0.752	0.765	0	0
NRIP1	0	-0.472715	0.649	0.714	0	0
SLC39A11	0	-0.472826	0.52	0.629	0	0
AVL9	0	-0.473656	0.479	0.66	0	0
XRCC5	0	-0.473774	0.964	0.905	0	0
FRS2	0	-0.473932	0.617	0.729	0	0
VPS53	0	-0.47558	0.704	0.737	0	0
GIGYF2	0	-0.476537	0.697	0.759	0	0
INTS6	0	-0.476655	0.546	0.668	0	0
NR3C1	0	-0.476888	0.873	0.813	0	0
MICU1	0	-0.477736	0.872	0.838	0	0
RREB1	0	-0.478499	0.454	0.665	0	0
GALK2	0	-0.479297	0.332	0.613	0	0
PPFIBP1	0	-0.480327	0.779	0.787	0	0
AFF4	0	-0.480593	0.863	0.822	0	0
SMCHD1	0	-0.480707	0.801	0.796	0	0
TNRC6A	0	-0.480903	0.923	0.845	0	0
MIR34AHG	0	-0.48134	0.17	0.512	0	0
CREBBP	0	-0.481686	0.657	0.745	0	0
PMM2	0	-0.482456	0.528	0.694	0	0
SUPT3H	0	-0.482877	0.324	0.596	0	0
PTPRJ	0	-0.483644	0.344	0.587	0	0
RUSC2	0	-0.484185	0.568	0.666	0	0
FAM172A	0	-0.485163	0.714	0.741	0	0
WAC	0	-0.485392	0.888	0.827	0	0
FAM13B	0	-0.486931	0.621	0.728	0	0
TBCK	0	-0.487501	0.491	0.654	0	0
DISC1	0	-0.487902	0.267	0.525	0	0
USP15	0	-0.48875	0.681	0.774	0	0
UBR2	0	-0.492542	0.617	0.731	0	0
DPF3	0	-0.492592	0.26	0.475	0	0
AC118549.1	0	-0.495089	0.671	0.737	0	0
PPP2R3A	0	-0.495666	0.55	0.688	0	0
UBR4	0	-0.496124	0.614	0.726	0	0
R3HDM1	0	-0.496512	0.592	0.715	0	0
LARGE1	0	-0.497023	0.309	0.491	0	0
PPP3R1	0	-0.497102	0.616	0.721	0	0
PSME4	0	-0.497423	0.809	0.791	0	0
LINC01004	0	-0.49892	0.205	0.553	0	0
ZNF83	0	-0.499316	0.556	0.713	0	0
NSD1	0	-0.500449	0.644	0.75	0	0
ARID2	0	-0.501677	0.393	0.656	0	0
AP3B1	0	-0.5023	0.835	0.814	0	0
MYO9B	0	-0.502527	0.732	0.759	0	0
LCOR	0	-0.502606	0.649	0.729	0	0
AHCYL2	0	-0.503599	0.291	0.551	0	0
YEATS2	0	-0.505372	0.47	0.671	0	0
NCOA1	0	-0.506394	0.506	0.671	0	0
UBR1	0	-0.506619	0.598	0.735	0	0
STRN3	0	-0.50674	0.823	0.801	0	0
TCF7L1	0	-0.507263	0.573	0.679	0	0
RASA2	0	-0.507675	0.575	0.702	0	0
DYM	0	-0.508061	0.54	0.687	0	0
ZMYM4	0	-0.509377	0.732	0.774	0	0
CCDC91	0	-0.509496	0.648	0.719	0	0
SPATA5	0	-0.509663	0.249	0.558	0	0
R3HDM2	0	-0.509942	0.749	0.783	0	0
PDS5A	0	-0.510115	0.755	0.778	0	0
TCF7L2	0	-0.510942	0.606	0.713	0	0
SUCLG2	0	-0.510964	0.72	0.771	0	0
PRKCE	0	-0.511141	0.55	0.676	0	0
AC119673.2	0	-0.511336	0.197	0.551	0	0
ANO10	0	-0.513316	0.841	0.81	0	0
PHACTR4	0	-0.513425	0.684	0.757	0	0
DIP2B	0	-0.513661	0.451	0.677	0	0
EML4	0	-0.514035	0.697	0.749	0	0
DDX17	0	-0.514362	0.934	0.855	0	0
WSB1	0	-0.515864	0.801	0.792	0	0
NKTR	0	-0.517935	0.599	0.738	0	0
KCNQ1OT1	0	-0.51959	0.131	0.507	0	0
GMDS	0	-0.520764	0.488	0.647	0	0
SLC16A1-AS1	0	-0.520835	0.368	0.643	0	0
PTEN	0	-0.521807	0.884	0.832	0	0
DENND1A	0	-0.521978	0.333	0.613	0	0
RAP1GDS1	0	-0.522342	0.832	0.818	0	0
WDR70	0	-0.523988	0.572	0.722	0	0
SENP6	0	-0.524985	0.816	0.803	0	0
DLG2	0	-0.525771	0.171	0.397	0	0
RBM26	0	-0.526396	0.744	0.774	0	0
CBLB	0	-0.528777	0.343	0.579	0	0
DENND4A	0	-0.530139	0.521	0.651	0	0
CDC14B	0	-0.530461	0.6	0.693	0	0
AC008014.1	0	-0.530991	0.336	0.509	0	0
CSPP1	0	-0.531345	0.471	0.665	0	0
BCAR3	0	-0.531607	0.543	0.666	0	0
PIAS1	0	-0.531621	0.671	0.755	0	0
RALGAPA1	0	-0.531779	0.403	0.663	0	0
KALRN	0	-0.53228	0.26	0.459	0	0
NR2F1-AS1	0	-0.535308	0.727	0.744	0	0
ARID4B	0	-0.535517	0.82	0.811	0	0
PICALM	0	-0.535559	0.912	0.853	0	0
RICTOR	0	-0.535772	0.52	0.706	0	0
TMCC1	0	-0.537684	0.435	0.65	0	0
UST	0	-0.538019	0.463	0.643	0	0
TNKS	0	-0.538451	0.589	0.715	0	0
CBFA2T2	0	-0.539969	0.349	0.638	0	0
MT-ND6	0	-0.54017	0.338	0.646	0	0
ZNF148	0	-0.540619	0.861	0.817	0	0
BAZ2B	0	-0.540748	0.517	0.675	0	0
BMPR2	0	-0.540795	0.888	0.827	0	0
LINC00513	0	-0.540863	0.456	0.688	0	0
ITSN1	0	-0.542494	0.586	0.714	0	0
TRPM7	0	-0.543489	0.629	0.74	0	0
LARP4B	0	-0.544117	0.639	0.741	0	0
GPHN	0	-0.545074	0.234	0.565	0	0
FAM126A	0	-0.545364	0.809	0.775	0	0
MYO9A	0	-0.547231	0.593	0.717	0	0
GPATCH2	0	-0.547567	0.514	0.699	0	0
SPIRE1	0	-0.549078	0.61	0.73	0	0
SIK2	0	-0.549446	0.488	0.672	0	0
ZFHX3	0	-0.549849	0.782	0.776	0	0
PIP5K1A	0	-0.551787	0.663	0.746	0	0
WWC2	0	-0.552714	0.776	0.771	0	0
GNAQ	0	-0.552874	0.889	0.828	0	0
KDM2A	0	-0.552936	0.692	0.768	0	0
WDFY2	0	-0.553855	0.53	0.697	0	0
MLLT3	0	-0.555425	0.491	0.647	0	0
STK39	0	-0.55692	0.655	0.723	0	0
FARS2	0	-0.55695	0.425	0.677	0	0
TBL1X	0	-0.557382	0.703	0.736	0	0
NIPBL	0	-0.557538	0.73	0.785	0	0
GBF1	0	-0.557654	0.813	0.795	0	0
MAPK10	0	-0.558026	0.277	0.511	0	0
TASOR2	0	-0.558784	0.685	0.762	0	0
PDE8A	0	-0.561384	0.509	0.7	0	0
AGO3	0	-0.561651	0.529	0.719	0	0
SCN8A	0	-0.563943	0.359	0.583	0	0
PNISR	0	-0.564695	0.707	0.793	0	0
PHC3	0	-0.565445	0.615	0.745	0	0
HECTD4	0	-0.566484	0.503	0.708	0	0
PITPNC1	0	-0.566518	0.382	0.581	0	0
ST5	0	-0.567599	0.665	0.733	0	0
GULP1	0	-0.567674	0.56	0.685	0	0
PCNX4	0	-0.569154	0.756	0.778	0	0
RAPGEF6	0	-0.569165	0.386	0.664	0	0
ST3GAL3	0	-0.569918	0.366	0.647	0	0
RPS6KC1	0	-0.570056	0.579	0.708	0	0
PDE7B	0	-0.570997	0.312	0.541	0	0
FOCAD	0	-0.571124	0.553	0.682	0	0
TENT2	0	-0.571265	0.526	0.72	0	0
DOCK5	0	-0.57165	0.561	0.696	0	0
SRSF4	0	-0.571748	0.844	0.828	0	0
ZNF292	0	-0.57242	0.612	0.753	0	0
RSRP1	0	-0.574447	0.502	0.697	0	0
LRBA	0	-0.574598	0.465	0.648	0	0
CHD2	0	-0.575363	0.79	0.791	0	0
MCU	0	-0.575834	0.542	0.707	0	0
CASC15	0	-0.57609	0.245	0.483	0	0
TLK1	0	-0.577439	0.815	0.8	0	0
MYOF	0	-0.577929	0.97	0.895	0	0
POLR2J3	0	-0.577955	0.397	0.706	0	0
CDK13	0	-0.580576	0.64	0.745	0	0
SLMAP	0	-0.581463	0.63	0.747	0	0
CCNY	0	-0.582283	0.841	0.823	0	0
FNDC3A	0	-0.582929	0.774	0.808	0	0
MNAT1	0	-0.582959	0.845	0.831	0	0
ARIH1	0	-0.583252	0.788	0.8	0	0
PUM2	0	-0.583319	0.702	0.778	0	0
TRA2A	0	-0.583667	0.791	0.82	0	0
DYRK1A	0	-0.58445	0.474	0.703	0	0
NHSL1	0	-0.584799	0.265	0.541	0	0
PIBF1	0	-0.586791	0.396	0.678	0	0
AFF1	0	-0.587715	0.559	0.684	0	0
ANKRD28	0	-0.587908	0.788	0.789	0	0
PTPN14	0	-0.588331	0.882	0.821	0	0
IQCJ-SCHIP1	0	-0.588775	0.209	0.551	0	0
ARFGEF1	0	-0.588812	0.699	0.775	0	0
ARHGEF12	0	-0.589065	0.854	0.82	0	0
SMC5	0	-0.5897	0.603	0.752	0	0
MON2	0	-0.589804	0.611	0.734	0	0
JARID2	0	-0.589978	0.547	0.686	0	0
CSNK1G1	0	-0.591599	0.604	0.737	0	0
PPP3CA	0	-0.592022	0.916	0.857	0	0
ANKIB1	0	-0.592673	0.795	0.795	0	0
RIMS2	0	-0.592811	0.188	0.461	0	0
TBC1D22A	0	-0.593269	0.616	0.737	0	0
VWA8	0	-0.59503	0.41	0.673	0	0
FOXO3	0	-0.595301	0.815	0.781	0	0
FBXL17	0	-0.596275	0.517	0.654	0	0
SCFD1	0	-0.596978	0.843	0.84	0	0
EHMT1	0	-0.598398	0.632	0.756	0	0
AC092691.1	0	-0.598618	0.135	0.39	0	0
TMEM117	0	-0.600212	0.375	0.635	0	0
CDK17	0	-0.600535	0.594	0.71	0	0
HDAC8	0	-0.601177	0.454	0.682	0	0
SMURF1	0	-0.601838	0.535	0.709	0	0
BTRC	0	-0.602337	0.583	0.699	0	0
DGKH	0	-0.602749	0.444	0.661	0	0
PACS1	0	-0.602866	0.736	0.773	0	0
FNBP4	0	-0.604193	0.628	0.776	0	0
UGGT2	0	-0.604745	0.508	0.715	0	0
CEP85L	0	-0.606394	0.42	0.651	0	0
SMG6	0	-0.608798	0.65	0.758	0	0
LRCH3	0	-0.609106	0.568	0.744	0	0
PDGFC	0	-0.610422	0.759	0.768	0	0
ANKRD12	0	-0.611464	0.81	0.807	0	0
LINC00472	0	-0.614826	0.2	0.537	0	0
PPARG	0	-0.617187	0.609	0.699	0	0
AOPEP	0	-0.617224	0.777	0.792	0	0
ETV6	0	-0.617311	0.48	0.683	0	0
BBS9	0	-0.617375	0.376	0.595	0	0
PCNX1	0	-0.617933	0.646	0.744	0	0
NSD2	0	-0.618857	0.376	0.609	0	0
NBAS	0	-0.619282	0.656	0.753	0	0
YAP1	0	-0.621589	0.894	0.853	0	0
BMPR1A	0	-0.621616	0.6	0.744	0	0
COG5	0	-0.622052	0.602	0.739	0	0
RIC1	0	-0.622067	0.654	0.747	0	0
WDFY3	0	-0.624179	0.586	0.738	0	0
GSK3B	0	-0.6248	0.805	0.799	0	0
RAPGEF2	0	-0.627197	0.65	0.742	0	0
FRMD4A	0	-0.630623	0.555	0.7	0	0
ACBD6	0	-0.632248	0.81	0.82	0	0
FBXO11	0	-0.632435	0.731	0.788	0	0
MSC-AS1	0	-0.632453	0.575	0.691	0	0
KAT6B	0	-0.632608	0.711	0.771	0	0
UBR3	0	-0.633486	0.676	0.75	0	0
AC016831.7	0	-0.634889	0.335	0.633	0	0
TTC17	0	-0.636035	0.688	0.771	0	0
PPP1R12A	0	-0.637335	0.871	0.837	0	0
CDKAL1	0	-0.63935	0.381	0.687	0	0
SSBP2	0	-0.639456	0.518	0.676	0	0
STK3	0	-0.640091	0.49	0.725	0	0
ABL1	0	-0.64146	0.662	0.754	0	0
SNX29	0	-0.642407	0.591	0.706	0	0
PPP6R3	0	-0.644314	0.682	0.785	0	0
ATXN7L1	0	-0.644512	0.47	0.669	0	0
TRERF1	0	-0.645025	0.472	0.699	0	0
AEBP2	0	-0.645874	0.558	0.662	0	0
MEF2A	0	-0.64592	0.752	0.791	0	0
SOS1	0	-0.647489	0.681	0.762	0	0
TAOK3	0	-0.648497	0.924	0.84	0	0
ITCH	0	-0.648497	0.716	0.799	0	0
RUFY3	0	-0.649832	0.551	0.731	0	0
SCMH1	0	-0.650616	0.458	0.705	0	0
RBFOX2	0	-0.652205	0.947	0.888	0	0
NT5C2	0	-0.65331	0.757	0.787	0	0
CTIF	0	-0.653822	0.652	0.728	0	0
TOX	0	-0.654344	0.245	0.453	0	0
ZNF638	0	-0.655994	0.698	0.79	0	0
ROBO1	0	-0.656539	0.645	0.726	0	0
MAPK8	0	-0.657799	0.588	0.731	0	0
USP32	0	-0.658507	0.544	0.738	0	0
C20orf194	0	-0.658577	0.557	0.718	0	0
SETD2	0	-0.662497	0.64	0.779	0	0
PKP4	0	-0.662783	0.553	0.69	0	0
CCDC14	0	-0.663773	0.617	0.717	0	0
PHF21A	0	-0.664003	0.489	0.681	0	0
SPRY4-AS1	0	-0.664651	0.384	0.585	0	0
ARHGAP24	0	-0.665716	0.48	0.617	0	0
KDM6A	0	-0.665867	0.428	0.703	0	0
TBL1XR1	0	-0.66656	0.874	0.826	0	0
FMNL2	0	-0.668742	0.466	0.666	0	0
MEIS2	0	-0.670575	0.572	0.681	0	0
SND1	0	-0.67076	0.902	0.847	0	0
COP1	0	-0.671375	0.618	0.747	0	0
USP34	0	-0.671605	0.862	0.832	0	0
HIP1	0	-0.671998	0.71	0.743	0	0
FBXW7	0	-0.672348	0.59	0.743	0	0
GLI2	0	-0.672364	0.522	0.707	0	0
OSBPL3	0	-0.673785	0.605	0.721	0	0
TCF4	0	-0.676351	0.777	0.791	0	0
FUS	0	-0.680055	0.77	0.822	0	0
CDC42BPA	0	-0.681259	0.771	0.795	0	0
SDCCAG8	0	-0.683113	0.785	0.782	0	0
NCOA2	0	-0.683165	0.547	0.714	0	0
CAMKMT	0	-0.683595	0.437	0.637	0	0
UBE2E2	0	-0.684543	0.787	0.775	0	0
ACACA	0	-0.686297	0.585	0.749	0	0
GBE1	0	-0.689576	0.852	0.831	0	0
ZMYM2	0	-0.689761	0.633	0.75	0	0
INVS	0	-0.690552	0.362	0.68	0	0
FTO	0	-0.690841	0.637	0.756	0	0
ARHGAP10	0	-0.691054	0.81	0.801	0	0
MAP4K4	0	-0.691848	0.957	0.903	0	0
ABCC1	0	-0.694237	0.758	0.77	0	0
HS3ST3A1	0	-0.698113	0.523	0.684	0	0
DCLK2	0	-0.698359	0.289	0.583	0	0
SYNE1	0	-0.698887	0.7	0.755	0	0
IGF2BP3	0	-0.699353	0.902	0.85	0	0
DLG1	0	-0.702411	0.602	0.76	0	0
FER	0	-0.703882	0.491	0.725	0	0
NEGR1	0	-0.705057	0.463	0.615	0	0
HSP90AB1	0	-0.706762	0.994	0.941	0	0
TRPS1	0	-0.708572	0.518	0.685	0	0
ADAMTS6	0	-0.709656	0.264	0.488	0	0
BRAF	0	-0.710656	0.515	0.742	0	0
RBPMS	0	-0.711945	0.924	0.845	0	0
MIR181A1HG	0	-0.713738	0.221	0.597	0	0
MCC	0	-0.716269	0.618	0.682	0	0
RASGRF2	0	-0.716376	0.601	0.718	0	0
PRICKLE2	0	-0.717306	0.538	0.676	0	0
PTBP2	0	-0.717597	0.355	0.714	0	0
MLLT10	0	-0.720904	0.551	0.753	0	0
NEDD4	0	-0.722048	0.792	0.807	0	0
KMT2C	0	-0.724014	0.712	0.79	0	0
MARK3	0	-0.725052	0.767	0.8	0	0
ASCC3	0	-0.725085	0.923	0.866	0	0
PBX3	0	-0.728208	0.473	0.679	0	0
MT-ND5	0	-0.728851	0.762	0.909	0	0
STXBP5	0	-0.732305	0.641	0.747	0	0
TANC1	0	-0.732342	0.674	0.757	0	0
TAF15	0	-0.732366	0.767	0.835	0	0
ASH1L	0	-0.734684	0.847	0.831	0	0
METTL15	0	-0.735589	0.531	0.741	0	0
PAN3	0	-0.737622	0.421	0.729	0	0
TRHDE	0	-0.738126	0.867	0.815	0	0
MAML3	0	-0.738686	0.304	0.549	0	0
PCNX2	0	-0.742456	0.513	0.72	0	0
CUX1	0	-0.742857	0.838	0.834	0	0
CPED1	0	-0.743465	0.893	0.834	0	0
ZNF407	0	-0.743971	0.329	0.681	0	0
MAP3K5	0	-0.745573	0.786	0.767	0	0
BACH1	0	-0.746048	0.719	0.78	0	0
EGFR	0	-0.7464	0.889	0.819	0	0
DLEU2	0	-0.748087	0.256	0.616	0	0
TPST1	0	-0.750398	0.799	0.789	0	0
RABGEF1	0	-0.751655	0.857	0.842	0	0
PRIM2	0	-0.752022	0.584	0.695	0	0
MTHFD1L	0	-0.753509	0.869	0.841	0	0
DIP2C	0	-0.75644	0.692	0.771	0	0
UBR5	0	-0.757287	0.811	0.819	0	0
NLGN1	0	-0.757898	0.242	0.505	0	0
GPATCH8	0	-0.760862	0.665	0.798	0	0
INPP4B	0	-0.761355	0.457	0.666	0	0
DOCK1	0	-0.762335	0.785	0.802	0	0
FNIP1	0	-0.76276	0.709	0.8	0	0
ATXN2	0	-0.762835	0.836	0.822	0	0
DIAPH2	0	-0.763126	0.638	0.727	0	0
CHD9	0	-0.766971	0.89	0.846	0	0
CLASP1	0	-0.767642	0.663	0.77	0	0
EPB41L2	0	-0.768666	0.901	0.855	0	0
FOXN3	0	-0.772858	0.848	0.82	0	0
PDE4B	0	-0.777274	0.24	0.525	0	0
RBM6	0	-0.777692	0.617	0.786	0	0
SH3RF1	0	-0.778588	0.766	0.755	0	0
PLEKHA5	0	-0.781635	0.596	0.748	0	0
TBC1D5	0	-0.782904	0.679	0.776	0	0
MT-CO1	0	-0.783206	0.948	0.985	0	0
SETD5	0	-0.784162	0.739	0.815	0	0
MYO10	0	-0.793494	0.912	0.826	0	0
RFX7	0	-0.795202	0.438	0.713	0	0
RABGAP1L	0	-0.796363	0.458	0.705	0	0
UTRN	0	-0.796773	0.751	0.792	0	0
ERBIN	0	-0.799443	0.86	0.838	0	0
AKAP13	0	-0.801234	0.667	0.794	0	0
MT-CYB	0	-0.801409	0.915	0.979	0	0
ARL15	0	-0.801591	0.429	0.678	0	0
SIK3	0	-0.802088	0.558	0.759	0	0
FRMD5	0	-0.805254	0.302	0.558	0	0
SEMA3A	0	-0.807827	0.84	0.795	0	0
TENM3	0	-0.808519	0.558	0.705	0	0
SIPA1L3	0	-0.809242	0.613	0.731	0	0
SRPK2	0	-0.813572	0.842	0.841	0	0
DOCK10	0	-0.8137	0.45	0.666	0	0
VTI1A	0	-0.818236	0.522	0.754	0	0
CDK14	0	-0.819243	0.523	0.742	0	0
LDB2	0	-0.819783	0.519	0.682	0	0
NLK	0	-0.823844	0.504	0.713	0	0
RBMS1	0	-0.825333	0.924	0.845	0	0
SLC8A1	0	-0.827186	0.541	0.642	0	0
GSE1	0	-0.829581	0.653	0.766	0	0
DOCK4	0	-0.831197	0.561	0.692	0	0
EFNA5	0	-0.83168	0.442	0.585	0	0
JAZF1	0	-0.834908	0.662	0.747	0	0
CFAP299	0	-0.837765	0.232	0.538	0	0
FAF1	0	-0.839464	0.565	0.775	0	0
CACNA2D1	0	-0.839879	0.717	0.776	0	0
SPIDR	0	-0.841397	0.491	0.742	0	0
TEAD1	0	-0.841647	0.942	0.871	0	0
FCHSD2	0	-0.842475	0.595	0.763	0	0
NSMCE2	0	-0.845009	0.603	0.797	0	0
IL1RAPL1	0	-0.845682	0.22	0.462	0	0
VMP1	0	-0.848625	0.922	0.87	0	0
SCFD2	0	-0.849237	0.553	0.708	0	0
AKT3	0	-0.851857	0.687	0.797	0	0
MIR31HG	0	-0.851927	0.457	0.62	0	0
AGAP1	0	-0.856419	0.575	0.756	0	0
BIRC6	0	-0.857847	0.889	0.842	0	0
ANKRD17	0	-0.858148	0.857	0.835	0	0
SOX6	0	-0.858202	0.452	0.68	0	0
RAD51B	0	-0.861361	0.321	0.657	0	0
NUMB	0	-0.863576	0.833	0.814	0	0
RUNX1	0	-0.864806	0.797	0.801	0	0
MRTFA	0	-0.867185	0.531	0.774	0	0
IMMP2L	0	-0.867808	0.417	0.664	0	0
PCCA	0	-0.868191	0.372	0.731	0	0
MAP4K3	0	-0.878223	0.778	0.802	0	0
KIF13A	0	-0.880299	0.816	0.829	0	0
MAP4	0	-0.881307	0.961	0.921	0	0
ATG7	0	-0.885376	0.613	0.779	0	0
MKLN1	0	-0.886347	0.817	0.828	0	0
MT-ND4	0	-0.890436	0.921	0.979	0	0
ZNF609	0	-0.892629	0.578	0.776	0	0
BTBD9	0	-0.893832	0.411	0.682	0	0
MT-ND3	0	-0.895087	0.906	0.97	0	0
REV3L	0	-0.900671	0.741	0.812	0	0
ZCCHC7	0	-0.901114	0.716	0.8	0	0
N4BP2L2	0	-0.903094	0.893	0.851	0	0
ERC1	0	-0.906627	0.728	0.814	0	0
KCNQ5	0	-0.91425	0.218	0.45	0	0
FOXP1	0	-0.915075	0.927	0.853	0	0
PEAK1	0	-0.921179	0.783	0.803	0	0
MT-CO3	0	-0.929165	0.938	0.983	0	0
NF1	0	-0.932517	0.831	0.836	0	0
SIPA1L1	0	-0.933632	0.741	0.788	0	0
BCAS3	0	-0.935442	0.505	0.705	0	0
KLF12	0	-0.937619	0.593	0.742	0	0
EYA4	0	-0.937846	0.538	0.747	0	0
SSH2	0	-0.942626	0.781	0.812	0	0
PARD3	0	-0.952751	0.603	0.785	0	0
EHBP1	0	-0.952824	0.77	0.807	0	0
IGF1R	0	-0.953304	0.68	0.789	0	0
ARHGEF28	0	-0.953981	0.637	0.691	0	0
APBB2	0	-0.955415	0.675	0.78	0	0
FNDC3B	0	-0.956424	0.955	0.872	0	0
CAMK2D	0	-0.961796	0.937	0.879	0	0
SH3RF3	0	-0.96338	0.56	0.742	0	0
ADK	0	-0.965222	0.773	0.846	0	0
MACF1	0	-0.96666	0.969	0.883	0	0
NAV2	0	-0.96843	0.44	0.686	0	0
SMAD3	0	-0.969642	0.902	0.816	0	0
IGF2BP2	0	-0.973617	0.898	0.843	0	0
EIF4G3	0	-0.973682	0.92	0.869	0	0
RORA	0	-0.979047	0.544	0.717	0	0
DPYD	0	-0.980187	0.483	0.736	0	0
MIR222HG	0	-0.982063	0.349	0.675	0	0
RERE	0	-0.984969	0.88	0.843	0	0
PTPRM	0	-0.989738	0.614	0.751	0	0
MT-ND2	0	-0.991807	0.793	0.937	0	0
BICD1	0	-0.997808	0.651	0.772	0	0
GLIS3	0	-1.00329	0.494	0.707	0	0
PSD3	0	-1.00398	0.727	0.763	0	0
PRKD1	0	-1.0044	0.555	0.701	0	0
PRR16	0	-1.00554	0.656	0.748	0	0
EXOC4	0	-1.01613	0.619	0.797	0	0
FBXL7	0	-1.0195	0.409	0.722	0	0
CACNA1C	0	-1.02101	0.479	0.72	0	0
DST	0	-1.02276	0.97	0.906	0	0
ATXN1	0	-1.02343	0.647	0.763	0	0
MT-ND1	0	-1.0252	0.812	0.948	0	0
RANBP17	0	-1.02539	0.415	0.76	0	0
ARID1B	0	-1.02697	0.678	0.805	0	0
MEIS1	0	-1.03328	0.626	0.771	0	0
KANSL1	0	-1.04972	0.657	0.822	0	0
RASAL2	0	-1.05248	0.651	0.789	0	0
STAG1	0	-1.06017	0.791	0.836	0	0
SRGAP1	0	-1.06657	0.911	0.838	0	0
TTC28	0	-1.06917	0.601	0.772	0	0
FMN2	0	-1.07531	0.711	0.73	0	0
TANC2	0	-1.08692	0.633	0.772	0	0
MT-ATP6	0	-1.09758	0.921	0.981	0	0
THSD4	0	-1.09774	0.795	0.772	0	0
EXOC6B	0	-1.10441	0.663	0.802	0	0
MBNL1	0	-1.11172	0.958	0.888	0	0
SBF2	0	-1.11441	0.662	0.815	0	0
ZFPM2-AS1	0	-1.1157	0.667	0.787	0	0
MED13L	0	-1.12344	0.781	0.827	0	0
LPP	0	-1.125	0.951	0.873	0	0
PLCB4	0	-1.12854	0.737	0.752	0	0
TCF12	0	-1.1368	0.841	0.848	0	0
AFF3	0	-1.14764	0.686	0.762	0	0
ASAP1	0	-1.14937	0.956	0.863	0	0
PTK2	0	-1.16268	0.843	0.848	0	0
VPS13B	0	-1.17025	0.593	0.802	0	0
JMJD1C	0	-1.18664	0.796	0.841	0	0
NAV3	0	-1.19115	0.817	0.79	0	0
DLC1	0	-1.19609	0.953	0.856	0	0
HERC4	0	-1.20859	0.907	0.863	0	0
PTPRG	0	-1.23839	0.763	0.819	0	0
ZSWIM6	0	-1.24454	0.673	0.806	0	0
ZNF804A	0	-1.24607	0.507	0.709	0	0
CHRM2	0	-1.25543	0.848	0.775	0	0
MBD5	0	-1.26078	0.606	0.795	0	0
PLCB1	0	-1.26435	0.688	0.791	0	0
XIST	0	-1.26499	0.463	0.788	0	0
ZFAND3	0	-1.26799	0.869	0.862	0	0
NAALADL2	0	-1.27604	0.613	0.757	0	0
STARD13	0	-1.28442	0.717	0.809	0	0
ZBTB20	0	-1.28691	0.777	0.817	0	0
MIR100HG	0	-1.29191	0.972	0.901	0	0
MEG3	0	-1.29224	0.851	0.828	0	0
KIRREL3	0	-1.30953	0.521	0.685	0	0
MAGI1	0	-1.32979	0.655	0.781	0	0
PRKCA	0	-1.33242	0.769	0.817	0	0
SAMD4A	0	-1.33369	0.822	0.836	0	0
PARD3B	0	-1.34089	0.612	0.768	0	0
PTPRK	0	-1.35761	0.822	0.842	0	0
NFAT5	0	-1.36083	0.771	0.842	0	0
ZEB1	0	-1.36761	0.911	0.888	0	0
PVT1	0	-1.37109	0.629	0.826	0	0
BNC2	0	-1.3752	0.709	0.804	0	0
SMYD3	0	-1.41278	0.657	0.809	0	0
FMN1	0	-1.41999	0.738	0.749	0	0
NCKAP5	0	-1.50865	0.793	0.79	0	0
RBMS3	0	-1.54077	0.782	0.825	0	0
GPC6	0	-1.57218	0.608	0.781	0	0
FTX	0	-1.62401	0.607	0.824	0	0
MEG8	0	-1.62941	0.633	0.769	0	0
MAML2	0	-1.63037	0.807	0.831	0	0
SOX5	0	-1.67382	0.57	0.781	0	0
SGIP1	0	-1.74648	0.916	0.85	0	0
ZFPM2	0	-1.7605	0.716	0.825	0	0
PRKG1	0	-1.86675	0.657	0.823	0	0
EXT1	0	-2.02167	0.959	0.861	0	0
ROBO2	0	-2.02307	0.548	0.634	0	0
TRIO	0	-2.13374	0.94	0.863	0	0
MAGI2	0	-2.3123	0.714	0.835	0	0
FAM155A	0	-2.41321	0.852	0.802	0	0
NEAT1	0	-2.51102	0.93	0.874	0	0
MALAT1	0	-3.5118	0.947	0.905	0	0
ZNF618	1.05051e-307	-0.336044	0.476	0.606	3.84497e-303	0
RELCH	2.01905e-307	-0.290496	0.421	0.572	7.38991e-303	0
ZNF280D	4.32757e-307	-0.326922	0.562	0.663	1.58393e-302	0
PARP4	7.943e-307	-0.324341	0.543	0.654	2.90722e-302	0
PTPN9	9.30464e-307	-0.343949	0.506	0.622	3.40559e-302	0
QKI	1.10039e-306	-0.454459	0.897	0.829	4.02752e-302	0
DMTF1	7.31972e-306	-0.312365	0.414	0.569	2.67909e-301	0
ILRUN	4.07682e-305	-0.331295	0.553	0.651	1.49216e-300	0
NRDC	4.6352e-305	-0.3821	0.928	0.876	1.69653e-300	0
OTUD7B	5.6617e-305	-0.315355	0.487	0.615	2.07224e-300	0
MICU2	7.86875e-305	-0.33704	0.71	0.744	2.88004e-300	0
RPS7	9.19529e-305	0.298179	0.999	0.968	3.36557e-300	0
TRPC4AP	2.30673e-304	-0.374534	0.726	0.742	8.44288e-300	0
CCDC18-AS1	6.54247e-304	-0.349852	0.322	0.503	2.39461e-299	0
STAT3	1.03905e-303	-0.448731	0.821	0.792	3.80304e-299	0
ADCY9	1.26048e-303	-0.387849	0.405	0.554	4.61349e-299	0
PTBP3	1.59723e-303	-0.379597	0.699	0.731	5.84604e-299	0
DCAF5	1.66452e-303	-0.348656	0.538	0.64	6.0923e-299	0
CRADD	1.90386e-303	-0.373883	0.304	0.483	6.96833e-299	0
SPRED1	1.98966e-303	-0.471518	0.718	0.731	7.28236e-299	0
SLC4A7	2.19458e-303	-0.818916	0.819	0.791	8.03237e-299	0
MCTP2	4.36563e-303	-0.555088	0.298	0.482	1.59786e-298	0
PPM1D	4.98567e-303	-0.387037	0.394	0.555	1.8248e-298	0
LHFPL6	1.75215e-302	-0.614825	0.808	0.771	6.41303e-298	0
TRRAP	1.85756e-302	-0.285389	0.435	0.581	6.79884e-298	0
MYL12A	4.98369e-302	0.277917	0.997	0.95	1.82408e-297	0
COX10-AS1	5.04545e-302	-0.264946	0.206	0.412	1.84668e-297	0
LPAR1	1.83563e-301	-0.762097	0.957	0.868	6.7186e-297	0
MYO1E	8.55891e-301	-0.406316	0.473	0.601	3.13265e-296	0
CYTH3	1.66592e-300	-0.372047	0.479	0.607	6.09745e-296	0
THRAP3	2.80417e-300	-0.350556	0.913	0.848	1.02635e-295	0
KIF1B	2.87716e-300	-0.457274	0.783	0.766	1.05307e-295	0
PLEC	4.34344e-300	0.262191	0.951	0.786	1.58974e-295	0
FAM133B	5.69344e-300	-0.327663	0.75	0.763	2.08386e-295	0
TNFRSF11B	9.07192e-300	0.458153	0.855	0.597	3.32041e-295	0
ENOSF1	9.82799e-300	-0.270438	0.307	0.495	3.59714e-295	0
CSRP1	6.85615e-299	0.283092	0.961	0.82	2.50942e-294	0
VGLL4	4.305e-298	-0.405869	0.72	0.736	1.57567e-293	0
AC007319.1	4.61024e-298	-0.269706	0.132	0.344	1.68739e-293	0
WWOX	8.48718e-298	-0.621688	0.328	0.498	3.10639e-293	0
CTDSPL2	1.32399e-297	-0.269575	0.396	0.557	4.84595e-293	0
RAB32	2.50438e-297	0.259642	0.972	0.818	9.16629e-293	0
NUBPL	3.36206e-297	-0.283791	0.328	0.505	1.23055e-292	0
SMARCAD1	4.46839e-297	-0.291691	0.546	0.649	1.63548e-292	0
WDR20	9.0639e-297	-0.332223	0.541	0.638	3.31748e-292	0
RASA1	1.79218e-296	-0.616896	0.817	0.79	6.55955e-292	0
NLRP1	5.98034e-296	-0.263365	0.242	0.44	2.18886e-291	0
TXNIP	2.14935e-295	0.266801	0.812	0.543	7.86683e-291	0
ANKRD11	6.71947e-295	-0.434534	0.947	0.873	2.45939e-290	0
BCKDHB	3.59001e-294	-0.330527	0.412	0.561	1.31398e-289	0
ZC3H12C	5.03453e-294	-0.270719	0.265	0.457	1.84269e-289	0
PLAT	1.07371e-293	0.34879	0.791	0.543	3.92988e-289	0
RASSF8	1.68254e-293	-0.4693	0.674	0.71	6.15826e-289	0
AUH	3.92055e-293	-0.264887	0.293	0.481	1.43496e-288	0
WDR37	6.64383e-293	-0.31032	0.442	0.578	2.43171e-288	0
CEP350	2.18136e-292	-0.363768	0.745	0.75	7.98398e-288	0
RNF169	9.92773e-292	-0.322861	0.567	0.658	3.63365e-287	0
GMDS-DT	1.00831e-291	-0.469452	0.373	0.523	3.69051e-287	0
WWP2	1.58465e-291	-0.255715	0.345	0.518	5.79999e-287	0
NRP1	1.6328e-291	-0.620335	0.639	0.686	5.97623e-287	0
NEK7	2.8156e-291	-0.467754	0.796	0.805	1.03054e-286	0
PDZRN3	4.23406e-291	-0.542047	0.322	0.494	1.54971e-286	0
MRPS24	7.31019e-291	0.26629	0.989	0.863	2.6756e-286	0
FIP1L1	9.9165e-291	-0.328176	0.681	0.725	3.62954e-286	0
PHLDA1	1.92647e-290	0.32424	0.967	0.79	7.05108e-286	0
HTT	1.94864e-290	-0.351061	0.635	0.689	7.13222e-286	0
ADM	2.27368e-290	0.273924	0.823	0.578	8.3219e-286	0
MB21D2	6.86703e-290	-0.277837	0.208	0.41	2.5134e-285	0
FLI1	8.55405e-290	-0.256121	0.216	0.416	3.13087e-285	0
KCMF1	1.12185e-289	-0.396371	0.866	0.807	4.10608e-285	0
ZNF131	3.31688e-289	-0.345234	0.708	0.731	1.21401e-284	0
COX20	9.77733e-289	0.270757	0.976	0.843	3.5786e-284	0
CUL1	5.88525e-288	-0.339732	0.732	0.742	2.15406e-283	0
DDX5	9.26947e-288	-0.342106	0.983	0.893	3.39272e-283	0
NEMF	1.80639e-287	-0.316766	0.764	0.768	6.61158e-283	0
RGL1	2.67096e-287	-0.412114	0.433	0.568	9.77598e-283	0
SNHG14	6.12075e-287	-0.679964	0.654	0.71	2.24026e-282	0
TBK1	1.19897e-286	-0.298581	0.508	0.625	4.38835e-282	0
NUP214	1.45626e-286	-0.274482	0.495	0.617	5.33004e-282	0
GAPVD1	2.28174e-286	-0.312453	0.621	0.687	8.3514e-282	0
MAP4K5	3.64316e-286	-0.424466	0.87	0.818	1.33343e-281	0
STAU2	6.51647e-286	-0.402573	0.59	0.661	2.38509e-281	0
TLN2	1.42617e-284	-0.437107	0.537	0.628	5.21992e-280	0
PCBP1	1.78773e-284	0.269575	0.984	0.817	6.54328e-280	0
TXN	2.56297e-284	0.278756	0.998	0.976	9.38074e-280	0
FARP1	4.72129e-284	-0.595573	0.881	0.823	1.72804e-279	0
RPL7A	4.82386e-284	0.294907	0.999	0.97	1.76558e-279	0
SFXN5	2.13643e-283	-0.264499	0.279	0.464	7.81956e-279	0
COMMD10	4.17112e-283	-0.36987	0.684	0.719	1.52667e-278	0
MICU3	5.4218e-283	-0.388556	0.654	0.699	1.98443e-278	0
ZNF608	2.13174e-282	-0.31949	0.245	0.439	7.80239e-278	0
ATP8B1	2.85071e-282	-0.893525	0.696	0.714	1.04339e-277	0
LRPPRC	3.62533e-282	-0.328244	0.751	0.761	1.32691e-277	0
CASK	1.23847e-281	-0.368447	0.539	0.635	4.53291e-277	0
PIK3C3	1.31458e-281	-0.334464	0.501	0.615	4.8115e-277	0
C2CD3	2.7003e-280	-0.263491	0.301	0.48	9.88336e-276	0
OSBPL10	2.91725e-280	-0.294317	0.271	0.456	1.06774e-275	0
SCAI	3.93748e-280	-0.376699	0.489	0.607	1.44116e-275	0
PELI2	4.32929e-280	-0.258304	0.145	0.346	1.58456e-275	0
RAB3GAP1	3.32776e-279	-0.375541	0.852	0.807	1.21799e-274	0
AHI1	1.50066e-278	-0.404881	0.696	0.72	5.49258e-274	0
CBFB	1.87003e-278	-0.340594	0.608	0.674	6.84451e-274	0
SDK1	2.26678e-278	-0.444078	0.194	0.386	8.29665e-274	0
EPC2	5.12658e-278	-0.256037	0.38	0.538	1.87638e-273	0
RPS6	6.59474e-278	0.266676	0.999	0.976	2.41374e-273	0
CERT1	1.13114e-277	-0.362492	0.647	0.702	4.14008e-273	0
RNF217	1.28613e-277	-0.395942	0.54	0.633	4.70738e-273	0
PARP8	2.32142e-277	-0.262889	0.213	0.406	8.49665e-273	0
SMARCC1	2.81793e-277	-0.370966	0.832	0.802	1.03139e-272	0
CCSER2	4.33602e-277	-0.436774	0.812	0.779	1.58703e-272	0
DPH6-DT	4.57122e-277	-0.35597	0.13	0.326	1.67311e-272	0
PITX1	6.96871e-277	0.34571	0.736	0.51	2.55062e-272	0
CEBPD	1.78451e-276	0.273329	0.839	0.573	6.53148e-272	0
SEC24D	3.07075e-276	-0.498233	0.914	0.827	1.12393e-271	0
UBE2E1	1.00143e-275	-0.385569	0.793	0.772	3.66534e-271	0
CHFR	2.60797e-275	-0.309834	0.378	0.532	9.54543e-271	0
USP25	3.40071e-275	-0.332925	0.493	0.602	1.24469e-270	0
FOXK2	2.88422e-274	-0.297736	0.539	0.636	1.05565e-269	0
HLCS	2.99257e-274	-0.37271	0.514	0.608	1.09531e-269	0
PPP4R1	2.01702e-273	-0.342046	0.708	0.727	7.3825e-269	0
MTF2	2.98236e-273	-0.250917	0.374	0.54	1.09158e-268	0
ARHGAP21	3.22994e-273	-0.427866	0.85	0.8	1.18219e-268	0
IPO9	1.55463e-272	-0.319064	0.63	0.685	5.69009e-268	0
TRMT11	3.09562e-272	-0.269582	0.377	0.538	1.13303e-267	0
MOB1B	3.62428e-272	-0.363897	0.654	0.701	1.32652e-267	0
CHD6	8.81626e-272	-0.334481	0.575	0.65	3.22684e-267	0
IP6K1	1.0099e-271	-0.29741	0.479	0.599	3.69634e-267	0
CCNH	1.59138e-271	-0.344229	0.64	0.695	5.82462e-267	0
CNOT2	2.73932e-271	-0.335224	0.733	0.737	1.00262e-266	0
SLC25A6	3.41885e-271	0.267024	0.989	0.893	1.25133e-266	0
SLC7A6	3.85546e-271	-0.316485	0.477	0.597	1.41114e-266	0
BGN	7.67127e-271	0.265233	0.84	0.598	2.80776e-266	0
PACSIN2	8.28568e-271	-0.317358	0.556	0.64	3.03264e-266	0
TMEM158	1.11552e-270	0.411989	0.93	0.758	4.0829e-266	0
PHKB	3.87969e-270	-0.391343	0.763	0.761	1.42001e-265	0
SLC25A37	5.73919e-270	-0.320434	0.627	0.689	2.1006e-265	0
CLIP1	1.23912e-269	-0.427176	0.853	0.808	4.53531e-265	0
SFSWAP	1.26495e-269	-0.27388	0.583	0.665	4.62986e-265	0
F2R	1.30843e-269	0.317955	0.952	0.779	4.78899e-265	0
NAA15	1.45702e-269	-0.319691	0.644	0.692	5.33283e-265	0
GPBP1L1	1.07394e-268	-0.355347	0.652	0.691	3.93071e-264	0
TM4SF1	1.40038e-268	0.33369	0.962	0.823	5.12553e-264	0
ATE1	1.75751e-268	-0.32211	0.562	0.649	6.43265e-264	0
CWC27	7.53119e-268	-0.303055	0.655	0.704	2.75649e-263	0
PPP3CC	9.58206e-268	-0.320137	0.509	0.612	3.50713e-263	0
WDR59	2.21729e-267	-0.256343	0.343	0.507	8.11549e-263	0
CSNK1A1	1.05445e-266	-0.307856	0.984	0.915	3.8594e-262	0
HSDL2	1.50952e-266	-0.336523	0.713	0.739	5.52501e-262	0
FUBP1	2.04981e-266	-0.300633	0.608	0.682	7.50252e-262	0
S100A4	6.40011e-266	0.470178	0.903	0.695	2.3425e-261	0
TCERG1	2.3616e-265	-0.286403	0.59	0.671	8.6437e-261	0
AC073114.1	2.80485e-265	-0.518672	0.203	0.386	1.0266e-260	0
CDH13	1.02788e-264	-0.620385	0.458	0.573	3.76216e-260	0
CLIP2	2.3852e-264	-0.419823	0.607	0.665	8.73008e-260	0
AC002066.1	6.50481e-264	-0.356039	0.15	0.339	2.38083e-259	0
ARMC9	1.46803e-263	-0.734173	0.744	0.74	5.37314e-259	0
GRIK2	1.51902e-263	-0.661044	0.33	0.479	5.55975e-259	0
SFPQ	2.02924e-263	-0.434668	0.89	0.833	7.42724e-259	0
GLCCI1	2.71208e-263	-0.405223	0.359	0.512	9.92649e-259	0
ASAP2	2.90529e-263	-0.444222	0.705	0.711	1.06337e-258	0
SPPL3	9.69166e-263	-0.356759	0.701	0.713	3.54725e-258	0
CEP170	1.09897e-262	-0.566965	0.844	0.803	4.02233e-258	0
FOXP2	1.32451e-262	-0.41261	0.215	0.396	4.84785e-258	0
PRSS23	1.67829e-262	0.337502	0.976	0.878	6.14269e-258	0
DHRSX	2.52217e-262	-0.406822	0.78	0.757	9.23141e-258	0
LRRFIP2	1.25391e-261	-0.395815	0.928	0.848	4.58943e-257	0
TPT1-AS1	1.25716e-261	-0.2601	0.415	0.556	4.60134e-257	0
RPL15	1.42872e-261	0.255741	0.999	0.977	5.22925e-257	0
DCN	1.54436e-261	0.391016	0.991	0.93	5.65252e-257	0
EEF1A1	2.30488e-261	0.303274	1	0.996	8.43609e-257	0
OGA	5.2047e-261	-0.406677	0.806	0.774	1.90497e-256	0
BRIP1	6.61275e-261	-0.306696	0.076	0.264	2.42033e-256	0
MBNL2	1.65754e-260	-0.534101	0.872	0.81	6.06677e-256	0
SLF2	2.289e-260	-0.260403	0.447	0.575	8.37797e-256	0
OXSR1	2.74802e-260	-0.313302	0.646	0.694	1.0058e-255	0
DUSP1	3.02758e-260	0.316199	0.858	0.649	1.10812e-255	0
CDC27	4.31522e-260	-0.343443	0.827	0.79	1.57941e-255	0
DCAF10	7.84909e-260	-0.336478	0.685	0.711	2.87285e-255	0
PHIP	2.03629e-259	-0.3562	0.668	0.706	7.45301e-255	0
PIKFYVE	3.83131e-259	-0.282285	0.433	0.565	1.4023e-254	0
BICC1	4.18899e-259	-0.717306	0.835	0.781	1.53321e-254	0
MTCL1	6.99968e-259	-0.528385	0.719	0.713	2.56195e-254	0
GLI3	2.8154e-258	-0.277364	0.328	0.493	1.03046e-253	0
CDK6	3.42792e-258	-0.640296	0.948	0.879	1.25465e-253	0
CAPN7	4.41421e-258	-0.311636	0.591	0.661	1.61565e-253	0
NOP58	6.25169e-258	-0.296715	0.588	0.674	2.28818e-253	0
RIN2	7.83368e-258	-0.70298	0.897	0.819	2.86721e-253	0
NUP153	9.364e-258	-0.318691	0.582	0.655	3.42732e-253	0
HEATR5B	1.49709e-257	-0.262065	0.358	0.515	5.47949e-253	0
APPBP2	3.63355e-257	-0.349632	0.712	0.725	1.32992e-252	0
LARP1B	4.01628e-257	-0.326239	0.569	0.648	1.47e-252	0
CEP128	1.72097e-256	-0.276546	0.075	0.259	6.29893e-252	0
GLIPR1	1.96493e-256	0.280447	0.968	0.819	7.19186e-252	0
WDR1	1.98202e-256	0.268244	0.976	0.853	7.25441e-252	0
B3GALNT2	3.63158e-256	-0.29044	0.474	0.591	1.3292e-251	0
DCP1A	7.24423e-256	-0.27793	0.524	0.622	2.65146e-251	0
SUMO2	7.76027e-256	0.265264	0.994	0.917	2.84034e-251	0
EIF4G2	1.37731e-255	0.272321	0.994	0.934	5.04108e-251	0
LINC02615	1.8265e-255	-0.275328	0.099	0.283	6.68515e-251	0
AHCTF1	2.11327e-254	-0.27423	0.539	0.636	7.7348e-250	0
CNKSR3	2.45532e-254	-0.345503	0.357	0.509	8.98672e-250	0
RAB3GAP2	2.89523e-254	-0.367089	0.713	0.721	1.05968e-249	0
SP100	7.95296e-254	-0.399026	0.839	0.802	2.91086e-249	0
MSH3	3.74317e-253	-0.294006	0.556	0.641	1.37004e-248	0
DGKI	5.88644e-253	-0.429059	0.337	0.498	2.1545e-248	0
STAT1	6.02835e-253	0.257313	0.942	0.78	2.20644e-248	0
EP400	7.77192e-253	-0.278098	0.568	0.65	2.8446e-248	0
PRKRIP1	8.8774e-253	-0.300033	0.646	0.691	3.24922e-248	0
AL645568.1	1.1061e-252	-0.362447	0.291	0.459	4.04843e-248	0
FARP2	2.93609e-252	-0.263831	0.389	0.535	1.07464e-247	0
PRORP	7.52235e-252	-0.29662	0.553	0.636	2.75326e-247	0
SLC38A6	8.25295e-252	-0.359565	0.624	0.678	3.02066e-247	0
POLK	1.57054e-251	-0.321695	0.621	0.677	5.74834e-247	0
TNIK	2.23922e-251	-0.392763	0.334	0.487	8.19577e-247	0
UBAC2	2.74664e-250	-0.308847	0.606	0.665	1.0053e-245	0
EID1	5.92854e-250	0.261897	0.995	0.915	2.16991e-245	0
SEMA3C	6.24387e-250	-0.491997	0.577	0.644	2.28532e-245	0
RAB6A	2.14282e-249	-0.380611	0.831	0.8	7.84294e-245	0
SNHG3	2.42638e-249	-0.430702	0.626	0.685	8.88078e-245	0
GPBP1	3.14151e-249	-0.302145	0.759	0.752	1.14982e-244	0
ZNF652	4.67128e-249	-0.312835	0.567	0.642	1.70973e-244	0
ZMYND8	5.97202e-249	-0.421959	0.671	0.699	2.18582e-244	0
LSAMP	1.08781e-247	-0.901492	0.364	0.496	3.98148e-243	0
VPS45	1.53303e-247	-0.282991	0.503	0.605	5.61104e-243	0
HS2ST1	1.57534e-247	-0.349687	0.555	0.631	5.7659e-243	0
ACYP2	2.92882e-247	-0.509873	0.681	0.696	1.07198e-242	0
LONP2	6.20682e-247	-0.334948	0.768	0.753	2.27176e-242	0
MDM4	7.30177e-247	-0.262044	0.479	0.603	2.67252e-242	0
CMSS1	8.04633e-247	-0.443186	0.621	0.675	2.94504e-242	0
SS18	1.87618e-246	-0.329517	0.677	0.7	6.86701e-242	0
PRDM2	2.69786e-246	-0.277455	0.522	0.62	9.87442e-242	0
GPR176	3.21807e-246	-0.471858	0.812	0.774	1.17785e-241	0
WDR33	3.97833e-246	-0.28322	0.682	0.714	1.45611e-241	0
WDR44	5.16827e-246	-0.339475	0.521	0.607	1.89164e-241	0
HMGA2	2.18625e-245	-1.2835	0.838	0.819	8.0019e-241	0
PCLAF	2.65282e-245	-0.561747	0.147	0.343	9.70958e-241	0
ADARB1	4.11642e-245	-0.342102	0.308	0.471	1.50665e-240	0
ZMIZ1	8.20407e-245	-0.371365	0.669	0.699	3.00277e-240	0
ROCK2	1.25063e-244	-0.381369	0.896	0.822	4.57744e-240	0
EVI5	1.54523e-244	-0.504183	0.878	0.82	5.65569e-240	0
PPP1R21	3.59335e-244	-0.287354	0.436	0.56	1.3152e-239	0
SPTBN1	4.90431e-244	-0.437418	0.934	0.874	1.79503e-239	0
KLHDC10	6.20253e-244	-0.349151	0.691	0.709	2.27019e-239	0
EP300	1.11373e-243	-0.30714	0.638	0.686	4.07637e-239	0
CRTC3	2.28559e-243	-0.303181	0.572	0.643	8.3655e-239	0
GNG12-AS1	2.52432e-243	-0.256551	0.265	0.439	9.23925e-239	0
XPO1	3.0224e-243	-0.383234	0.854	0.797	1.10623e-238	0
ANO6	1.8509e-242	-0.34409	0.704	0.716	6.77446e-238	0
CDC73	3.72405e-242	-0.324242	0.789	0.768	1.36304e-237	0
KIF2A	5.09482e-242	-0.314288	0.745	0.738	1.86475e-237	0
ANKRD26	1.40966e-241	-0.268715	0.457	0.577	5.1595e-237	0
HOOK3	1.49481e-241	-0.356226	0.804	0.771	5.47114e-237	0
PARN	4.93514e-241	-0.265994	0.478	0.587	1.80631e-236	0
MT-CO2	1.37687e-240	-0.515108	0.981	0.991	5.03948e-236	0
NCOA3	1.96187e-240	-0.428083	0.712	0.723	7.18064e-236	0
EIF4EBP1	2.3889e-240	0.297964	0.938	0.72	8.74361e-236	0
DDX39B	3.60979e-240	-0.273171	0.799	0.8	1.32122e-235	0
MMS22L	4.41622e-240	-0.263646	0.15	0.332	1.61638e-235	0
CREB1	4.93503e-240	-0.332088	0.672	0.698	1.80627e-235	0
AC004917.1	9.24651e-240	-0.353624	0.189	0.365	3.38431e-235	0
ANKRD13C	1.75933e-239	-0.287911	0.537	0.619	6.43932e-235	0
YLPM1	5.97705e-239	-0.321218	0.697	0.712	2.18766e-234	0
GPATCH2L	3.32278e-238	-0.324101	0.663	0.698	1.21617e-233	0
TLE4	3.39406e-238	-0.456288	0.679	0.704	1.24226e-233	0
HIF1A-AS3	1.12739e-237	-0.388338	0.135	0.323	4.12636e-233	0
ZHX3	2.32752e-237	-0.412735	0.8	0.755	8.51895e-233	0
TRAF3	3.99026e-237	-0.327499	0.49	0.586	1.46048e-232	0
VEGFC	5.17472e-237	-0.756274	0.793	0.752	1.894e-232	0
RSRC1	5.61998e-237	-0.318131	0.564	0.635	2.05697e-232	0
RFX8	7.0589e-237	-0.300078	0.187	0.365	2.58363e-232	0
NUP58	7.1464e-237	-0.278456	0.567	0.644	2.61565e-232	0
PBX1	1.52974e-236	-0.531831	0.721	0.72	5.59899e-232	0
ERCC6L2	1.06362e-235	-0.265336	0.468	0.577	3.89294e-231	0
NAP1L4	1.45743e-235	-0.318359	0.899	0.846	5.33434e-231	0
SASH1	1.70911e-235	-0.576755	0.817	0.773	6.25553e-231	0
NNMT	4.41824e-235	0.288121	0.813	0.571	1.61712e-230	0
DOCK7	5.08777e-235	-0.407698	0.856	0.8	1.86218e-230	0
BTBD7	1.63661e-234	-0.333687	0.76	0.746	5.99014e-230	0
KDM5B	4.8975e-234	-0.40327	0.836	0.773	1.79253e-229	0
SNX4	7.54698e-234	-0.279473	0.606	0.665	2.76227e-229	0
PDLIM1	1.56736e-233	0.290764	0.985	0.907	5.73669e-229	0
AKAP8L	1.84875e-233	-0.310265	0.657	0.695	6.76661e-229	0
DMXL1	2.63277e-233	-0.311793	0.49	0.587	9.63621e-229	0
RSF1	5.55834e-233	-0.349666	0.854	0.802	2.03441e-228	0
PRR14L	6.00439e-233	-0.281337	0.538	0.623	2.19767e-228	0
KMT2A	6.26318e-233	-0.33669	0.828	0.787	2.29239e-228	0
APPL2	1.59586e-232	-0.329061	0.711	0.724	5.84102e-228	0
ABL2	3.28488e-232	-0.435729	0.792	0.769	1.2023e-227	0
RBMS2	3.42419e-232	-0.485082	0.848	0.786	1.25329e-227	0
LIX1-AS1	3.96484e-232	-0.252529	0.086	0.259	1.45117e-227	0
LAMB1	4.42244e-232	-0.561979	0.665	0.706	1.61866e-227	0
PHF14	4.50731e-232	-0.313786	0.581	0.652	1.64972e-227	0
WDR43	8.63823e-232	-0.344857	0.822	0.789	3.16168e-227	0
CHD1	1.081e-231	-0.279396	0.539	0.627	3.95655e-227	0
UHRF2	1.51686e-231	-0.293313	0.521	0.609	5.55186e-227	0
MIR924HG	2.33161e-231	-0.407387	0.048	0.211	8.53392e-227	0
ATRN	5.87934e-230	-0.29838	0.526	0.608	2.1519e-225	0
E2F3	1.25874e-229	-0.318601	0.548	0.625	4.60711e-225	0
ARHGEF7	1.86757e-229	-0.264567	0.467	0.576	6.83548e-225	0
RALGAPB	2.44323e-228	-0.3261	0.585	0.641	8.94248e-224	0
KATNBL1	3.21435e-228	-0.323352	0.751	0.74	1.17648e-223	0
EEA1	4.08874e-228	-0.431349	0.889	0.818	1.49652e-223	0
TLK2	6.50567e-228	-0.305476	0.651	0.688	2.38114e-223	0
EPS15	6.51581e-228	-0.312244	0.686	0.704	2.38485e-223	0
UBAP1	5.38543e-227	-0.270334	0.48	0.585	1.97112e-222	0
SLC25A13	5.8208e-226	-0.262038	0.459	0.57	2.13047e-221	0
CNNM2	9.57148e-226	-0.393265	0.424	0.539	3.50326e-221	0
AC011586.2	1.44466e-225	-0.400827	0.178	0.347	5.28761e-221	0
COL4A5	1.67547e-225	-0.576599	0.409	0.527	6.13237e-221	0
CTTNBP2	1.3057e-224	-0.284667	0.279	0.441	4.779e-220	0
SERPINH1	2.13637e-224	0.304838	0.979	0.79	7.81933e-220	0
AAK1	2.65459e-223	-0.368357	0.924	0.843	9.71605e-219	0
SEC31A	3.12158e-223	-0.339965	0.985	0.921	1.14253e-218	0
DCAF6	4.73454e-223	-0.453808	0.835	0.797	1.73289e-218	0
DNAJB14	1.26438e-222	-0.3266	0.794	0.766	4.62777e-218	0
NAA35	4.68413e-222	-0.263836	0.571	0.638	1.71444e-217	0
XYLT1	1.09461e-221	-0.645586	0.595	0.652	4.00638e-217	0
BAZ1B	1.47201e-221	-0.333027	0.791	0.774	5.38771e-217	0
GATAD2A	1.63507e-221	-0.325526	0.732	0.732	5.98452e-217	0
PIK3CB	2.76737e-221	-0.259761	0.432	0.548	1.01289e-216	0
UQCC1	7.76265e-221	-0.267899	0.461	0.569	2.84121e-216	0
PTPN13	2.00943e-220	-0.426438	0.614	0.659	7.35471e-216	0
ZNF516	1.83377e-219	-0.302715	0.403	0.524	6.7118e-215	0
TSC22D2	2.73103e-219	-0.593036	0.839	0.789	9.99583e-215	0
GPCPD1	3.0622e-219	-0.264781	0.425	0.549	1.1208e-214	0
PRELID2	1.168e-218	-0.287156	0.239	0.4	4.27501e-214	0
UBASH3B	2.66356e-218	-0.408071	0.54	0.615	9.7489e-214	0
TP53BP1	1.6087e-217	-0.294734	0.716	0.717	5.888e-213	0
MTA3	3.24265e-217	-0.290508	0.532	0.619	1.18684e-212	0
PIP4K2A	4.63765e-217	-0.315543	0.543	0.612	1.69742e-212	0
TNPO3	6.4701e-217	-0.271926	0.598	0.655	2.36812e-212	0
HDAC9	1.125e-216	-0.327805	0.182	0.35	4.11762e-212	0
DIAPH3	1.87095e-216	-0.63209	0.371	0.5	6.84786e-212	0
LUM	2.08385e-216	0.422328	0.944	0.754	7.6271e-212	0
VPS13C	3.04009e-216	-0.313257	0.685	0.708	1.1127e-211	0
PRRC2B	3.63019e-216	-0.323928	0.793	0.766	1.32869e-211	0
BTBD10	1.13973e-215	-0.33013	0.698	0.704	4.17153e-211	0
FAR1	1.18167e-215	-0.283116	0.549	0.62	4.32504e-211	0
VPS35L	2.15681e-215	-0.267803	0.566	0.633	7.89416e-211	0
ZFYVE16	2.16383e-215	-0.25979	0.581	0.653	7.91985e-211	0
LINC01278	3.03804e-215	-0.308356	0.403	0.519	1.11195e-210	0
NSRP1	9.14786e-215	-0.374377	0.854	0.818	3.34821e-210	0
RALGPS2	7.71859e-214	-0.442745	0.71	0.708	2.82508e-209	0
DHX32	1.365e-213	-0.274571	0.493	0.588	4.99604e-209	0
ZFYVE9	2.48985e-213	-0.2911	0.478	0.576	9.11311e-209	0
UBE3C	3.46329e-213	-0.343619	0.84	0.793	1.2676e-208	0
RABEP1	3.99513e-213	-0.301863	0.794	0.773	1.46226e-208	0
MMP16	5.2127e-213	-0.365846	0.33	0.471	1.9079e-208	0
POLH	1.29897e-212	-0.272762	0.431	0.548	4.75436e-208	0
RRM2	3.62712e-212	-0.452473	0.082	0.25	1.32756e-207	0
ZNHIT6	1.25861e-211	-0.301749	0.572	0.64	4.60665e-207	0
XRRA1	2.6198e-211	-0.255574	0.515	0.601	9.58871e-207	0
APP	4.99776e-211	-0.374888	0.934	0.868	1.82923e-206	0
S100A10	6.18643e-211	0.294298	0.994	0.933	2.2643e-206	0
HNRNPM	6.75403e-211	-0.333331	0.92	0.847	2.47204e-206	0
CERS5	8.25137e-211	-0.317855	0.655	0.679	3.02008e-206	0
HUWE1	1.16636e-210	-0.343307	0.859	0.808	4.26898e-206	0
LAMA2	2.6706e-210	-0.275194	0.181	0.347	9.77466e-206	0
OGT	4.81035e-210	-0.257988	0.391	0.522	1.76064e-205	0
AGFG1	6.23204e-210	-0.316701	0.774	0.756	2.28099e-205	0
SESN1	7.1678e-210	-0.307553	0.427	0.541	2.62349e-205	0
MYO5A	8.15891e-210	-0.318045	0.642	0.674	2.98624e-205	0
DDB2	2.03776e-209	-0.383216	0.57	0.636	7.4584e-205	0
SETX	3.1556e-209	-0.312654	0.74	0.733	1.15498e-204	0
E2F7	9.00464e-209	-0.448135	0.349	0.488	3.29579e-204	0
ZNF586	9.98046e-209	-0.250786	0.319	0.463	3.65295e-204	0
TJP1	1.17349e-208	-0.355506	0.925	0.838	4.2951e-204	0
KPNA3	1.23511e-208	-0.324252	0.918	0.848	4.52064e-204	0
NIN	1.38879e-208	-0.296596	0.635	0.666	5.08313e-204	0
EIF2B3	1.65559e-208	-0.294428	0.709	0.72	6.05962e-204	0
SSH1	2.04603e-208	-0.407632	0.752	0.735	7.48867e-204	0
KCNMB2-AS1	2.7437e-208	-0.254428	0.065	0.22	1.00422e-203	0
ARHGAP35	3.44089e-208	-0.286599	0.616	0.659	1.2594e-203	0
SLC38A9	4.07207e-208	-0.268771	0.399	0.519	1.49042e-203	0
ATM	6.39158e-208	-0.349151	0.754	0.739	2.33938e-203	0
ZMYND11	8.47408e-208	-0.300836	0.77	0.756	3.1016e-203	0
BIRC5	1.33138e-207	-0.394596	0.082	0.25	4.87297e-203	0
SPATA7	1.64204e-207	-0.255175	0.347	0.484	6.01002e-203	0
NFKBIZ	4.61231e-207	-0.357335	0.422	0.532	1.68815e-202	0
NUSAP1	5.52152e-207	-0.343088	0.076	0.24	2.02093e-202	0
PLCG2	8.1658e-207	-0.64916	0.213	0.387	2.98877e-202	0
UBE2K	8.96958e-207	-0.312565	0.945	0.866	3.28296e-202	0
NDUFAF6	4.82727e-206	-0.310083	0.563	0.624	1.76683e-201	0
CDK19	1.26235e-205	-0.26771	0.368	0.495	4.62032e-201	0
HNRNPD	1.41957e-205	-0.451478	0.876	0.818	5.19576e-201	0
GPX8	3.10372e-205	0.263029	0.983	0.868	1.13599e-200	0
TK1	4.05982e-205	-0.287883	0.151	0.327	1.48594e-200	0
MTREX	5.84178e-205	-0.25898	0.639	0.682	2.13815e-200	0
HRH1	5.9669e-205	-0.373727	0.543	0.608	2.18395e-200	0
SPTLC2	9.92676e-205	-0.310884	0.643	0.671	3.63329e-200	0
MIB1	2.22334e-204	-0.296148	0.672	0.695	8.13764e-200	0
PLD1	3.46025e-204	-0.276135	0.233	0.389	1.26649e-199	0
MDFIC	6.4006e-204	-0.332419	0.688	0.699	2.34268e-199	0
MPDZ	7.06216e-204	-0.29452	0.569	0.634	2.58482e-199	0
TRAPPC12	3.00502e-203	-0.27132	0.582	0.642	1.09987e-198	0
MFHAS1	1.37803e-202	-0.266504	0.43	0.542	5.04373e-198	0
LINC00511	1.5991e-202	-0.251006	0.159	0.324	5.85285e-198	0
SUGP2	1.74395e-202	-0.306033	0.631	0.664	6.38305e-198	0
DENND5A	5.66909e-202	-0.363766	0.762	0.743	2.07494e-197	0
UACA	5.71954e-202	-1.15106	0.946	0.891	2.09341e-197	0
SUPT20H	1.57371e-201	-0.257865	0.639	0.677	5.75995e-197	0
ABCC4	1.94147e-201	-0.89539	0.86	0.797	7.10598e-197	0
NASP	7.8636e-201	-0.476649	0.613	0.666	2.87816e-196	0
UBTD2	9.22532e-201	-0.265378	0.501	0.583	3.37656e-196	0
RANBP9	1.58655e-200	-0.288994	0.698	0.704	5.80694e-196	0
ITSN2	1.69565e-200	-0.265835	0.55	0.617	6.20626e-196	0
MKI67	1.76209e-200	-0.39747	0.046	0.194	6.44944e-196	0
VRK2	2.13549e-199	-0.299402	0.549	0.613	7.81612e-195	0
ATF2	3.65519e-199	-0.255809	0.538	0.614	1.33784e-194	0
OXR1	5.27673e-199	-0.73031	0.696	0.698	1.93134e-194	0
CTTNBP2NL	6.78467e-199	-0.361487	0.819	0.774	2.48326e-194	0
TMEM87A	8.97301e-199	-0.283738	0.808	0.765	3.28421e-194	0
LRRFIP1	1.36104e-198	-0.344914	0.939	0.858	4.98155e-194	0
MSI2	1.57267e-198	-0.44476	0.658	0.67	5.75614e-194	0
SUSD6	1.85007e-198	-0.279179	0.448	0.551	6.77144e-194	0
UMAD1	2.42417e-198	-0.287891	0.429	0.531	8.87269e-194	0
MIPEP	5.64713e-198	-0.264047	0.354	0.489	2.06691e-193	0
BMERB1	6.7336e-198	-0.393943	0.726	0.719	2.46457e-193	0
TAB2	8.78634e-198	-0.301788	0.686	0.693	3.21589e-193	0
EPS8	1.8065e-197	-0.369255	0.735	0.725	6.61199e-193	0
RNF115	3.1126e-197	-0.396348	0.931	0.852	1.13924e-192	0
TIMP3	5.30923e-197	0.343889	0.963	0.834	1.94323e-192	0
ARPC2	1.22037e-196	0.25226	0.995	0.966	4.46669e-192	0
CTNND1	7.00963e-196	-0.425761	0.861	0.797	2.56559e-191	0
ABTB2	1.64907e-195	-0.269546	0.155	0.313	6.03577e-191	0
SNX13	3.36769e-195	-0.266721	0.536	0.607	1.23261e-190	0
HBD	8.89554e-195	0.355166	0.225	0.086	3.25586e-190	0
KIAA0825	1.01498e-194	-0.25255	0.159	0.315	3.71494e-190	0
PAX8-AS1	1.03809e-194	-0.327216	0.7	0.711	3.79953e-190	0
TNRC6B	1.30732e-194	-0.393343	0.844	0.787	4.78492e-190	0
SRPK1	1.53516e-194	-0.303005	0.81	0.775	5.61885e-190	0
TSC22D1	4.13342e-194	-0.599759	0.867	0.8	1.51287e-189	0
FBXW11	4.55911e-194	-0.310764	0.878	0.811	1.66868e-189	0
TAOK1	9.18584e-194	-0.356051	0.866	0.805	3.36211e-189	0
DIP2A	1.59678e-193	-0.256073	0.535	0.611	5.84437e-189	0
TBC1D19	1.76402e-193	-0.638873	0.571	0.623	6.45649e-189	0
ADAMTSL1	2.85971e-193	-0.434643	0.205	0.357	1.04668e-188	0
ZNF207	3.21401e-193	-0.289728	0.918	0.845	1.17636e-188	0
CKAP5	4.99158e-193	-0.312344	0.72	0.72	1.82697e-188	0
GRK5	1.90141e-192	-0.419979	0.489	0.569	6.95936e-188	0
CLOCK	3.74557e-192	-0.283312	0.671	0.686	1.37092e-187	0
HIPK2	3.84663e-192	-0.580727	0.949	0.892	1.40791e-187	0
MELK	6.6477e-192	-0.25244	0.129	0.287	2.43313e-187	0
SYT1	9.51839e-192	-0.439632	0.369	0.486	3.48383e-187	0
DHX9	1.4388e-191	-0.294886	0.779	0.76	5.26615e-187	0
CENPF	3.63496e-191	-0.545355	0.097	0.256	1.33043e-186	0
ODF2L	6.09352e-191	-0.256702	0.538	0.607	2.23029e-186	0
PIK3C2A	8.05698e-191	-0.291838	0.722	0.72	2.94894e-186	0
LRP6	1.30569e-190	-0.339005	0.617	0.653	4.77894e-186	0
NPEPPS	1.31718e-190	-0.317089	0.878	0.817	4.82102e-186	0
TENM4	1.48477e-190	-0.310699	0.213	0.363	5.4344e-186	0
MALT1	1.92168e-190	-0.265996	0.498	0.583	7.03355e-186	0
CNST	2.21547e-190	-0.331391	0.659	0.675	8.10885e-186	0
RARS2	9.58544e-190	-0.314485	0.846	0.802	3.50837e-185	0
ADAM17	1.33229e-189	-0.26832	0.572	0.629	4.87631e-185	0
SPATS2	1.43123e-189	-0.414187	0.915	0.834	5.23845e-185	0
ANTXR2	6.22291e-189	-0.368656	0.723	0.713	2.27765e-184	0
CCAR1	6.82494e-189	-0.264483	0.84	0.799	2.498e-184	0
UBE2G1	8.12644e-189	-0.322676	0.78	0.747	2.97436e-184	0
KCNMA1	8.76209e-189	-0.614182	0.761	0.748	3.20701e-184	0
IGF2BP1	1.37146e-188	-0.255612	0.598	0.648	5.01968e-184	0
RCOR3	2.00964e-188	-0.256252	0.558	0.618	7.35549e-184	0
GALNT10	3.24025e-188	-0.576437	0.882	0.806	1.18596e-183	0
SH3D19	3.71825e-188	-0.38518	0.548	0.603	1.36092e-183	0
DNAJC7	4.74574e-188	-0.250965	0.881	0.83	1.73699e-183	0
CALU	7.45663e-188	0.268585	0.997	0.963	2.7292e-183	0
NT5DC1	1.69819e-187	-0.288799	0.526	0.602	6.21554e-183	0
SLIT2	2.52419e-187	-0.512184	0.267	0.404	9.2388e-183	0
ARHGAP17	2.58164e-187	-0.312792	0.699	0.701	9.44907e-183	0
UBA2	2.62486e-187	-0.280072	0.843	0.789	9.60726e-183	0
CNOT4	3.17583e-187	-0.288943	0.726	0.725	1.16239e-182	0
CDH4	7.52586e-187	-0.458977	0.359	0.475	2.75454e-182	0
SFRP1	8.64832e-187	0.420682	0.958	0.845	3.16537e-182	0
MAP3K2	1.22535e-186	-0.267868	0.688	0.701	4.48492e-182	0
GPD2	1.55923e-186	-0.27198	0.457	0.551	5.70693e-182	0
TMEM65	2.30915e-186	-0.269333	0.445	0.545	8.45173e-182	0
CDR2	2.40097e-186	-0.298793	0.64	0.664	8.78779e-182	0
PPP4R3A	2.86381e-186	-0.254556	0.62	0.657	1.04818e-181	0
DAP3	4.41152e-186	-0.294874	0.843	0.803	1.61466e-181	0
LCLAT1	6.03624e-186	-0.279147	0.434	0.532	2.20933e-181	0
ABI2	1.2939e-185	-0.287842	0.76	0.739	4.73582e-181	0
FLNB	1.49047e-185	-0.394801	0.695	0.69	5.45525e-181	0
HNRNPR	2.33748e-185	-0.399987	0.924	0.844	8.5554e-181	0
HIPK3	9.94755e-185	-0.341848	0.686	0.697	3.6409e-180	0
TSHZ3	1.51692e-184	-0.395709	0.679	0.681	5.55207e-180	0
CCBE1	2.09144e-184	-0.905218	0.693	0.681	7.65486e-180	0
ASPH	2.18561e-184	-0.531447	0.988	0.937	7.99954e-180	0
CREB3L2	4.39206e-184	-0.38474	0.817	0.765	1.60754e-179	0
HOXB3	8.35806e-184	-0.38504	0.568	0.623	3.05913e-179	0
WWTR1	1.69704e-183	-0.44278	0.872	0.827	6.21135e-179	0
CEMIP2	1.82749e-183	-0.31546	0.53	0.599	6.68881e-179	0
PRC1	6.43133e-183	-0.430084	0.099	0.252	2.35393e-178	0
STX16	1.30287e-182	-0.268223	0.68	0.692	4.76864e-178	0
IGFBP3	2.27525e-182	0.366408	0.755	0.529	8.32763e-178	0
RYK	4.82393e-182	-0.282194	0.811	0.778	1.76561e-177	0
TAGLN	5.15745e-182	0.410615	0.998	0.95	1.88768e-177	0
AFAP1	5.60266e-182	-0.452374	0.783	0.737	2.05063e-177	0
PBK	6.53881e-182	-0.264104	0.054	0.197	2.39327e-177	0
THBS1	1.08479e-181	0.375166	0.982	0.824	3.97044e-177	0
RNF216	1.12616e-181	-0.309585	0.811	0.759	4.12184e-177	0
PRKDC	6.41806e-181	-0.383503	0.946	0.85	2.34908e-176	0
ZNF827	8.23236e-181	-0.311868	0.598	0.635	3.01313e-176	0
SENP5	9.46834e-180	-0.279703	0.717	0.711	3.46551e-175	0
ZNF91	9.53172e-179	-0.256073	0.333	0.456	3.4887e-174	0
GAPDH	1.34938e-178	0.264461	1	0.987	4.93886e-174	0
UBA6	3.97225e-178	-0.259841	0.714	0.712	1.45388e-173	0
ESYT2	4.42361e-178	-0.292384	0.611	0.642	1.61908e-173	0
NXN	6.27708e-178	-0.744303	0.88	0.799	2.29747e-173	0
DLGAP5	7.35844e-178	-0.297742	0.061	0.203	2.69326e-173	0
MYCBP2	7.9091e-178	-0.324344	0.914	0.832	2.89481e-173	0
CEMIP	9.47044e-178	-0.419577	0.636	0.389	3.46628e-173	0
TRIP12	1.07653e-177	-0.346227	0.901	0.822	3.94022e-173	0
HNRNPH3	1.56572e-177	-0.335434	0.856	0.814	5.7307e-173	0
KIAA2026	2.26534e-177	-0.299647	0.567	0.618	8.29137e-173	0
DDX46	4.30272e-177	-0.293906	0.886	0.832	1.57484e-172	0
PPP2R5E	3.83434e-176	-0.301848	0.872	0.808	1.40341e-171	0
NPM1	2.22358e-175	-0.426546	0.992	0.956	8.13852e-171	0
ROCK1	1.89175e-174	-0.304147	0.893	0.83	6.924e-170	0
TOM1L2	1.51759e-173	-0.340429	0.582	0.623	5.55455e-169	0
NBEAL1	2.77386e-173	-0.443495	0.887	0.811	1.01526e-168	0
PHF3	3.4731e-173	-0.290327	0.714	0.719	1.27119e-168	0
FLRT2	5.97078e-173	-0.466521	0.425	0.521	2.18537e-168	0
MARK4	6.38255e-173	-0.307944	0.515	0.579	2.33608e-168	0
TRHDE-AS1	6.97491e-173	-0.312665	0.444	0.535	2.55289e-168	0
ANLN	1.1471e-172	-0.460999	0.118	0.268	4.1985e-168	0
TUBA1A	1.72357e-172	0.366766	0.989	0.866	6.30843e-168	0
NUTM2B-AS1	2.70616e-172	-0.252023	0.633	0.658	9.90481e-168	0
SNX1	4.76449e-172	-0.258645	0.635	0.66	1.74385e-167	0
SLC25A43	2.18051e-171	-0.266745	0.465	0.549	7.98089e-167	0
WAPL	2.99678e-171	-0.256571	0.702	0.705	1.09685e-166	0
DCUN1D4	5.96731e-171	-0.299622	0.606	0.634	2.1841e-166	0
RIF1	9.52577e-171	-0.272555	0.64	0.672	3.48653e-166	0
CLSPN	1.45768e-170	-0.260818	0.068	0.208	5.33525e-166	0
PIGN	1.89236e-170	-0.286049	0.458	0.545	6.92621e-166	0
ITPR2	1.92466e-170	-0.288254	0.341	0.461	7.04444e-166	0
FRMPD4	4.67293e-170	-0.529959	0.233	0.369	1.71034e-165	0
STK10	4.88318e-170	-0.258381	0.45	0.537	1.78729e-165	0
ELF1	1.30536e-169	-0.419015	0.731	0.702	4.77774e-165	0
CUL5	6.28102e-169	-0.272373	0.82	0.77	2.29892e-164	0
LYST	1.2773e-168	-0.304632	0.435	0.524	4.67505e-164	0
TOP1	6.42136e-168	-0.332027	0.964	0.894	2.35028e-163	0
FAF2	1.3613e-167	-0.250565	0.826	0.776	4.98251e-163	0
OPA1	2.37258e-167	-0.255857	0.646	0.667	8.68389e-163	0
AL139260.1	1.25834e-166	-0.29751	0.391	0.492	4.60564e-162	0
SMC4	1.42436e-166	-0.464949	0.359	0.479	5.21329e-162	0
NSD3	9.97524e-166	-0.299948	0.856	0.794	3.65104e-161	0
RAPGEF1	1.32123e-165	-0.286465	0.551	0.603	4.83583e-161	0
SYNJ2	7.35048e-165	-0.394609	0.766	0.733	2.69035e-160	0
TPR	1.87624e-164	-0.274911	0.812	0.773	6.86724e-160	0
SGK3	2.33396e-164	-0.308416	0.612	0.645	8.54253e-160	0
FAP	1.32215e-163	-0.38091	0.689	0.692	4.83921e-159	0
MSRB3	1.64862e-163	-0.436607	0.928	0.848	6.03412e-159	0
C5orf66	1.70991e-163	-0.255231	0.169	0.31	6.25844e-159	0
HSPD1	2.8577e-163	-0.482997	0.96	0.875	1.04595e-158	0
KIAA0232	3.28417e-163	-0.272323	0.654	0.667	1.20204e-158	0
RNF150	3.71448e-163	-0.272846	0.287	0.411	1.35954e-158	0
CTNNA1	4.03197e-163	-0.307695	0.951	0.882	1.47574e-158	0
NFKB1	7.27585e-163	-0.274392	0.578	0.62	2.66304e-158	0
HECTD1	9.38604e-163	-0.273736	0.893	0.82	3.43539e-158	0
G2E3	1.44759e-162	-0.251149	0.493	0.57	5.29832e-158	0
UBE2H	3.929e-162	-0.429709	0.911	0.833	1.43805e-157	0
HNRNPA3	6.37682e-162	-0.335383	0.962	0.901	2.33398e-157	0
WDFY1	5.27237e-161	-0.288296	0.79	0.752	1.92974e-156	0
ALCAM	1.41462e-160	-0.524246	0.961	0.875	5.17763e-156	0
MID1	1.49904e-160	-0.348759	0.558	0.602	5.48663e-156	0
KIF20B	1.63281e-160	-0.318046	0.174	0.32	5.97626e-156	0
PPA2	2.0955e-160	-0.253847	0.668	0.684	7.66974e-156	0
ETS1	8.98722e-160	-0.266009	0.58	0.624	3.28941e-155	0
STK24	1.45693e-159	-0.265363	0.728	0.716	5.33252e-155	0
USP10	1.78643e-159	-0.260162	0.773	0.741	6.53853e-155	0
PAWR	4.47166e-159	-0.334106	0.81	0.768	1.63667e-154	0
RHBDD1	2.05655e-158	-0.274758	0.492	0.556	7.52718e-154	0
KPNA1	2.25283e-158	-0.258692	0.795	0.766	8.24558e-154	0
TMEM176A	3.02436e-158	0.258386	0.278	0.135	1.10695e-153	0
SLC4A4	1.32213e-157	-0.739478	0.695	0.672	4.83912e-153	0
SEPTIN10	1.5647e-157	-0.266141	0.829	0.785	5.72696e-153	0
MSRA	2.05633e-157	-0.279157	0.579	0.617	7.52637e-153	0
SREBF2	2.34298e-157	-0.27686	0.487	0.557	8.57556e-153	0
PPARD	2.86562e-157	-0.260104	0.539	0.591	1.04885e-152	0
NPAS2	4.9385e-156	-0.278266	0.357	0.467	1.80754e-151	0
TNS3	5.7093e-156	-0.586017	0.866	0.793	2.08966e-151	0
PRKCI	1.12117e-155	-0.336248	0.851	0.782	4.10358e-151	0
DIAPH1	1.34291e-155	-0.266338	0.572	0.613	4.91519e-151	0
AK5	9.02737e-155	-0.486046	0.7	0.677	3.30411e-150	0
CORO1C	1.54289e-154	-0.385454	0.943	0.87	5.64714e-150	0
RASA3	1.81497e-154	-0.285464	0.54	0.586	6.64297e-150	0
BMPR1B	3.86794e-154	-0.275826	0.217	0.35	1.4157e-149	0
HNRNPC	7.49182e-154	-0.252329	0.988	0.941	2.74208e-149	0
RPS6KA3	1.27445e-153	-0.296758	0.719	0.704	4.6646e-149	0
ATP10D	2.40558e-153	-0.278877	0.613	0.64	8.80465e-149	0
PDLIM5	2.69093e-153	-0.44992	0.848	0.787	9.84906e-149	0
HMGA1	4.1654e-153	0.257378	0.983	0.902	1.52458e-148	0
ATF7	5.76098e-153	-0.267754	0.669	0.673	2.10857e-148	0
ACTB	8.60361e-153	0.291196	1	0.991	3.14901e-148	0
LRP1B	9.37761e-153	-0.394478	0.089	0.219	3.4323e-148	0
GLS	1.25984e-152	-0.507591	0.922	0.847	4.61114e-148	0
NEK1	3.28864e-152	-0.265303	0.535	0.591	1.20368e-147	0
EPN2	6.23444e-152	-0.304896	0.742	0.716	2.28187e-147	0
TSPAN5	7.45963e-152	-0.501096	0.914	0.814	2.7303e-147	0
CLMP	8.24811e-152	-0.546943	0.944	0.839	3.01889e-147	0
NECTIN3	3.89173e-151	-0.450524	0.936	0.836	1.42441e-146	0
AC004784.1	4.25617e-151	-0.314754	0.16	0.299	1.5578e-146	0
LAMC1	4.6907e-151	-0.36988	0.954	0.859	1.71684e-146	0
FOSL1	9.48639e-150	-0.499623	0.85	0.769	3.47211e-145	0
BDP1	1.53064e-149	-0.254266	0.709	0.703	5.60229e-145	0
FOSB	8.28833e-149	-0.264093	0.195	0.332	3.03361e-144	0
ENAH	9.68337e-149	-0.377433	0.963	0.887	3.54421e-144	0
TRAK1	1.1345e-148	-0.30168	0.521	0.572	4.15239e-144	0
MYO6	1.34267e-148	-0.310344	0.7	0.694	4.91431e-144	0
GNAI1	1.92945e-148	-0.358789	0.707	0.695	7.06197e-144	0
DENND2A	3.79629e-148	-0.342049	0.276	0.395	1.38948e-143	0
RAB10	2.34714e-147	-0.264741	0.941	0.853	8.59076e-143	0
RBMX	3.17909e-147	-0.286865	0.827	0.777	1.16358e-142	0
SMURF2	4.32055e-147	-1.05941	0.959	0.887	1.58136e-142	0
TOP2A	7.81198e-146	-0.499015	0.104	0.238	2.85926e-141	0
ASPM	9.48018e-145	-0.38959	0.082	0.211	3.46984e-140	0
CUEDC1	2.09304e-144	-0.264328	0.552	0.592	7.66072e-140	0
CDYL	3.48455e-144	-0.309354	0.764	0.721	1.27538e-139	0
PPFIA1	4.69731e-144	-0.252077	0.777	0.75	1.71926e-139	0
KDM4B	5.71587e-144	-0.274231	0.562	0.602	2.09207e-139	0
UCK2	7.86584e-144	-0.265582	0.576	0.614	2.87898e-139	0
MBOAT2	7.93206e-144	-0.301835	0.68	0.671	2.90321e-139	0
MAP2K1	1.18737e-143	-0.262848	0.721	0.711	4.34588e-139	0
THUMPD3-AS1	1.78263e-143	-0.288641	0.596	0.644	6.52461e-139	0
RPL22L1	3.93731e-142	0.28958	0.979	0.844	1.4411e-137	0
SUPT16H	4.29773e-142	-0.293495	0.808	0.753	1.57301e-137	0
HNRNPU	4.73189e-142	-0.385074	0.965	0.87	1.73192e-137	0
MAST4	6.15324e-142	-0.32782	0.565	0.597	2.25215e-137	0
[truncated: 13,114 more rows]
