# Supplementary material for: Single-cell transcriptomic analysis uncovers diverse and dynamic senescent cell populations
Source: Aging (Albany NY). 2023 Apr 19;15(8):2824–51. doi: 10.18632/aging.204666 (PMC10188353; doi:10.18632/aging.204666)
Supplement: Supplementary Table 7 [file aging-15-204666-s007.xlsx]

## Sheet: Sheet1
Supplementary Table 7. Splicing factors with different expression in cluster 5 versus all other cells of ETO time course.
	p_val	avg_log2FC	pct.1	pct.2	p_val_adj
SYF2	0	-0.739683	0.333	0.857	0
DNAJC8	0	-0.970566	0.479	0.933	0
SRSF4	0	0.899653	0.972	0.82	0
YBX1	0	-2.27876	0.664	0.978	0
SRSF11	0	0.688925	0.978	0.898	0
RBM8A	0	-1.20612	0.278	0.917	0
SNRPE	0	-1.42209	0.367	0.942	0
SF3B6	0	-1.46594	0.407	0.957	0
SNRNP27	0	-0.607671	0.243	0.811	0
PCBP1	0	-1.28555	0.306	0.916	0
SNRPG	0	-1.34565	0.394	0.935	0
LSM3	0	-1.18264	0.245	0.92	0
RBM5	0	0.784009	0.885	0.608	0
POLR2H	0	-0.438848	0.364	0.785	0
LSM6	0	-0.440236	0.208	0.717	0
HNRNPA0	0	-0.663841	0.151	0.799	0
LSM2	0	-0.567951	0.139	0.728	0
SNRPC	0	-0.740439	0.34	0.881	0
SRSF3	0	-0.96751	0.697	0.893	0
SF3B5	0	-1.43301	0.275	0.947	0
LSM5	0	-1.0126	0.354	0.9	0
BUD31	0	-1.19165	0.277	0.918	0
POLR2J	0	-1.29054	0.282	0.936	0
POLR2K	0	-1.17112	0.254	0.924	0
PUF60	0	-0.494325	0.266	0.775	0
HNRNPK	0	-1.22123	0.649	0.944	0
HNRNPF	0	-0.587852	0.486	0.843	0
POLR2L	0	-2.16639	0.716	0.989	0
CSTF3	0	0.663898	0.86	0.663	0
POLR2G	0	-0.524348	0.139	0.752	0
CWC15	0	-0.559783	0.33	0.821	0
HSPA8	0	-1.83681	0.522	0.961	0
ZCRB1	0	-0.797159	0.317	0.872	0
HNRNPA1	0	-1.25351	0.467	0.934	0
SNRPF	0	-1.10568	0.283	0.918	0
SRSF9	0	-1.31378	0.444	0.944	0
PABPN1	0	0.660275	0.894	0.794	0
SNRNP25	0	-0.602955	0.135	0.757	0
CD2BP2	0	-0.433979	0.23	0.734	0
FUS	0	0.646557	0.946	0.794	0
EIF4A3	0	-0.405788	0.184	0.675	0
ALYREF	0	-0.504936	0.096	0.705	0
SNRPD1	0	-1.05877	0.4	0.889	0
TXNL4A	0	-0.872644	0.666	0.934	0
POLR2E	0	-0.73998	0.371	0.885	0
LSM7	0	-1.32946	0.486	0.939	0
GTF2F1	0	-0.371264	0.242	0.707	0
LSM4	0	-1.11226	0.322	0.913	0
POLR2I	0	-1.07838	0.18	0.898	0
SNRPD2	0	-1.54257	0.377	0.965	0
SYMPK	0	0.499913	0.773	0.523	0
SNRPB	0	-1.11224	0.39	0.895	0
SNRPB2	0	-1.02704	0.298	0.902	0
SNRPD3	0	-0.711555	0.296	0.863	0
POLR2F	0	-1.0131	0.353	0.912	0
SNU13	0	-1.44709	0.61	0.969	0
FIP1L1	4.66058e-306	0.578974	0.853	0.699	1.70582e-301
WDR33	4.291e-302	0.510685	0.842	0.692	1.57055e-297
HNRNPH2	1.94246e-294	-0.367222	0.246	0.699	7.1096e-290
SF3B4	6.15125e-294	-0.319578	0.171	0.629	2.25142e-289
MAGOHB	6.75155e-293	-0.415982	0.278	0.716	2.47114e-288
GTF2F2	9.18992e-286	0.607433	0.9	0.822	3.3636e-281
WBP11	5.84059e-285	-0.363261	0.266	0.708	2.13771e-280
SF3B2	2.37212e-283	-0.504206	0.564	0.866	8.68219e-279
BCAS2	2.33459e-277	-0.36886	0.265	0.712	8.54482e-273
SRSF2	1.70319e-276	-0.64017	0.648	0.869	6.23385e-272
PHF5A	5.73238e-273	-0.277811	0.144	0.589	2.09811e-268
PRPF31	1.14543e-254	-0.319776	0.255	0.682	4.19237e-250
SF3A1	1.04503e-246	-0.2751	0.184	0.607	3.8249e-242
PQBP1	4.27996e-240	-0.265631	0.149	0.571	1.56651e-235
SF1	9.68744e-230	0.497884	0.91	0.823	3.5457e-225
LSM8	1.19022e-229	-0.392062	0.486	0.811	4.35634e-225
MTREX	1.81082e-225	0.45817	0.799	0.658	6.62778e-221
HNRNPA2B1	4.71719e-212	-0.576879	0.906	0.941	1.72654e-207
SRRM2	6.59351e-212	-0.459708	0.824	0.89	2.41329e-207
CPSF7	2.49746e-201	0.369819	0.675	0.476	9.14094e-197
PRPF6	5.51092e-200	-0.33833	0.487	0.795	2.01705e-195
PCBP2	1.42323e-190	-0.381886	0.929	0.938	5.20918e-186
RBM17	4.04411e-190	-0.383594	0.597	0.839	1.48019e-185
CWC27	2.96786e-188	0.416321	0.804	0.679	1.08627e-183
AQR	1.17213e-185	0.38858	0.724	0.564	4.2901e-181
POLR2C	2.99586e-185	-0.256646	0.263	0.639	1.09651e-180
HNRNPU	5.46139e-185	-0.583323	0.826	0.904	1.99892e-180
MAGOH	1.21002e-178	-0.326876	0.384	0.715	4.42879e-174
PPWD1	6.77808e-172	0.294133	0.568	0.346	2.48084e-167
DDX5	8.98814e-172	0.458661	0.984	0.914	3.28975e-167
SNRNP70	8.30074e-157	0.398699	0.852	0.778	3.03816e-152
CCAR1	2.34741e-150	0.370311	0.874	0.805	8.59175e-146
PRPF3	1.2372e-149	0.297248	0.599	0.409	4.52829e-145
HNRNPA3	1.91498e-141	-0.460826	0.853	0.925	7.00901e-137
RNPC3	5.14511e-141	0.293014	0.541	0.353	1.88316e-136
SNRPA1	1.96288e-140	-0.355135	0.511	0.761	7.18434e-136
NCBP2	3.60088e-135	-0.273784	0.573	0.822	1.31796e-130
HNRNPH1	5.28568e-106	0.284769	0.94	0.873	1.93461e-101
SRRM1	3.50687e-97	-0.286075	0.719	0.857	1.28355e-92
GCFC2	7.70632e-89	0.255955	0.486	0.349	2.82059e-84
HNRNPR	1.32342e-71	-0.401163	0.804	0.873	4.84384e-67
SRSF7	3.52802e-52	-0.290663	0.694	0.805	1.29129e-47
