# Supplementary material for: Single-cell transcriptomic analysis uncovers diverse and dynamic senescent cell populations
Source: Aging (Albany NY). 2023 Apr 19;15(8):2824–51. doi: 10.18632/aging.204666 (PMC10188353; doi:10.18632/aging.204666)
Supplement: Supplementary Table 8 [file aging-15-204666-s008.xlsx]

## Sheet: Sheet1
Supplementary Table 8. lncRNAs with different expression in cluster 5 versus all other cells of ETO time course.
gene	p_val	avg_log2FC	pct.1	pct.2	p_val_adj
MIR34AHG	0	1.08996	0.849	0.373	0
CCDC18-AS1	0	0.932216	0.83	0.416	0
MIR137HG	0	0.908739	0.704	0.271	0
SLC16A1-AS1	0	0.991446	0.87	0.534	0
WARS2-AS1	0	0.477992	0.603	0.281	0
LINC02802	0	-0.680856	0.515	0.854	0
LINC01138	0	0.386432	0.487	0.182	0
GAS5	0	-1.60558	0.79	0.969	0
MIR181A1HG	0	1.6779	0.941	0.446	0
LINC00862	0	0.383131	0.4	0.118	0
IPO9-AS1	0	0.556077	0.621	0.297	0
MIR29B2CHG	0	0.29828	0.371	0.088	0
LINC01376	0	0.582694	0.572	0.187	0
MAP4K3-DT	0	0.896613	0.912	0.778	0
LINC01829	0	0.426702	0.43	0.137	0
LINC00342	0	0.493887	0.589	0.177	0
MIR4435-2HG	0	1.09701	0.974	0.873	0
PAX8-AS1	0	0.733475	0.858	0.694	0
LINC01191	0	0.264735	0.354	0.075	0
LINC01473	0	1.01879	0.79	0.32	0
LMCD1-AS1	0	0.624719	0.525	0.171	0
THUMPD3-AS1	0	0.588262	0.822	0.613	0
C3orf35	0	0.361043	0.459	0.1	0
KIF9-AS1	0	0.913227	0.839	0.434	0
LINC02614	0	0.644868	0.672	0.273	0
KCNMB2-AS1	0	0.643635	0.499	0.146	0
TAPT1-AS1	0	0.381997	0.477	0.127	0
DANCR	0	-0.516706	0.381	0.797	0
UBA6-AS1	0	0.539267	0.575	0.275	0
SNHG8	0	-1.06293	0.57	0.933	0
LINC02615	0	0.931539	0.688	0.188	0
LINC02511	0	0.711024	0.378	0.092	0
OSMR-AS1	0	0.65172	0.692	0.303	0
CKMT2-AS1	0	0.507101	0.677	0.379	0
TMEM161B-AS1	0	0.699827	0.746	0.5	0
NR2F1-AS1	0	1.32502	0.948	0.721	0
LIX1-AS1	0	0.971638	0.671	0.167	0
LINC01340	0	0.575783	0.438	0.076	0
LINC02234	0	0.256187	0.269	0.048	0
LINC02062	0	0.540085	0.607	0.212	0
ADAMTS19-AS1	0	0.315504	0.288	0.05	0
C5orf66	0	0.901895	0.687	0.231	0
SPRY4-AS1	0	1.69367	0.924	0.491	0
GMDS-DT	0	1.36481	0.896	0.442	0
CASC15	0	1.13476	0.693	0.388	0
HCG17	0	0.502367	0.649	0.313	0
HCG18	0	0.524108	0.763	0.494	0
SNHG32	0	-0.868408	0.378	0.893	0
LINC00472	0	1.45163	0.879	0.399	0
TRAF3IP2-AS1	0	0.782079	0.751	0.432	0
HDAC2-AS2	0	0.463565	0.441	0.139	0
RNF217-AS1	0	1.66822	0.778	0.329	0
LINC00174	0	0.469115	0.591	0.224	0
TP53TG1	0	-0.655276	0.206	0.768	0
LINC01004	0	1.15389	0.911	0.41	0
SND1-IT1	0	0.334307	0.497	0.17	0
LINC00513	0	0.792777	0.86	0.598	0
LINC-PINT	0	0.676329	0.784	0.47	0
SNHG6	0	-1.35424	0.394	0.947	0
MSC-AS1	0	1.21908	0.883	0.637	0
OTUD6B-AS1	0	-0.477484	0.191	0.735	0
ZFPM2-AS1	0	1.65192	0.936	0.735	0
PVT1	0	2.04957	0.995	0.748	0
RFX3-AS1	0	0.36445	0.406	0.106	0
HMGA1P4	0	0.582645	0.655	0.221	0
SNHG7	0	-0.651219	0.427	0.845	0
NUTM2B-AS1	0	0.609584	0.834	0.635	0
NUTM2A-AS1	0	0.613565	0.892	0.778	0
KCNQ1OT1	0	1.10187	0.843	0.357	0
SPON1-AS1	0	0.335556	0.435	0.09	0
BDNF-AS	0	0.798481	0.792	0.362	0
LINC02742	0	0.586069	0.428	0.121	0
PPP1R14B-AS1	0	-0.507874	0.11	0.618	0
NEAT1	0	3.24366	1	0.881	0
MALAT1	0	2.72457	1	0.91	0
MIR100HG	0	2.21988	0.998	0.915	0
SPATA13	0	1.04717	0.833	0.479	0
LINC00571	0	0.465991	0.498	0.174	0
TPT1-AS1	0	0.61734	0.799	0.489	0
FAM155A-IT1	0	0.342045	0.452	0.072	0
MEG3	0	2.86741	0.995	0.82	0
MEG8	0	2.83866	0.976	0.707	0
SNHG14	0	1.77137	0.961	0.67	0
DPH6-DT	0	1.0573	0.705	0.229	0
GABPB1-AS1	0	0.678398	0.78	0.458	0
LINC02204	0	0.405749	0.342	0.066	0
NR2F2-AS1	0	1.00059	0.799	0.455	0
ERVK13-1	0	0.290505	0.448	0.14	0
FENDRR	0	0.873258	0.844	0.606	0
COX10-AS1	0	0.675449	0.679	0.323	0
SNHG29	0	-2.5028	0.863	0.992	0
HOXB-AS3	0	-0.760094	0.428	0.817	0
SNHG16	0	-1.18178	0.503	0.937	0
ZNF337-AS1	0	0.526134	0.635	0.241	0
NORAD	0	-0.647946	0.512	0.832	0
ZFAS1	0	-1.14855	0.812	0.966	0
NUP50-DT	0	0.516802	0.666	0.37	0
MIRLET7BHG	0	0.748158	0.766	0.308	0
LINC00685	0	0.566063	0.625	0.28	0
LINC00106	0	0.340786	0.47	0.111	0
MIR222HG	0	1.71005	0.94	0.548	0
LINC01278	0	0.930498	0.842	0.453	0
XIST	0	1.99265	0.978	0.667	0
FTX	0	2.47079	0.997	0.739	0
JPX	0	0.63141	0.933	0.866	0
LINC00630	0	0.352688	0.499	0.171	0
LINC00894	0	0.842118	0.732	0.213	0
EPB41L4A-AS1	7.49396e-302	-0.411623	0.17	0.629	2.74286e-297
MIR193BHG	4.32906e-286	0.44939	0.554	0.263	1.58448e-281
LINC01184	3.77023e-283	0.596914	0.771	0.602	1.37994e-278
PITPNA-AS1	2.73185e-276	-0.276662	0.093	0.536	9.99884e-272
MAMDC2-AS1	2.6322e-274	0.312521	0.397	0.13	9.63411e-270
TRHDE-AS1	4.06217e-274	0.730154	0.716	0.49	1.48679e-269
C2orf27A	3.96713e-272	0.632443	0.733	0.528	1.45201e-267
MIR22HG	6.53985e-261	0.460834	0.703	0.474	2.39365e-256
RAB30-DT	3.37685e-251	0.460482	0.743	0.546	1.23596e-246
LINC01535	1.4656e-246	0.270591	0.422	0.163	5.36425e-242
LINC01605	1.64549e-242	0.391274	0.396	0.143	6.02265e-238
SAMD12-AS1	2.5616e-242	0.337007	0.297	0.08	9.3757e-238
LINC01695	1.99601e-238	0.296078	0.219	0.045	7.30561e-234
LAMTOR5-AS1	2.9721e-237	0.277322	0.433	0.171	1.08782e-232
MIR181A2HG	7.56848e-237	0.537197	0.541	0.271	2.77014e-232
LIPE-AS1	2.61391e-235	0.506036	0.599	0.358	9.56718e-231
SNHG5	6.00685e-234	-0.513738	0.469	0.811	2.19857e-229
LINC00607	1.13374e-233	0.396758	0.341	0.108	4.14961e-229
LINC00882	4.05622e-233	0.44614	0.43	0.174	1.48462e-228
MIR99AHG	4.22981e-233	0.579792	0.465	0.2	1.54815e-228
CRIM1-DT	2.72274e-231	-0.289508	0.147	0.552	9.96549e-227
PCBP1-AS1	1.54518e-230	0.327646	0.507	0.238	5.65552e-226
MIR31HG	7.00863e-228	1.25088	0.768	0.554	2.56523e-223
DLEU2	1.03927e-226	0.793341	0.745	0.49	3.80383e-222
TARID	1.29248e-223	0.480796	0.437	0.182	4.73061e-219
LINC02246	1.34169e-220	0.309269	0.407	0.163	4.91071e-216
LINC01208	2.76998e-217	0.282092	0.206	0.043	1.01384e-212
ALOX12-AS1	6.28928e-217	0.452042	0.607	0.38	2.30194e-212
ENTPD1-AS1	1.10557e-216	0.404999	0.531	0.274	4.04649e-212
LINC01118	7.60118e-211	0.316086	0.413	0.169	2.78211e-206
ADAMTSL4-AS1	2.8272e-210	0.490214	0.665	0.386	1.03478e-205
ZEB1-AS1	1.44793e-209	0.45945	0.536	0.301	5.29957e-205
LINC01776	2.68611e-208	0.265006	0.292	0.087	9.83143e-204
ZNF790-AS1	9.14061e-206	0.268218	0.44	0.196	3.34556e-201
ARMCX5-GPRASP2	3.49179e-205	0.330425	0.489	0.245	1.27803e-200
FRMD6-AS1	1.35727e-204	0.291443	0.415	0.175	4.96773e-200
LINC00476	7.14378e-204	0.403888	0.56	0.327	2.61469e-199
LINC01301	1.06386e-201	0.255698	0.324	0.111	3.89382e-197
SNHG4	2.21833e-197	0.296878	0.435	0.193	8.11929e-193
MIATNB	3.69924e-196	0.340981	0.521	0.291	1.35396e-191
LINC00886	1.13592e-195	0.280894	0.346	0.127	4.1576e-191
GNG12-AS1	1.02001e-190	0.466145	0.594	0.369	3.73335e-186
LINC01111	1.3963e-190	0.330318	0.304	0.103	5.11058e-186
DIRC3	3.81036e-186	0.451643	0.459	0.22	1.39463e-181
SNHG9	2.50328e-182	-0.365031	0.285	0.646	9.16226e-178
LINC02853	1.216e-179	0.254237	0.199	0.047	4.45067e-175
SUCLG2-AS1	2.53338e-178	0.417887	0.453	0.232	9.27243e-174
LUCAT1	1.54245e-171	0.473095	0.344	0.139	5.64552e-167
ITGB1-DT	1.54987e-171	0.299259	0.387	0.171	5.67269e-167
PSMA3-AS1	5.64945e-162	0.330643	0.653	0.48	2.06775e-157
ZNF667-AS1	4.20157e-157	-0.356375	0.428	0.706	1.53782e-152
SNHG26	1.3493e-155	0.276997	0.404	0.192	4.93859e-151
TTN-AS1	1.96939e-149	0.251705	0.396	0.193	7.20815e-145
ELOA-AS1	8.66234e-149	0.276487	0.503	0.298	3.1705e-144
STXBP5-AS1	1.15564e-146	0.357172	0.414	0.211	4.22977e-142
SNHG3	2.44664e-142	0.421935	0.782	0.657	8.95495e-138
SCN1A-AS1	7.35855e-140	0.348541	0.533	0.318	2.6933e-135
BAALC-AS1	6.29329e-137	0.309246	0.412	0.219	2.30341e-132
RAP2C-AS1	4.84516e-136	0.333287	0.414	0.218	1.77338e-131
HIF1A-AS3	4.70576e-135	0.824879	0.457	0.251	1.72236e-130
MIR503HG	4.55734e-134	0.456922	0.527	0.322	1.66803e-129
STARD13-AS	4.63704e-131	0.265254	0.463	0.256	1.6972e-126
LINC01588	1.33917e-130	0.281066	0.466	0.271	4.9015e-126
ITGA9-AS1	2.07575e-123	0.258471	0.444	0.261	7.59745e-119
DUBR	1.65138e-113	0.303779	0.485	0.321	6.04422e-109
ADAMTS9-AS2	6.41154e-113	0.361502	0.264	0.108	2.34669e-108
TTC28-AS1	3.52343e-97	0.295815	0.541	0.416	1.28961e-92
ZNF433-AS1	1.71333e-93	0.321846	0.649	0.564	6.27096e-89
SLC8A1-AS1	6.89647e-93	0.319483	0.357	0.199	2.52418e-88
CYTOR	7.74005e-92	0.397077	0.973	0.942	2.83294e-87
LINC00662	6.26202e-88	0.317512	0.589	0.488	2.29196e-83
HMGA2-AS1	8.01246e-73	0.415378	0.472	0.329	2.93264e-68
LNCOG	1.349e-68	0.307355	0.584	0.475	4.93746e-64
C5orf17	8.27509e-64	0.46775	0.179	0.079	3.02876e-59
LINC00578	4.55001e-63	1.00496	0.306	0.179	1.66535e-58
LINC00511	8.47751e-55	0.339676	0.386	0.266	3.10285e-50
PURPL	8.27927e-40	0.400834	0.176	0.093	3.03029e-35
DANT2	2.55916e-39	0.409616	0.219	0.137	9.36677e-35
LINC00632	5.07009e-39	0.251367	0.398	0.321	1.8557e-34
C7orf69	3.63221e-34	0.285498	0.207	0.124	1.32943e-29
APCDD1L-DT	1.7047e-10	0.326436	0.592	0.643	6.23938e-06
